# Supplementary material for: A Comprehensive Analysis of the Metal–Nitrile Bonding in an Organo-Diiron System
Source: MDPI journal article supplement (doi:10.3390/molecules26237088), 2021-11-23

# checkCIF/PLATON report

Structure factors have been supplied for datablock(s) 11, 2, 3, 5

THIS REPORT IS FOR GUIDANCE ONLY. IF USED AS PART OF A REVIEW PROCEDURE FOR PUBLICATION, IT SHOULD NOT REPLACE THE EXPERTISE OF AN EXPERIENCED CRYSTALLOGRAPHIC REFEREE.

No syntax errors found.      CIF dictionary      Interpreting this report

## Datablock: 2

---

|                 |                                 |                                  |
|-----------------|---------------------------------|----------------------------------|
| Bond precision: | C-C = 0.0092 Å                  | Wavelength=0.71073               |
| Cell:           | a=10.9065(9)                    | b=14.8064(11)      c=15.9959(12) |
|                 | alpha=90                        | beta=101.382(3)      gamma=90    |
| Temperature:    | 100 K                           |                                  |
|                 | Calculated                      | Reported                         |
| Volume          | 2532.3(3)                       | 2532.3(3)                        |
| Space group     | P 21/n                          | P 21/n                           |
| Hall group      | -P 2yn                          | -P 2yn                           |
| Moiety formula  | C22 H27 Fe2 N2 O2, C F3 O3<br>S | ?                                |
| Sum formula     | C23 H27 F3 Fe2 N2 O5 S          | C23 H27 F3 Fe2 N2 O5 S           |
| Mr              | 612.23                          | 612.22                           |
| Dx,g cm-3       | 1.606                           | 1.606                            |
| Z               | 4                               | 4                                |
| Mu (mm-1)       | 1.287                           | 1.287                            |
| F000            | 1256.0                          | 1256.0                           |
| F000'           | 1259.84                         |                                  |
| h,k,lmax        | 12,17,19                        | 12,17,19                         |
| Nref            | 4461                            | 4453                             |
| Tmin,Tmax       | 0.814,0.868                     | 0.421,0.563                      |
| Tmin'           | 0.814                           |                                  |

Correction method= # Reported T Limits: Tmin=0.421 Tmax=0.563  
AbsCorr = EMPIRICAL

Data completeness= 0.998      Theta(max)= 25.027

R(reflections)= 0.0597( 3618)      wR2(reflections)= 0.1606( 4453)

S = 1.054      Npar= 328

---

The following ALERTS were generated. Each ALERT has the format

**test-name\_ALERT\_alert-type\_alert-level.**

Click on the hyperlinks for more details of the test.

---

### Alert level C

RINTA01\_ALERT\_3\_C The value of Rint is greater than 0.12

Rint given 0.149

|                   |                                                 |                                  |         |          |
|-------------------|-------------------------------------------------|----------------------------------|---------|----------|
| PLAT213_ALERT_2_C | Atom C103                                       | has ADP max/min Ratio .....      | 3.1     | oblate   |
| PLAT213_ALERT_2_C | Atom C201                                       | has ADP max/min Ratio .....      | 3.5     | prolat   |
| PLAT220_ALERT_2_C | NonSolvent                                      | Resd 1 C Ueq(max)/Ueq(min) Range | 4.0     | Ratio    |
| PLAT244_ALERT_4_C | Low 'Solvent' Ueq as Compared to Neighbors of   |                                  |         | S1 Check |
| PLAT341_ALERT_3_C | Low Bond Precision on C-C Bonds .....           |                                  | 0.00924 | Ang.     |
| PLAT906_ALERT_3_C | Large K Value in the Analysis of Variance ..... |                                  | 5.133   | Check    |
| PLAT911_ALERT_3_C | Missing FCF Refl Between Thmin & STh/L=         | 0.595                            |         | 8 Report |

---

### Alert level G

|                   |                                                  |       |              |
|-------------------|--------------------------------------------------|-------|--------------|
| PLAT083_ALERT_2_G | SHELXL Second Parameter in WGHT Unusually Large  | 10.84 | Why ?        |
| PLAT232_ALERT_2_G | Hirshfeld Test Diff (M-X) Fel --C1               | 7.3   | s.u.         |
| PLAT244_ALERT_4_G | Low 'Solvent' Ueq as Compared to Neighbors of    | C301  | Check        |
| PLAT343_ALERT_2_G | Unusual sp? Angle Range in Main Residue for      | C2    | Check        |
| PLAT343_ALERT_2_G | Unusual sp? Angle Range in Main Residue for      | C3    | Check        |
| PLAT870_ALERT_4_G | ALERTS Related to Twinning Effects Suppressed .. | !     | Info         |
| PLAT883_ALERT_1_G | No Info/Value for _atom_sites_solution_primary   |       | Please Do !  |
| PLAT909_ALERT_3_G | Percentage of I>2sig(I) Data at Theta(Max) Still | 73%   | Note         |
| PLAT931_ALERT_5_G | CIFcalcFCF Twin Law ( 1 0-1) Est.d BASF          | 0.30  | Check        |
| PLAT965_ALERT_2_G | The SHELXL WEIGHT Optimisation has not Converged |       | Please Check |

- 
- 0 **ALERT level A** = Most likely a serious problem - resolve or explain  
0 **ALERT level B** = A potentially serious problem, consider carefully  
8 **ALERT level C** = Check. Ensure it is not caused by an omission or oversight  
10 **ALERT level G** = General information/check it is not something unexpected
- 1 ALERT type 1 CIF construction/syntax error, inconsistent or missing data  
8 ALERT type 2 Indicator that the structure model may be wrong or deficient  
5 ALERT type 3 Indicator that the structure quality may be low  
3 ALERT type 4 Improvement, methodology, query or suggestion  
1 ALERT type 5 Informative message, check
- 

## Datablock: 3

---

Bond precision: C-C = 0.0048 A

Wavelength=0.71073

Cell: a=12.081(4) b=17.491(6) c=13.857(4)  
alpha=90 beta=107.13(2) gamma=90

Temperature: 100 K

|                | Calculated                      | Reported               |
|----------------|---------------------------------|------------------------|
| Volume         | 2798.2(16)                      | 2798.2(16)             |
| Space group    | P 21/n                          | P 21/n                 |
| Hall group     | -P 2yn                          | -P 2yn                 |
| Moiety formula | C25 H33 Fe2 N2 O2, C F3 O3<br>S | ?                      |
| Sum formula    | C26 H33 F3 Fe2 N2 O5 S          | C26 H33 F3 Fe2 N2 O5 S |
| Mr             | 654.30                          | 654.30                 |
| Dx,g cm-3      | 1.553                           | 1.553                  |
| Z              | 4                               | 4                      |
| Mu (mm-1)      | 1.170                           | 1.170                  |
| F000           | 1352.0                          | 1352.0                 |
| F000'          | 1355.87                         |                        |
| h,k,lmax       | 15,22,17                        | 15,22,17               |
| Nref           | 6113                            | 6110                   |
| Tmin,Tmax      | 0.773,0.890                     | 0.311,0.434            |
| Tmin'          | 0.773                           |                        |

Correction method= # Reported T Limits: Tmin=0.311 Tmax=0.434  
AbsCorr = EMPIRICAL

Data completeness= 1.000                      Theta(max)= 27.000

R(reflections)= 0.0485( 5340)              wR2(reflections)= 0.1056( 6110)

S = 1.127                                      Npar= 356

The following ALERTS were generated. Each ALERT has the format

**test-name\_ALERT\_alert-type\_alert-level.**

Click on the hyperlinks for more details of the test.

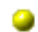

#### Alert level C

|                                                                    |                             |             |
|--------------------------------------------------------------------|-----------------------------|-------------|
| PLAT213_ALERT_2_C Atom C205                                        | has ADP max/min Ratio ..... | 3.5 prolat  |
| PLAT220_ALERT_2_C NonSolvent Resd 1 C                              | Ueq(max)/Ueq(min) Range     | 3.4 Ratio   |
| PLAT244_ALERT_4_C Low 'Solvent' Ueq as Compared to Neighbors of    |                             | S1 Check    |
| PLAT250_ALERT_2_C Large U3/U1 Ratio for Average U(i,j) Tensor .... |                             | 3.5 Note    |
| PLAT906_ALERT_3_C Large K Value in the Analysis of Variance .....  |                             | 4.045 Check |

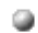

#### Alert level G

|                                                                    |  |             |
|--------------------------------------------------------------------|--|-------------|
| PLAT003_ALERT_2_G Number of Uiso or Uij Restrained non-H Atoms ... |  | 4 Report    |
| PLAT083_ALERT_2_G SHELXL Second Parameter in WGHT Unusually Large  |  | 7.34 Why ?  |
| PLAT186_ALERT_4_G The CIF-Embedded .res File Contains ISOR Records |  | 2 Report    |
| PLAT232_ALERT_2_G Hirshfeld Test Diff (M-X) Fe1 --C1 .             |  | 5.6 s.u.    |
| PLAT232_ALERT_2_G Hirshfeld Test Diff (M-X) Fe2 --N2 .             |  | 5.2 s.u.    |
| PLAT244_ALERT_4_G Low 'Solvent' Ueq as Compared to Neighbors of    |  | C301 Check  |
| PLAT343_ALERT_2_G Unusual sp? Angle Range in Main Residue for      |  | C2 Check    |
| PLAT343_ALERT_2_G Unusual sp? Angle Range in Main Residue for      |  | C3 Check    |
| PLAT860_ALERT_3_G Number of Least-Squares Restraints .....         |  | 24 Note     |
| PLAT883_ALERT_1_G No Info/Value for _atom_sites_solution_primary . |  | Please Do ! |
| PLAT912_ALERT_4_G Missing # of FCF Reflections Above STh/L= 0.600  |  | 3 Note      |
| PLAT978_ALERT_2_G Number C-C Bonds with Positive Residual Density. |  | 2 Info      |

---

0 **ALERT level A** = Most likely a serious problem - resolve or explain  
 0 **ALERT level B** = A potentially serious problem, consider carefully  
 5 **ALERT level C** = Check. Ensure it is not caused by an omission or oversight  
 12 **ALERT level G** = General information/check it is not something unexpected

1 ALERT type 1 CIF construction/syntax error, inconsistent or missing data  
 10 ALERT type 2 Indicator that the structure model may be wrong or deficient  
 2 ALERT type 3 Indicator that the structure quality may be low  
 4 ALERT type 4 Improvement, methodology, query or suggestion  
 0 ALERT type 5 Informative message, check

---

## Datablock: 5

---

Bond precision: C-C = 0.0066 Å Wavelength=0.71073

Cell: a=28.694(3) b=10.6013(9) c=23.210(2)  
 alpha=90 beta=116.562(3) gamma=90

Temperature: 100 K

|                        | Calculated                      | Reported               |
|------------------------|---------------------------------|------------------------|
| Volume                 | 6315.1(10)                      | 6315.0(10)             |
| Space group            | C 2/c                           | C 2/c                  |
| Hall group             | -C 2yc                          | -C 2yc                 |
| Moiety formula         | C29 H34 Fe2 N3 O2, C F3 O3<br>S | ?                      |
| Sum formula            | C30 H34 F3 Fe2 N3 O5 S          | C30 H34 F3 Fe2 N3 O5 S |
| Mr                     | 717.36                          | 717.36                 |
| Dx, g cm <sup>-3</sup> | 1.509                           | 1.509                  |
| Z                      | 8                               | 8                      |
| Mu (mm <sup>-1</sup> ) | 1.046                           | 1.046                  |
| F000                   | 2960.0                          | 2960.0                 |
| F000'                  | 2967.82                         |                        |
| h,k,lmax               | 35,13,28                        | 35,13,28               |
| Nref                   | 6210                            | 6200                   |
| Tmin,Tmax              | 0.828,0.882                     | 0.468,0.564            |
| Tmin'                  | 0.828                           |                        |

Correction method= # Reported T Limits: Tmin=0.468 Tmax=0.564  
 AbsCorr = EMPIRICAL

Data completeness= 0.998 Theta(max)= 26.000

R(reflections)= 0.0581( 5623) wR2(reflections)= 0.1603( 6200)

S = 1.084 Npar= 454

---

The following ALERTS were generated. Each ALERT has the format

**test-name\_ALERT\_alert-type\_alert-level.**

Click on the hyperlinks for more details of the test.

### ● Alert level C

DIFMX02\_ALERT\_1\_C The maximum difference density is > 0.1\*ZMAX\*0.75

The relevant atom site should be identified.

|                   |                                                  |         |        |
|-------------------|--------------------------------------------------|---------|--------|
| PLAT094_ALERT_2_C | Ratio of Maximum / Minimum Residual Density .... | 2.51    | Report |
| PLAT097_ALERT_2_C | Large Reported Max. (Positive) Residual Density  | 2.21    | eA-3   |
| PLAT220_ALERT_2_C | NonSolvent Resd 1 C Ueq(max)/Ueq(min) Range      | 3.4     | Ratio  |
| PLAT250_ALERT_2_C | Large U3/U1 Ratio for Average U(i,j) Tensor .... | 2.1     | Note   |
| PLAT341_ALERT_3_C | Low Bond Precision on C-C Bonds .....            | 0.00661 | Ang.   |
| PLAT906_ALERT_3_C | Large K Value in the Analysis of Variance .....  | 3.807   | Check  |
| PLAT911_ALERT_3_C | Missing FCF Refl Between Thmin & STh/L= 0.600    | 7       | Report |
| PLAT971_ALERT_2_C | Check Calcd Resid. Dens. 1.46A From C311         | 2.14    | eA-3   |

### ● Alert level G

|                   |                                                  |       |             |
|-------------------|--------------------------------------------------|-------|-------------|
| PLAT002_ALERT_2_G | Number of Distance or Angle Restraints on AtSite | 8     | Note        |
| PLAT003_ALERT_2_G | Number of Uiso or Uij Restrained non-H Atoms ... | 16    | Report      |
| PLAT083_ALERT_2_G | SHELXL Second Parameter in WGHT Unusually Large  | 45.75 | Why ?       |
| PLAT128_ALERT_4_G | Alternate Setting for Input Space Group C2/c     | I2/a  | Note        |
| PLAT172_ALERT_4_G | The CIF-Embedded .res File Contains DFIX Records | 3     | Report      |
| PLAT175_ALERT_4_G | The CIF-Embedded .res File Contains SAME Records | 4     | Report      |
| PLAT178_ALERT_4_G | The CIF-Embedded .res File Contains SIMU Records | 2     | Report      |
| PLAT186_ALERT_4_G | The CIF-Embedded .res File Contains ISOR Records | 2     | Report      |
| PLAT232_ALERT_2_G | Hirshfeld Test Diff (M-X) Fe1 --C1 .             | 5.8   | s.u.        |
| PLAT300_ALERT_4_G | Atom Site Occupancy of S1 Constrained at         | 0.5   | Check       |
| PLAT300_ALERT_4_G | Atom Site Occupancy of F11 Constrained at        | 0.5   | Check       |
| PLAT300_ALERT_4_G | Atom Site Occupancy of F12 Constrained at        | 0.5   | Check       |
| PLAT300_ALERT_4_G | Atom Site Occupancy of F13 Constrained at        | 0.5   | Check       |
| PLAT300_ALERT_4_G | Atom Site Occupancy of O11 Constrained at        | 0.5   | Check       |
| PLAT300_ALERT_4_G | Atom Site Occupancy of O12 Constrained at        | 0.5   | Check       |
| PLAT300_ALERT_4_G | Atom Site Occupancy of O13 Constrained at        | 0.5   | Check       |
| PLAT300_ALERT_4_G | Atom Site Occupancy of C301 Constrained at       | 0.5   | Check       |
| PLAT300_ALERT_4_G | Atom Site Occupancy of S2 Constrained at         | 0.5   | Check       |
| PLAT300_ALERT_4_G | Atom Site Occupancy of F21 Constrained at        | 0.5   | Check       |
| PLAT300_ALERT_4_G | Atom Site Occupancy of F22 Constrained at        | 0.5   | Check       |
| PLAT300_ALERT_4_G | Atom Site Occupancy of F23 Constrained at        | 0.5   | Check       |
| PLAT300_ALERT_4_G | Atom Site Occupancy of O21 Constrained at        | 0.5   | Check       |
| PLAT300_ALERT_4_G | Atom Site Occupancy of O22 Constrained at        | 0.5   | Check       |
| PLAT300_ALERT_4_G | Atom Site Occupancy of O23 Constrained at        | 0.5   | Check       |
| PLAT300_ALERT_4_G | Atom Site Occupancy of C311 Constrained at       | 0.5   | Check       |
| PLAT302_ALERT_4_G | Anion/Solvent/Minor-Residue Disorder (Resd 2 )   | 100%  | Note        |
| PLAT302_ALERT_4_G | Anion/Solvent/Minor-Residue Disorder (Resd 3 )   | 100%  | Note        |
| PLAT343_ALERT_2_G | Unusual sp? Angle Range in Main Residue for      | C2    | Check       |
| PLAT343_ALERT_2_G | Unusual sp? Angle Range in Main Residue for      | C3    | Check       |
| PLAT432_ALERT_2_G | Short Inter X...Y Contact C103 ..C103            | 3.17  | Ang.        |
|                   | 1-x,2-y,2-z =                                    | 5_677 | Check       |
| PLAT789_ALERT_4_G | Atoms with Negative _atom_site_disorder_group #  | 16    | Check       |
| PLAT860_ALERT_3_G | Number of Least-Squares Restraints .....         | 175   | Note        |
| PLAT883_ALERT_1_G | No Info/Value for _atom_sites_solution_primary . |       | Please Do ! |
| PLAT910_ALERT_3_G | Missing # of FCF Reflection(s) Below Theta(Min). | 2     | Note        |
| PLAT912_ALERT_4_G | Missing # of FCF Reflections Above STh/L= 0.600  | 1     | Note        |
| PLAT933_ALERT_2_G | Number of OMIT Records in Embedded .res File ... | 7     | Note        |
| PLAT978_ALERT_2_G | Number C-C Bonds with Positive Residual Density. | 4     | Info        |

0 **ALERT level A** = Most likely a serious problem - resolve or explain

0 **ALERT level B** = A potentially serious problem, consider carefully

9 **ALERT level C** = Check. Ensure it is not caused by an omission or oversight  
 37 **ALERT level G** = General information/check it is not something unexpected

2 ALERT type 1 CIF construction/syntax error, inconsistent or missing data  
 14 ALERT type 2 Indicator that the structure model may be wrong or deficient  
 5 ALERT type 3 Indicator that the structure quality may be low  
 25 ALERT type 4 Improvement, methodology, query or suggestion  
 0 ALERT type 5 Informative message, check

---

## Datablock: 11

---

Bond precision: C-C = 0.0062 A Wavelength=0.71073

Cell: a=15.1677(7) b=13.5839(6) c=22.1751(10)  
 alpha=90 beta=90 gamma=90

Temperature: 100 K

|                | Calculated                      | Reported               |
|----------------|---------------------------------|------------------------|
| Volume         | 4568.9(4)                       | 4568.9(4)              |
| Space group    | P b c a                         | P b c a                |
| Hall group     | -P 2ac 2ab                      | -P 2ac 2ab             |
| Moiety formula | C19 H21 Fe2 N2 O2, C F3 O3<br>S | ?                      |
| Sum formula    | C20 H21 F3 Fe2 N2 O5 S          | C20 H21 F3 Fe2 N2 O5 S |
| Mr             | 570.15                          | 570.15                 |
| Dx,g cm-3      | 1.658                           | 1.658                  |
| Z              | 8                               | 8                      |
| Mu (mm-1)      | 1.420                           | 1.420                  |
| F000           | 2320.0                          | 2320.0                 |
| F000'          | 2327.63                         |                        |
| h,k,lmax       | 18,16,27                        | 18,16,27               |
| Nref           | 4486                            | 4467                   |
| Tmin,Tmax      | 0.774,0.985                     | 0.435,0.563            |
| Tmin'          | 0.774                           |                        |

Correction method= # Reported T Limits: Tmin=0.435 Tmax=0.563  
 AbsCorr = EMPIRICAL

Data completeness= 0.996 Theta(max)= 25.999

R(reflections)= 0.0532( 4138) wR2(reflections)= 0.1085( 4467)

S = 1.252 Npar= 300

---

The following ALERTS were generated. Each ALERT has the format  
**test-name\_ALERT\_alert-type\_alert-level**.  
 Click on the hyperlinks for more details of the test.

---

### ● Alert level C

|                   |                                               |           |                         |         |        |
|-------------------|-----------------------------------------------|-----------|-------------------------|---------|--------|
| PLAT220_ALERT_2_C | NonSolvent                                    | Resd 1 C  | Ueq(max)/Ueq(min) Range | 3.9     | Ratio  |
| PLAT341_ALERT_3_C | Low Bond Precision on                         | C-C Bonds | .....                   | 0.00615 | Ang.   |
| PLAT906_ALERT_3_C | Large K Value in the Analysis of Variance     | .....     |                         | 6.286   | Check  |
| PLAT911_ALERT_3_C | Missing FCF Refl Between Thmin & STh/L=       | 0.600     |                         | 12      | Report |
| PLAT934_ALERT_3_C | Number of (Iobs-Icalc)/Sigma(W) > 10 Outliers | ..        |                         | 1       | Check  |
| PLAT975_ALERT_2_C | Check Calcd Resid. Dens.                      | 1.01A     | From O12                | 0.53    | eA-3   |
| PLAT975_ALERT_2_C | Check Calcd Resid. Dens.                      | 0.92A     | From O11                | 0.42    | eA-3   |

---

### ● Alert level G

|                   |                                                  |                                 |  |       |              |
|-------------------|--------------------------------------------------|---------------------------------|--|-------|--------------|
| PLAT083_ALERT_2_G | SHELXL Second Parameter in WGHT                  | Unusually Large                 |  | 15.24 | Why ?        |
| PLAT343_ALERT_2_G | Unusual sp?                                      | Angle Range in Main Residue for |  | C2    | Check        |
| PLAT343_ALERT_2_G | Unusual sp?                                      | Angle Range in Main Residue for |  | C3    | Check        |
| PLAT883_ALERT_1_G | No Info/Value for _atom_sites_solution_primary   | .                               |  |       | Please Do !  |
| PLAT912_ALERT_4_G | Missing # of FCF Reflections Above STh/L=        | 0.600                           |  | 8     | Note         |
| PLAT965_ALERT_2_G | The SHELXL WEIGHT Optimisation has not Converged |                                 |  |       | Please Check |
| PLAT978_ALERT_2_G | Number C-C Bonds with Positive Residual Density. |                                 |  | 0     | Info         |

---

0 **ALERT level A** = Most likely a serious problem - resolve or explain  
0 **ALERT level B** = A potentially serious problem, consider carefully  
7 **ALERT level C** = Check. Ensure it is not caused by an omission or oversight  
7 **ALERT level G** = General information/check it is not something unexpected

1 ALERT type 1 CIF construction/syntax error, inconsistent or missing data  
8 ALERT type 2 Indicator that the structure model may be wrong or deficient  
4 ALERT type 3 Indicator that the structure quality may be low  
1 ALERT type 4 Improvement, methodology, query or suggestion  
0 ALERT type 5 Informative message, check

---

---

It is advisable to attempt to resolve as many as possible of the alerts in all categories. Often the minor alerts point to easily fixed oversights, errors and omissions in your CIF or refinement strategy, so attention to these fine details can be worthwhile. In order to resolve some of the more serious problems it may be necessary to carry out additional measurements or structure refinements. However, the purpose of your study may justify the reported deviations and the more serious of these should normally be commented upon in the discussion or experimental section of a paper or in the "special\_details" fields of the CIF. checkCIF was carefully designed to identify outliers and unusual parameters, but every test has its limitations and alerts that are not important in a particular case may appear. Conversely, the absence of alerts does not guarantee there are no aspects of the results needing attention. It is up to the individual to critically assess their own results and, if necessary, seek expert advice.

### **Publication of your CIF in IUCr journals**

A basic structural check has been run on your CIF. These basic checks will be run on all CIFs submitted for publication in IUCr journals (*Acta Crystallographica*, *Journal of Applied Crystallography*, *Journal of Synchrotron Radiation*); however, if you intend to submit to *Acta Crystallographica Section C* or *E* or *IUCrData*, you should make sure that full publication checks are run on the final version of your CIF prior to submission.

### **Publication of your CIF in other journals**

Please refer to the *Notes for Authors* of the relevant journal for any special instructions relating to CIF submission.



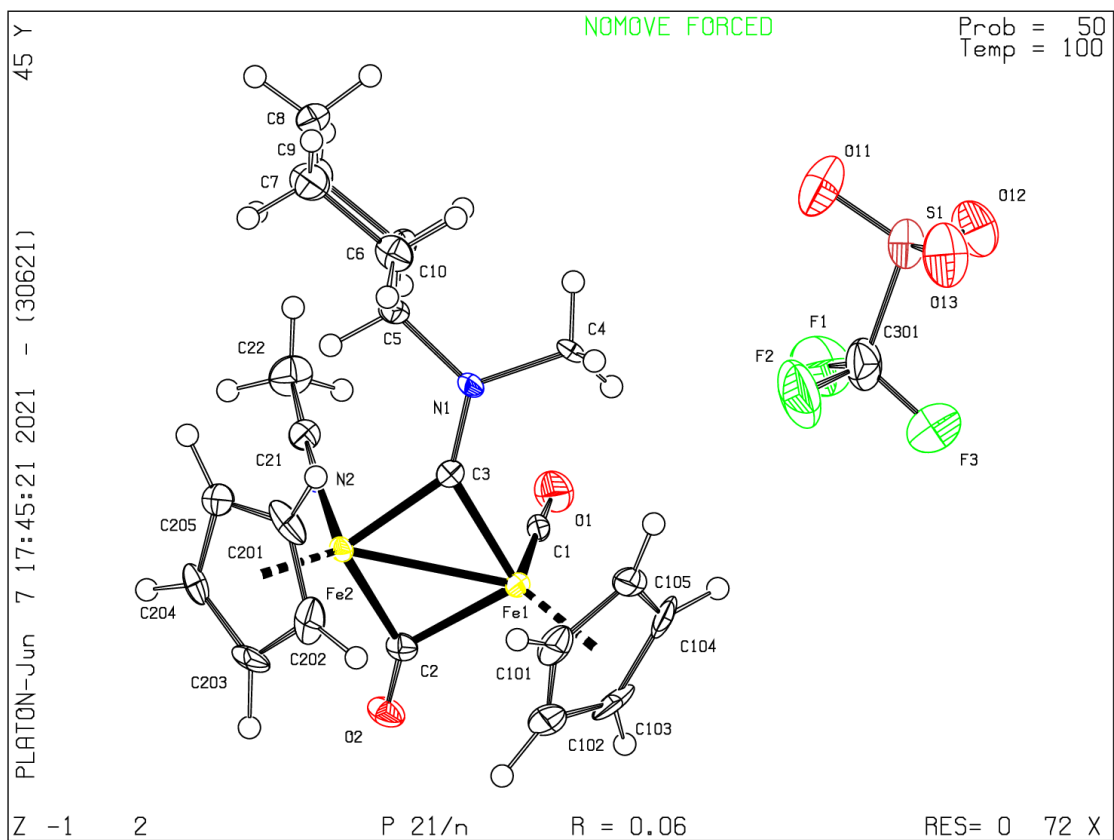

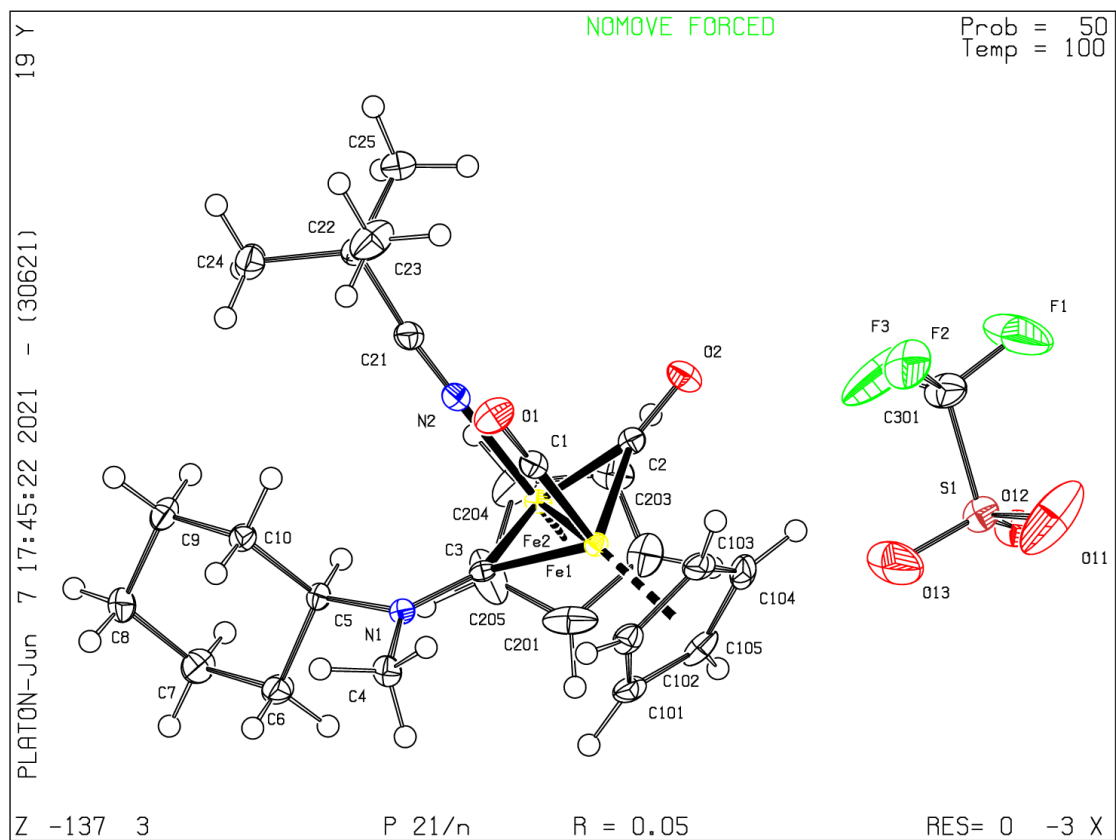

```

Prob = 50
Temp = 100

```

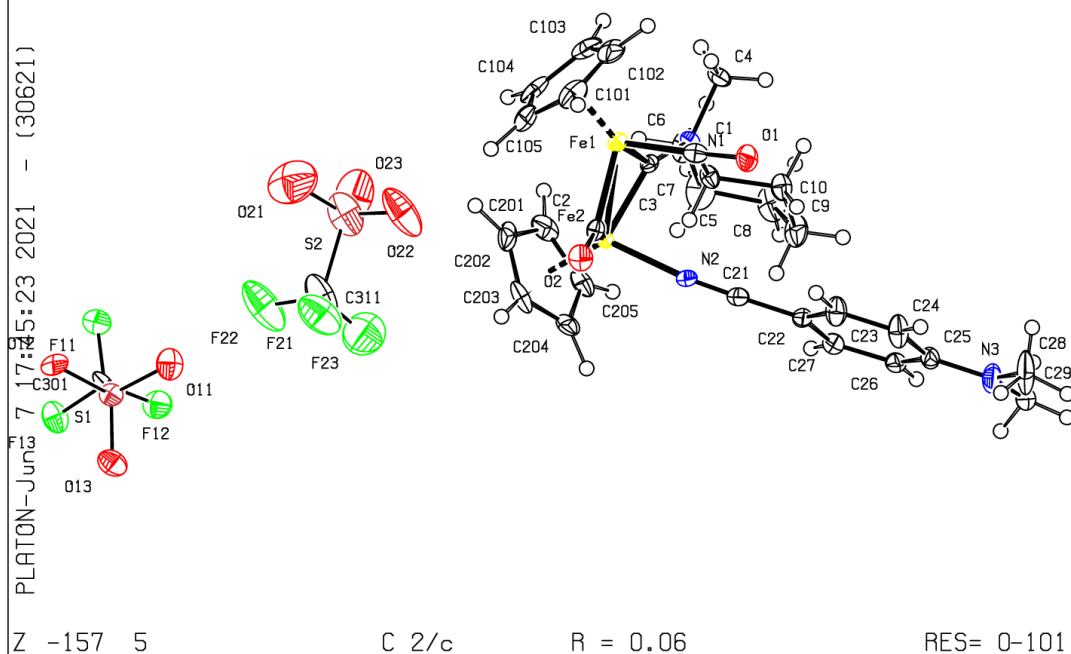

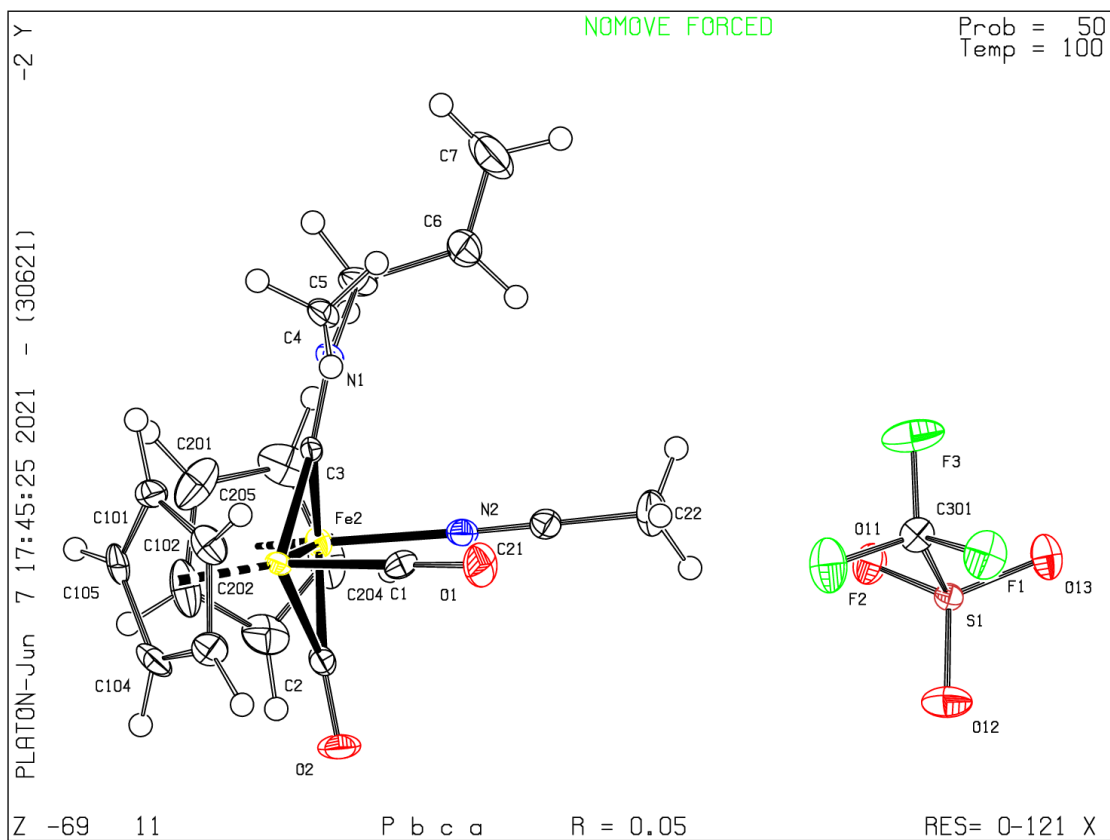

Supplement: s1 [file s1]
