# Supplementary material for: A Comprehensive Analysis of the Metal–Nitrile Bonding in an Organo-Diiron System
Source: MDPI journal article supplement (doi:10.3390/molecules26237088), 2021-11-23
Supplement: s1 [file s1]

# A Comprehensive Analysis of the Metal-Nitrile Bonding in an Organo-Diiron System

Giulio Bresciani, Lorenzo Biancalana, Guido Pampaloni, Stefano Zacchini, Gianluca Ciancaleoni,  
Fabio Marchetti

## Supporting Information

| <b><u>Table of contents</u></b>                                               | <i>Pages</i> |
|-------------------------------------------------------------------------------|--------------|
| <b>Figures S1-S25:</b> NMR spectra                                            | S2-S13       |
| <b>Figures S26-S47:</b> IR spectra                                            | S14-S24      |
| <b>Figure S48:</b> Alternative isodensity surface plots for $[\mathbf{M1}]^+$ | S25          |
| <b>Figure S49:</b> View of DFT structures of experimental complexes           | S26          |
| <b>Figure S50:</b> View of DFT structures of model complexes                  | S27          |
| <b>DFT optimized geometries</b>                                               | S28-S38      |

**Figure S1.**  $^1\text{H}$  NMR spectrum (401 MHz, acetone- $d_6$ ) of  $[2]\text{CF}_3\text{SO}_3$ .

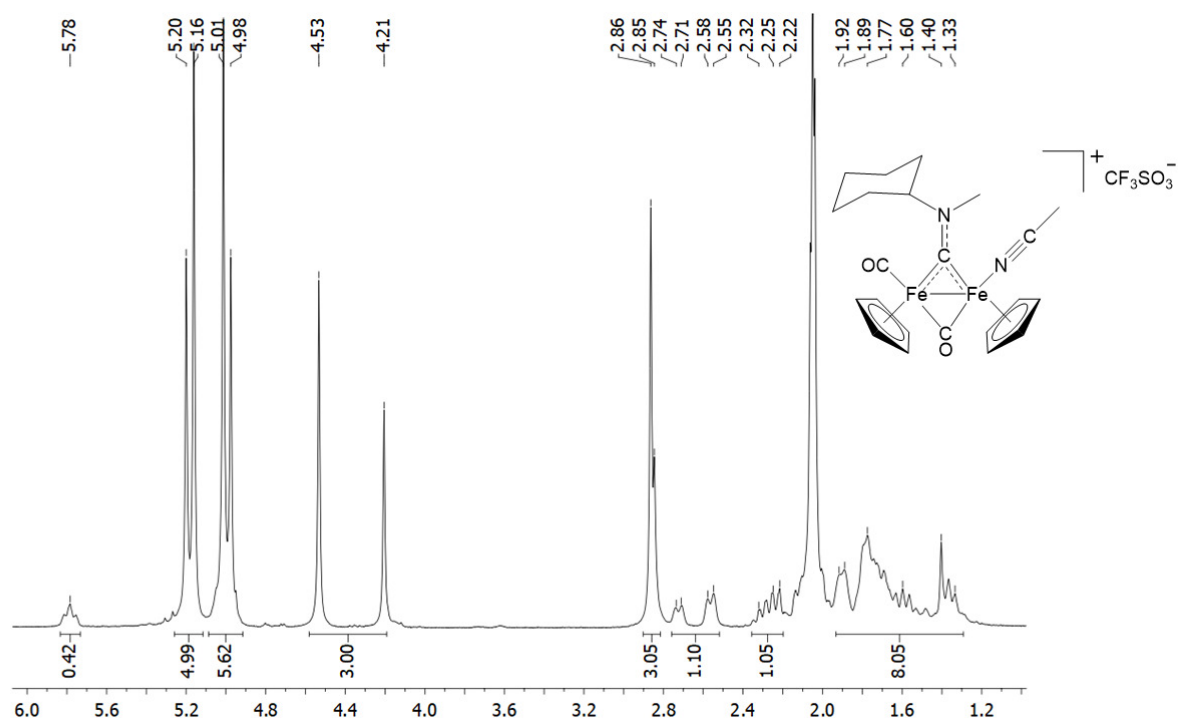

**Figure S2.**  $^{13}\text{C}\{^1\text{H}\}$  NMR spectrum (101 MHz, acetone- $d_6$ ) of  $[2]\text{CF}_3\text{SO}_3$ .

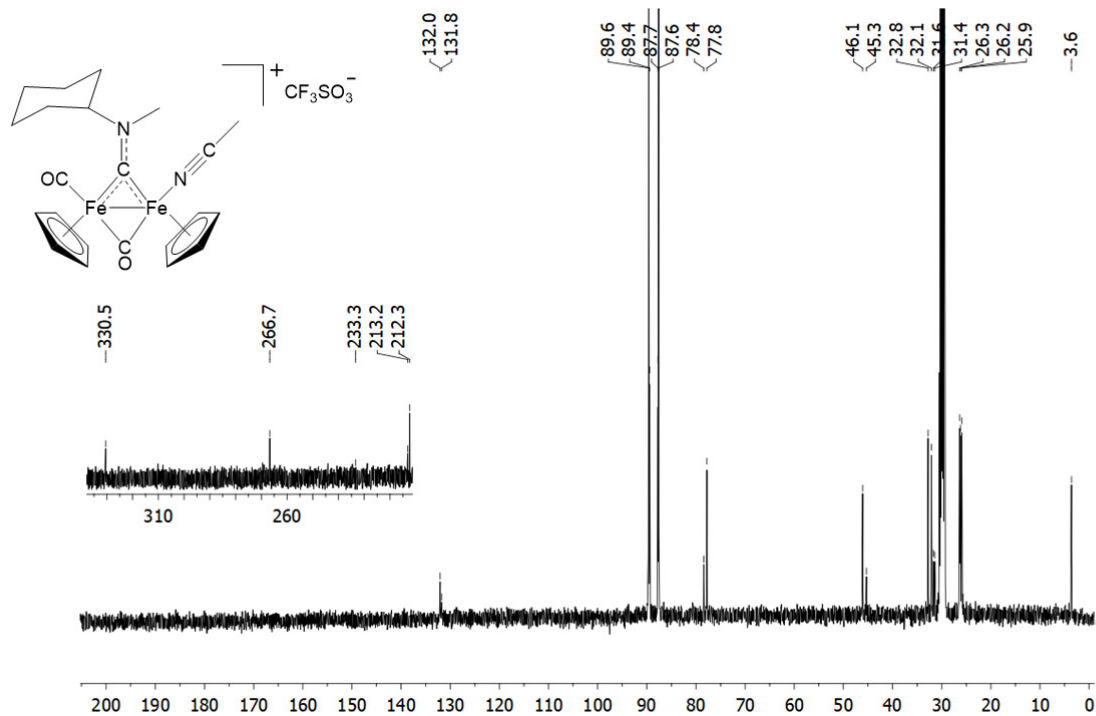

**Figure S3.**  $^1\text{H}$  NMR spectrum (401 MHz, acetone- $d_6$ ) of  $[\mathbf{3}]\text{CF}_3\text{SO}_3$ .

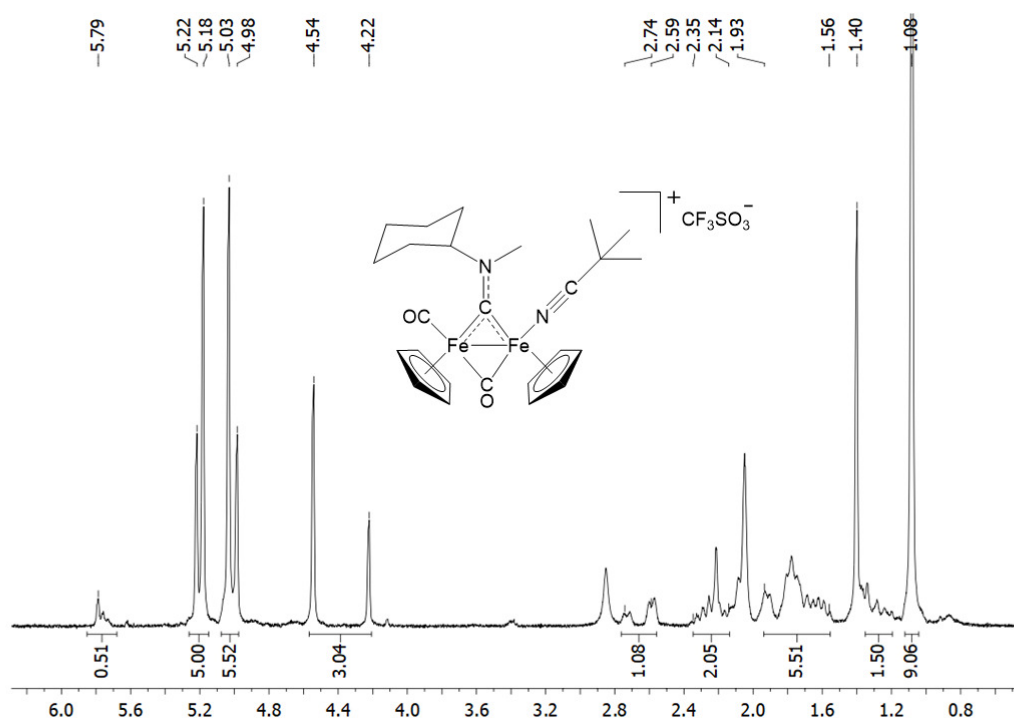

**Figure S4.**  $^{13}\text{C}\{^1\text{H}\}$  NMR spectrum (101 MHz, acetone- $d_6$ ) of  $[\mathbf{3}]\text{CF}_3\text{SO}_3$ .

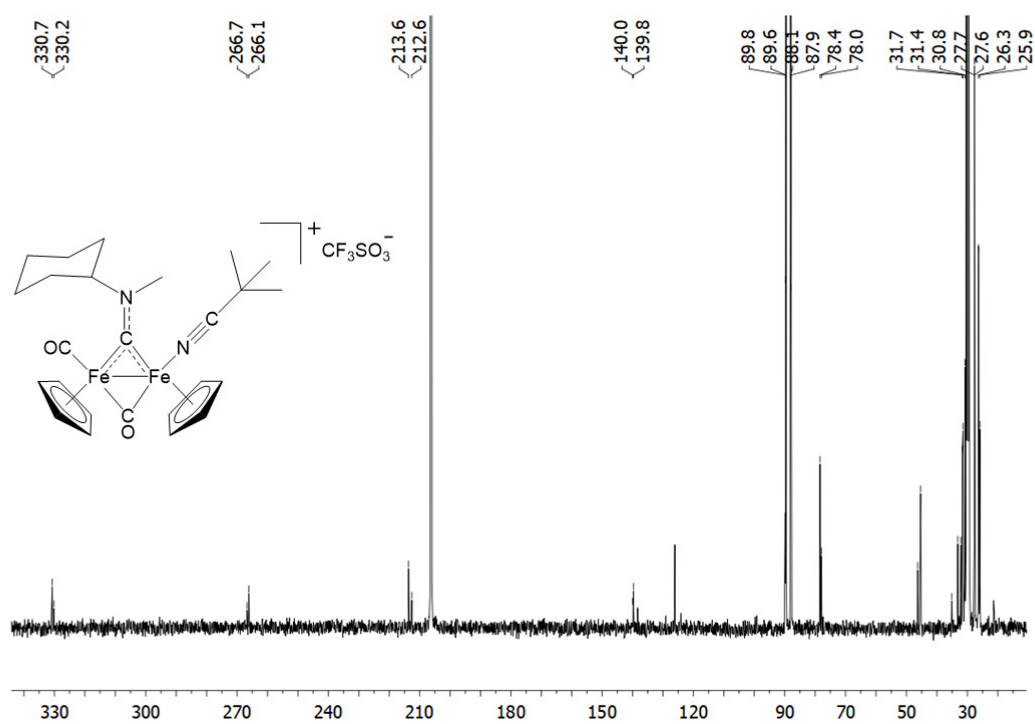

**Figure S5.**  $^1\text{H}$  NMR spectrum (401 MHz, acetone- $d_6$ ) of **[4]** $\text{CF}_3\text{SO}_3$ .

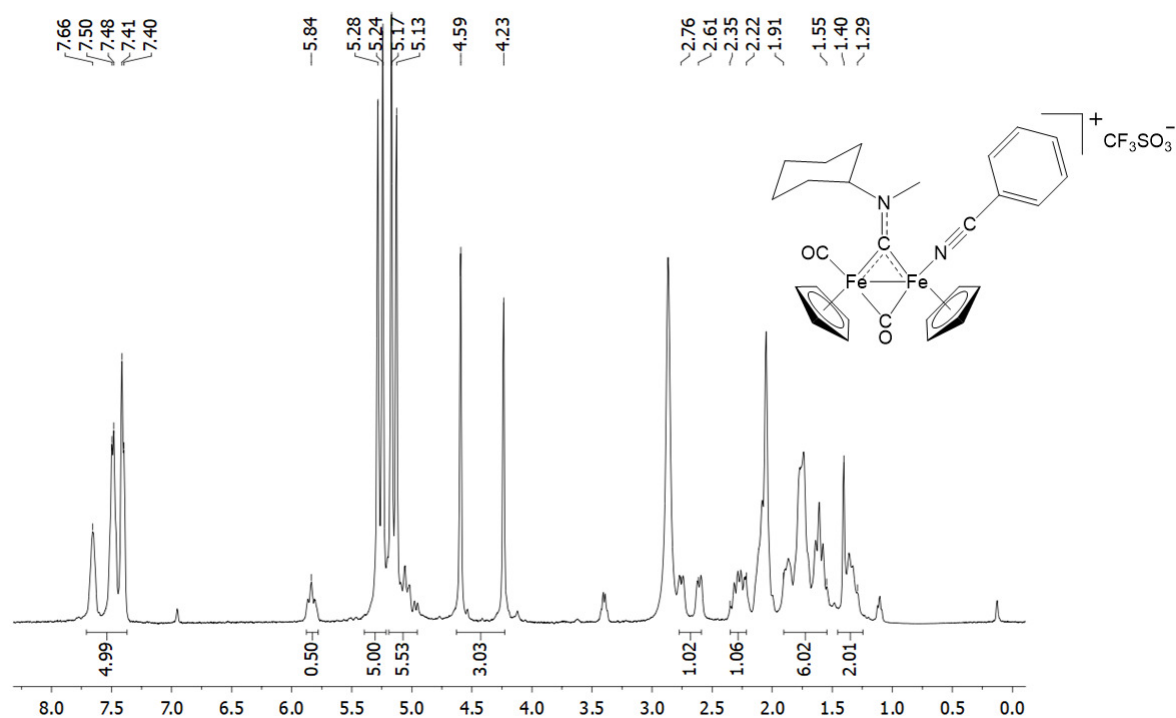

**Figure S6.**  $^{13}\text{C}\{^1\text{H}\}$  NMR spectrum (101 MHz, acetone- $d_6$ ) of **[4]** $\text{CF}_3\text{SO}_3$ .

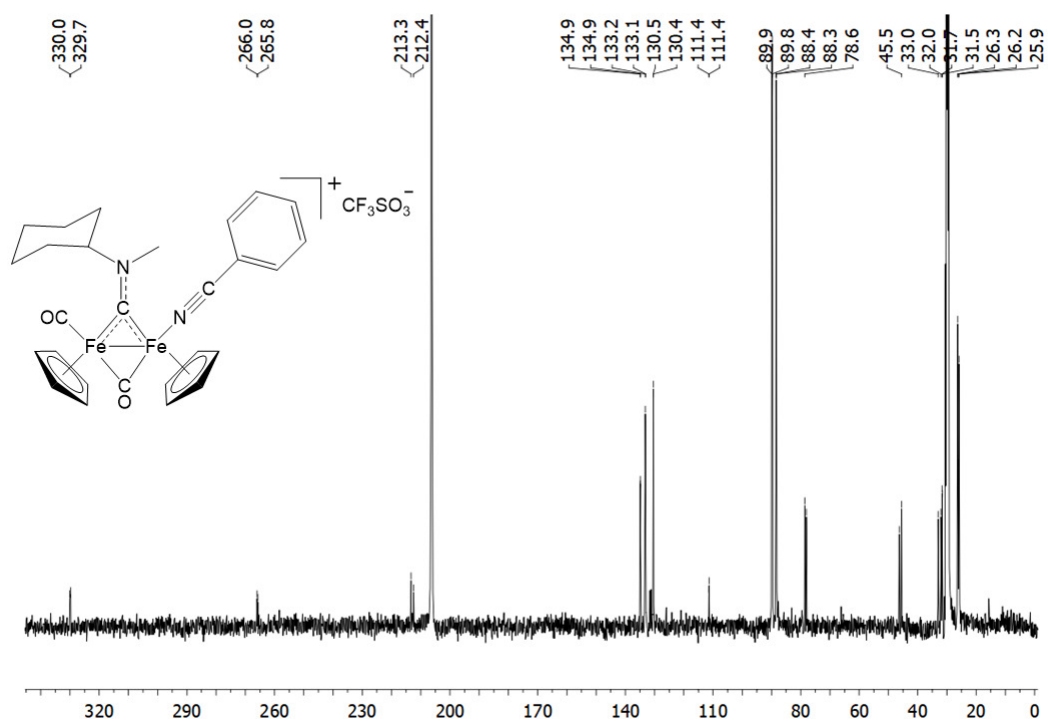

**Figure S7.**  $^1\text{H}$  NMR spectrum (401 MHz, acetone- $d_6$ ) of **[5]** $\text{CF}_3\text{SO}_3$ .

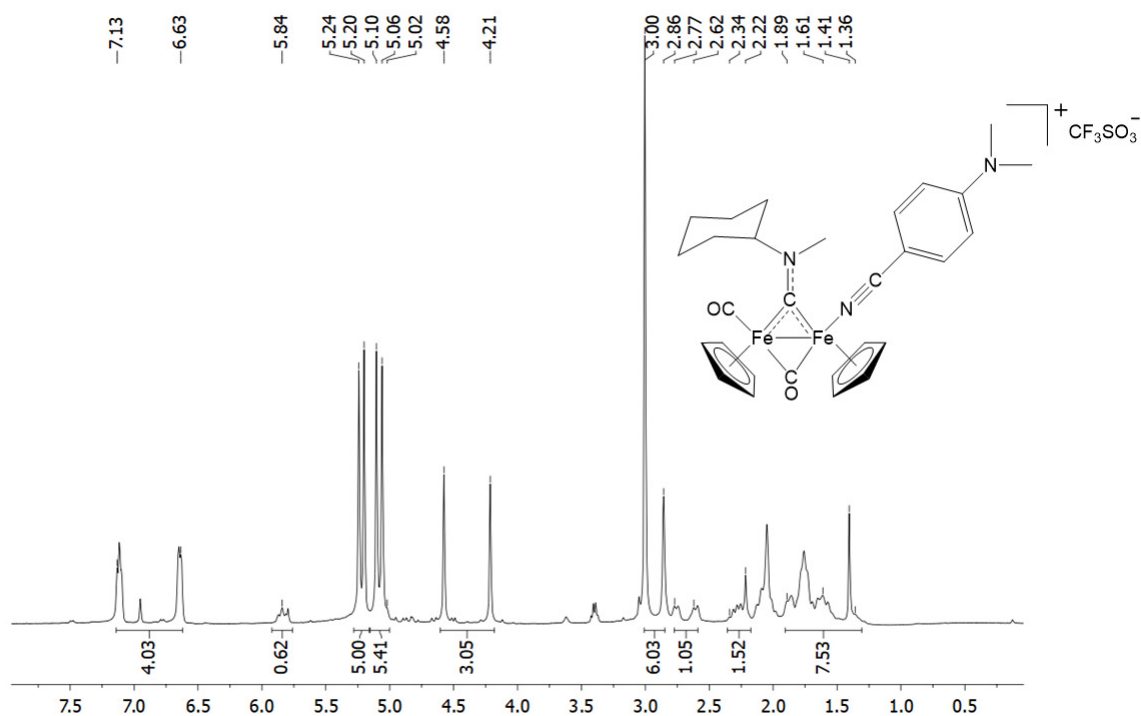

**Figure S8.**  $^{13}\text{C}\{^1\text{H}\}$  NMR spectrum (101 MHz, acetone- $d_6$ ) of **[5]** $\text{CF}_3\text{SO}_3$ .

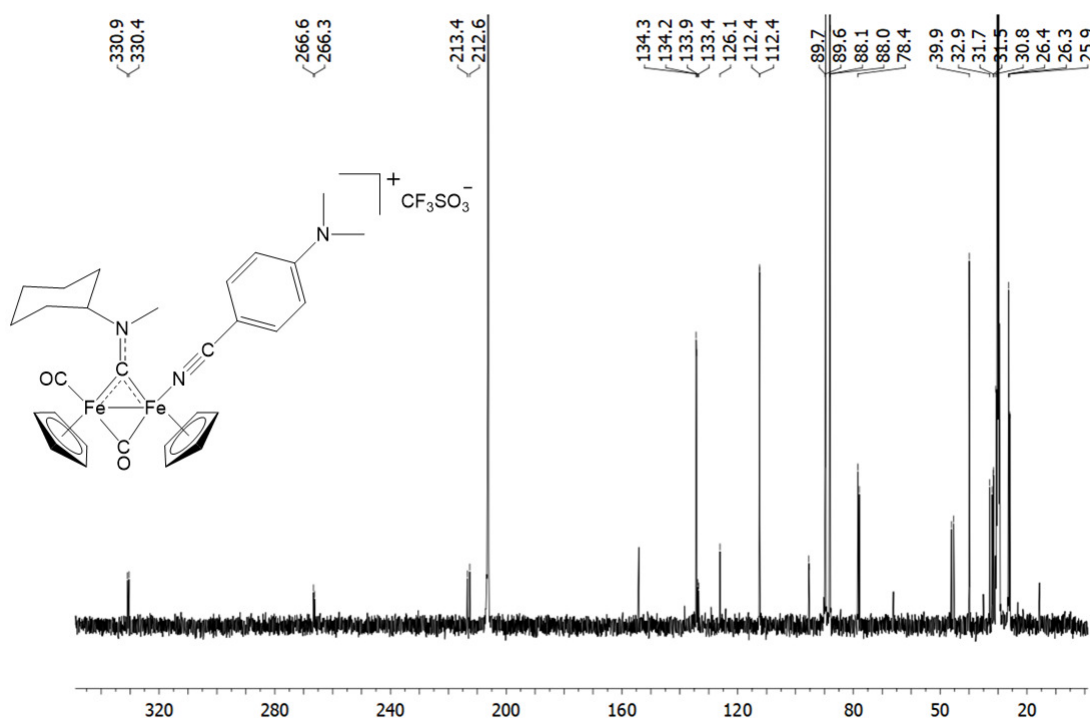

**Figure S9.**  $^1\text{H}$  NMR spectrum (401 MHz, acetone- $d_6$ ) of  $[\mathbf{6}]\text{CF}_3\text{SO}_3$ .

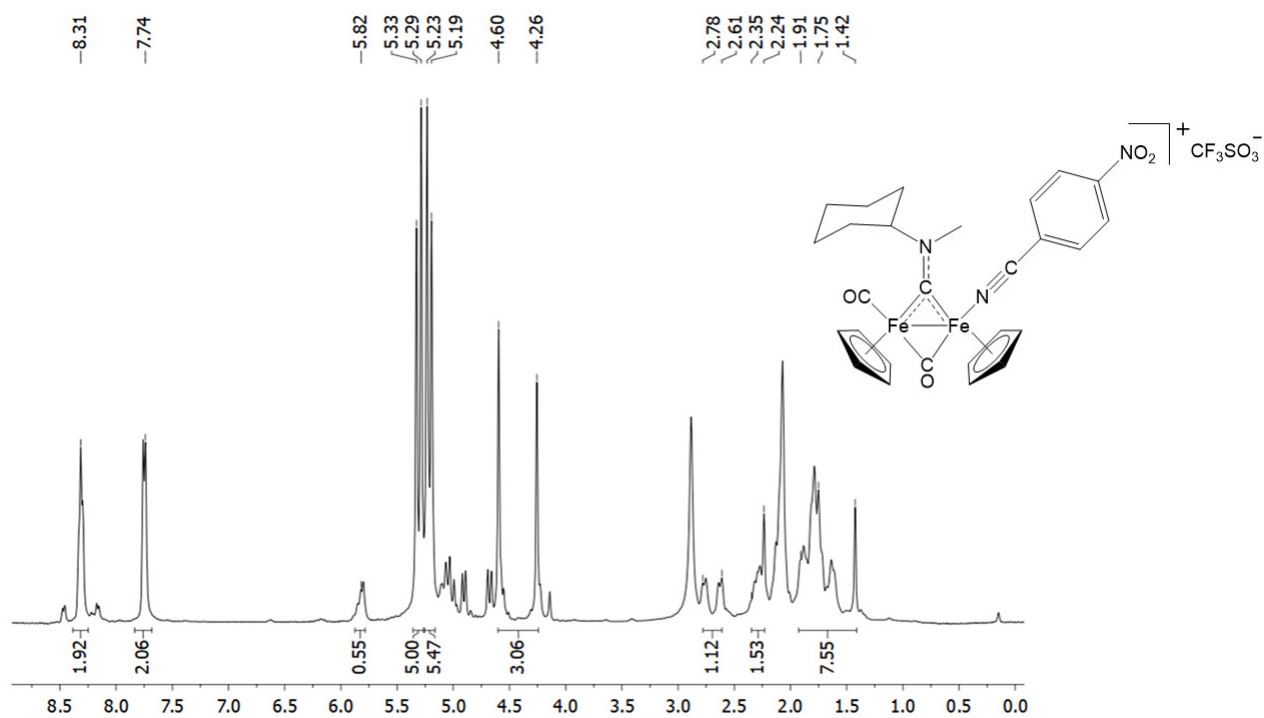

**Figure S10.**  $^{13}\text{C}\{^1\text{H}\}$  NMR spectrum (101 MHz, acetone- $d_6$ ) of  $[\mathbf{6}]\text{CF}_3\text{SO}_3$ .

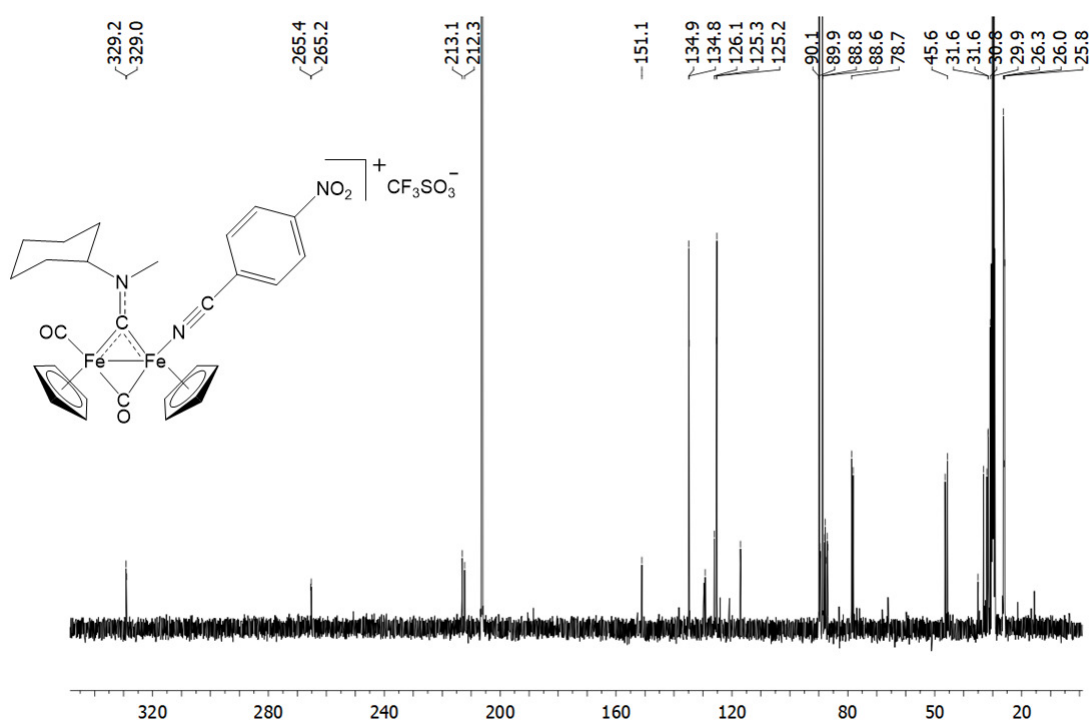

**Figure S11.**  $^1\text{H}$  NMR spectrum (401 MHz, acetone- $d_6$ ) of  $[\mathbf{7}]\text{CF}_3\text{SO}_3$ .

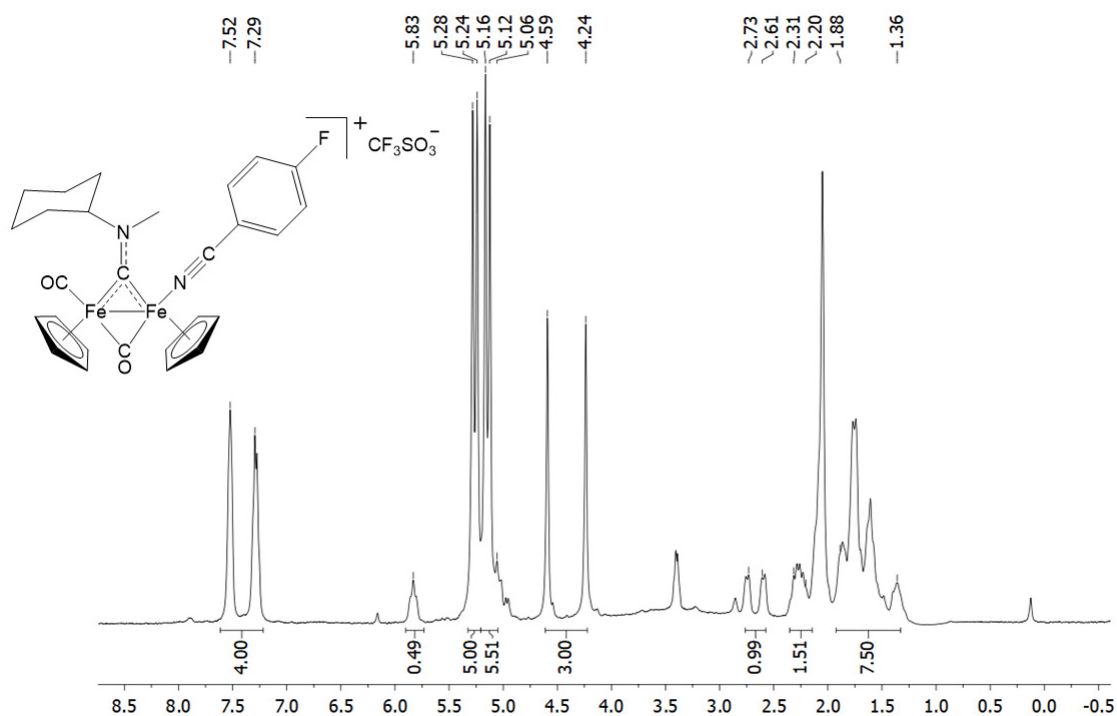

**Figure S12.**  $^{13}\text{C}\{^1\text{H}\}$  NMR spectrum (101 MHz, acetone- $d_6$ ) of  $[\mathbf{7}]\text{CF}_3\text{SO}_3$ .

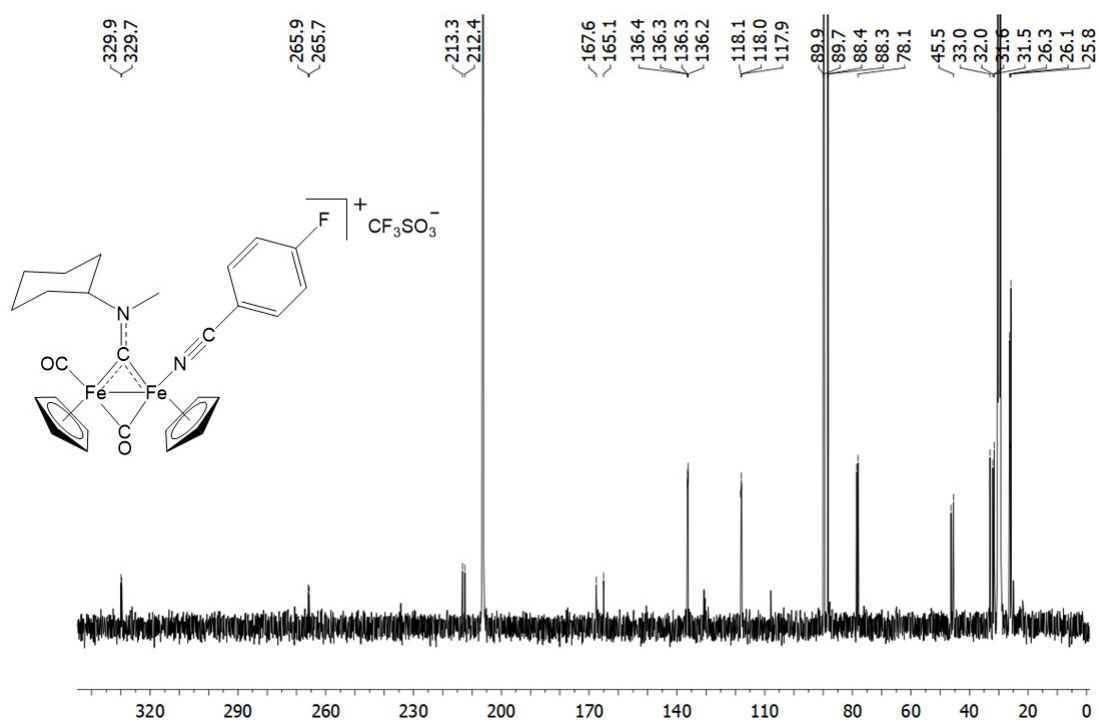

**Figure S13.**  $^{19}\text{F}$  NMR spectrum (101 MHz, acetone- $\text{d}_6$ ) of  $[\mathbf{7}]\text{CF}_3\text{SO}_3$ .

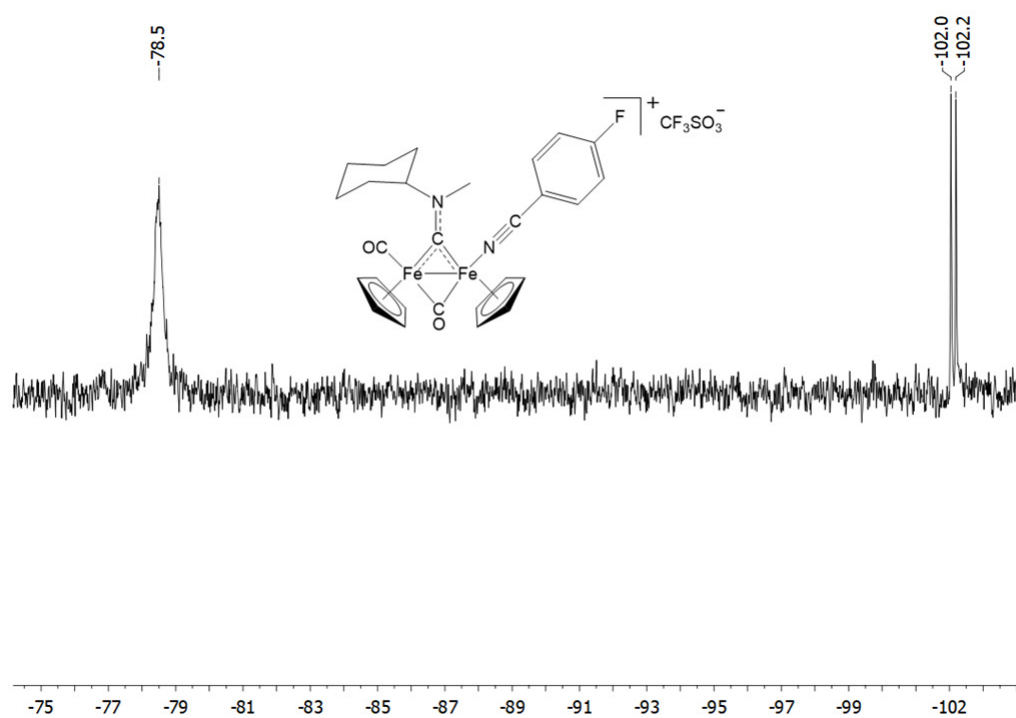



**Figure S14.**  $^1\text{H}$  NMR spectrum (401 MHz, acetone- $d_6$ ) of  $[\mathbf{8}]\text{CF}_3\text{SO}_3$ .

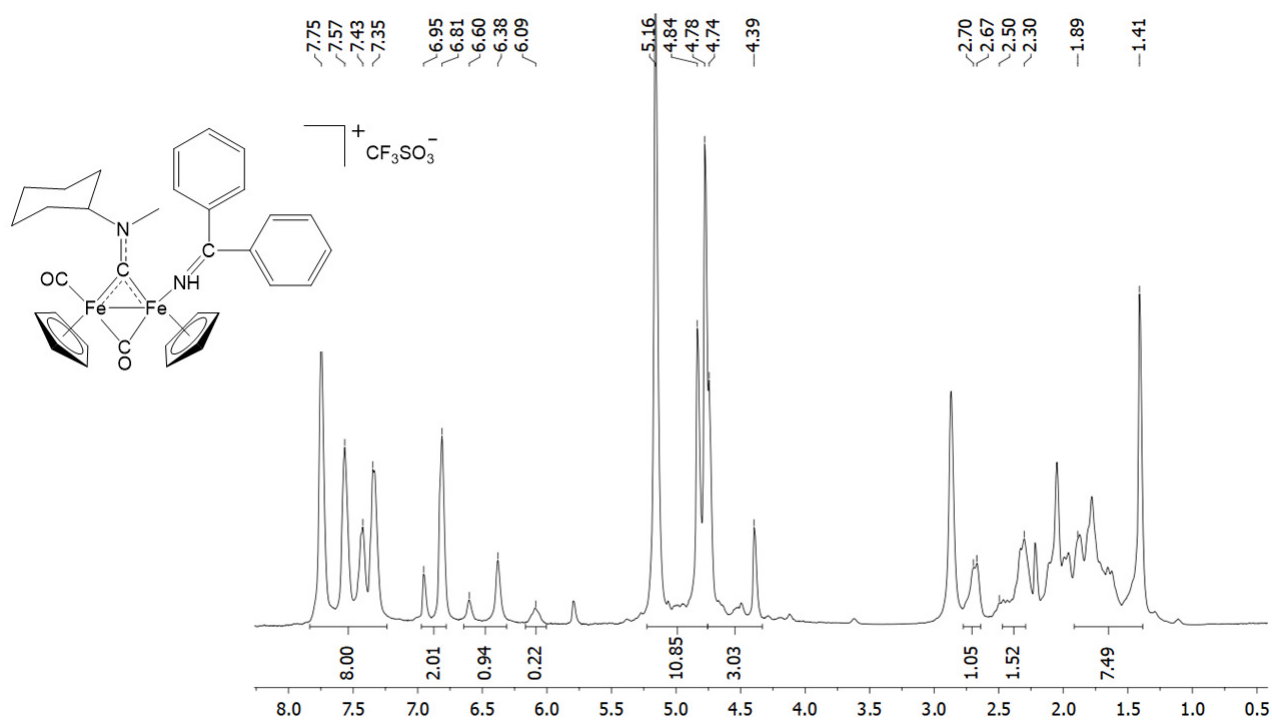

**Figure S15.**  $^{13}\text{C}\{^1\text{H}\}$  NMR spectrum (101 MHz, acetone- $d_6$ ) of  $[\mathbf{8}]\text{CF}_3\text{SO}_3$ .

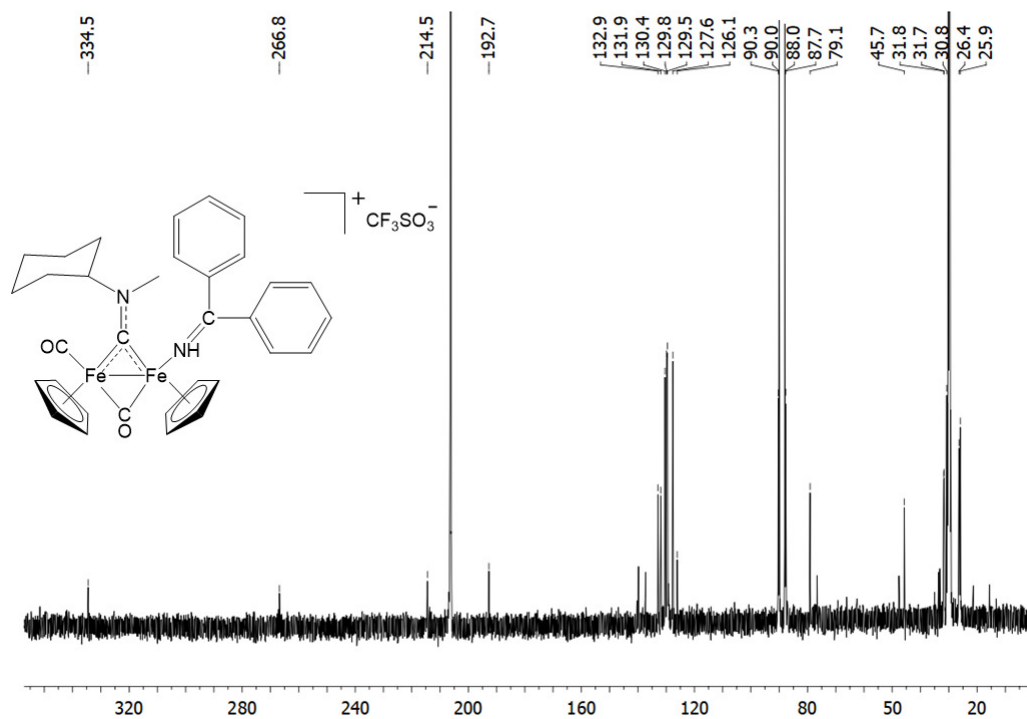

**Figure S18.**  $^1\text{H}$  NMR spectrum (401 MHz, acetone- $d_6$ ) of **[9]** $\text{CF}_3\text{SO}_3$ .

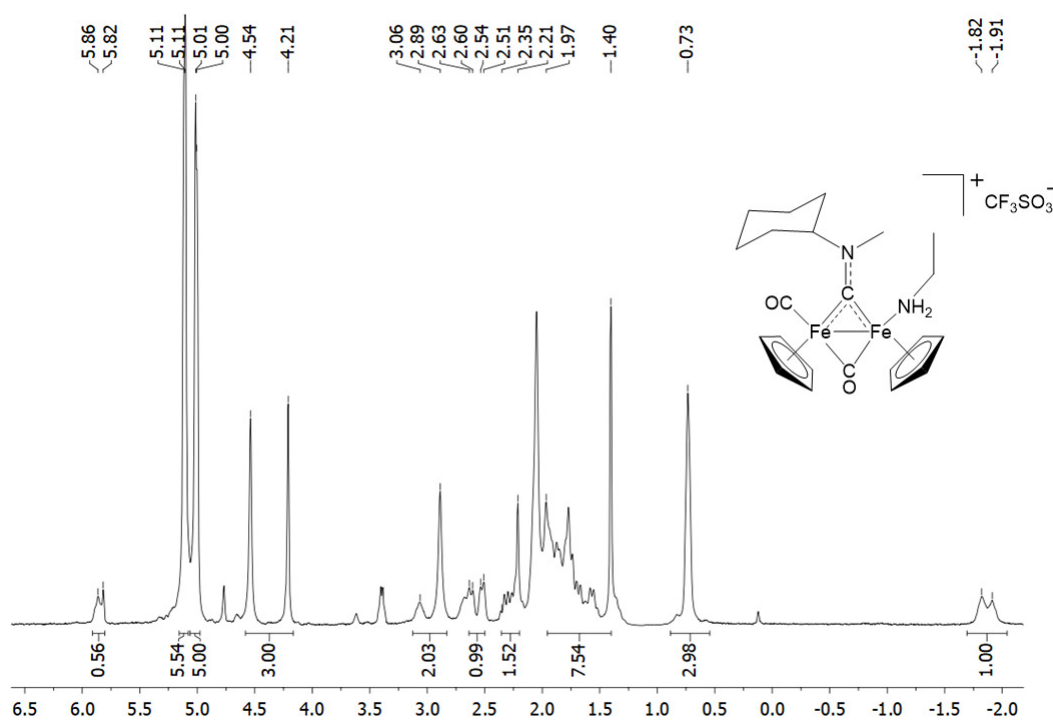

**Figure S19.**  $^{13}\text{C}\{^1\text{H}\}$  NMR spectrum (101 MHz, acetone- $d_6$ ) of **[9]** $\text{CF}_3\text{SO}_3$ .

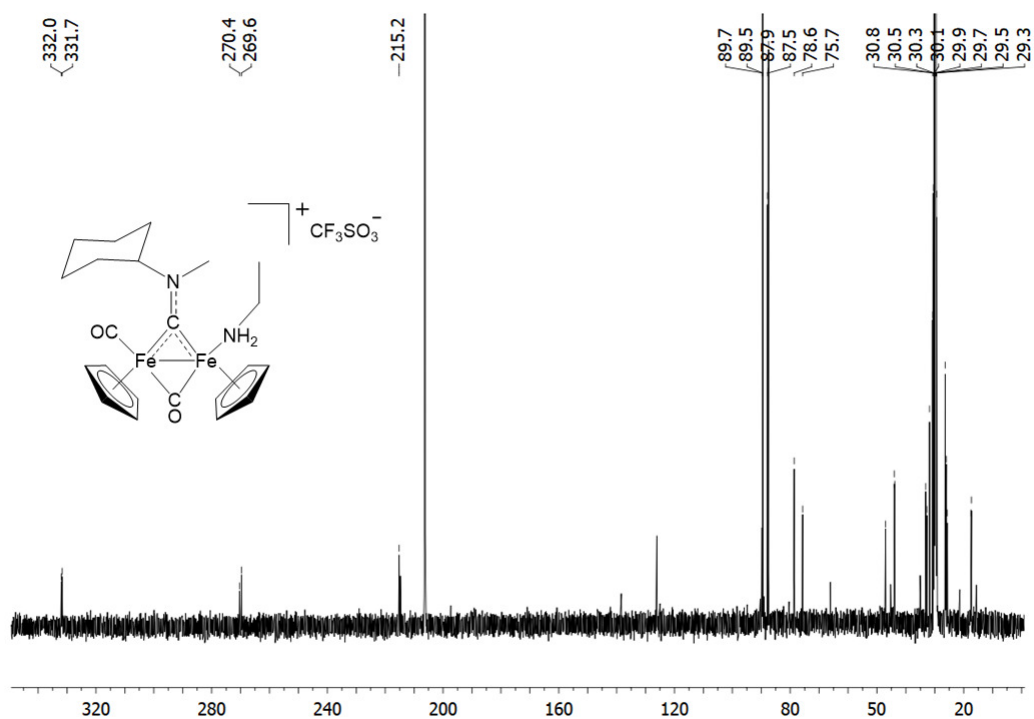

**Figure S20.**  $^1\text{H}$  NMR spectrum (401 MHz, acetone- $d_6$ ) of  $[\mathbf{10}]\text{CF}_3\text{SO}_3$ .

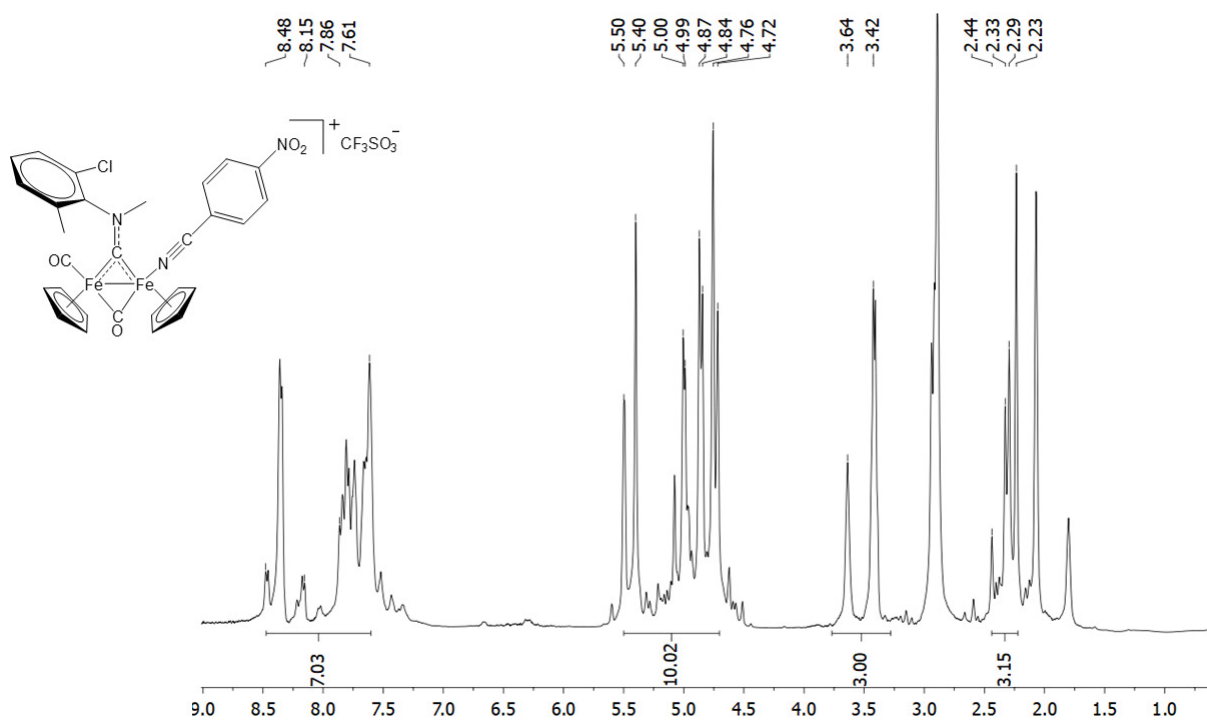

**Figure S21.**  $^{13}\text{C}\{^1\text{H}\}$  NMR spectrum (101 MHz, acetone- $d_6$ ) of  $[\mathbf{10}]\text{CF}_3\text{SO}_3$ .

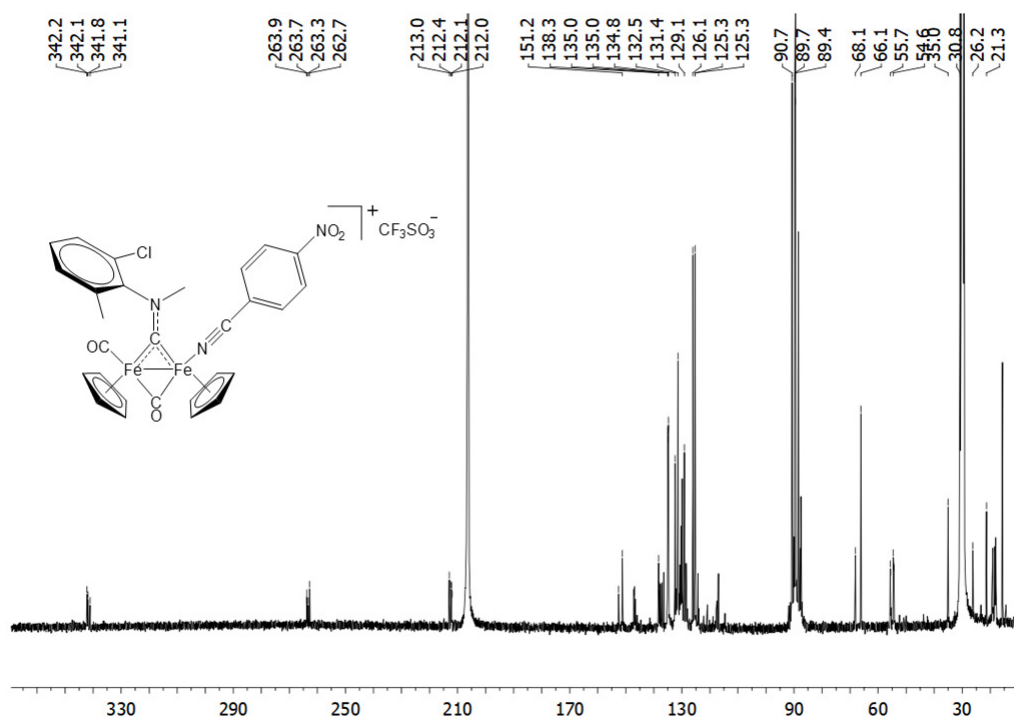

**Figure S22.**  $^1\text{H}$  NMR spectrum (401 MHz, acetone- $d_6$ ) of  $[\mathbf{11}]\text{CF}_3\text{SO}_3$ .

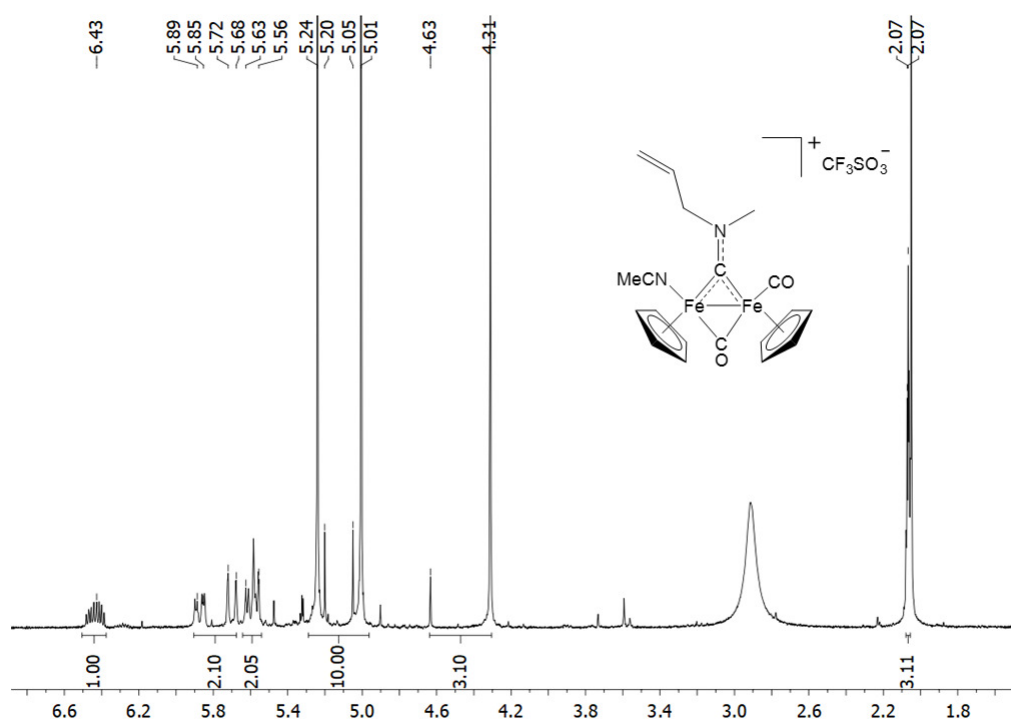

**Figure S23.**  $^{13}\text{C}\{^1\text{H}\}$  NMR spectrum (101 MHz, acetone- $d_6$ ) of  $[\mathbf{11}]\text{CF}_3\text{SO}_3$ .

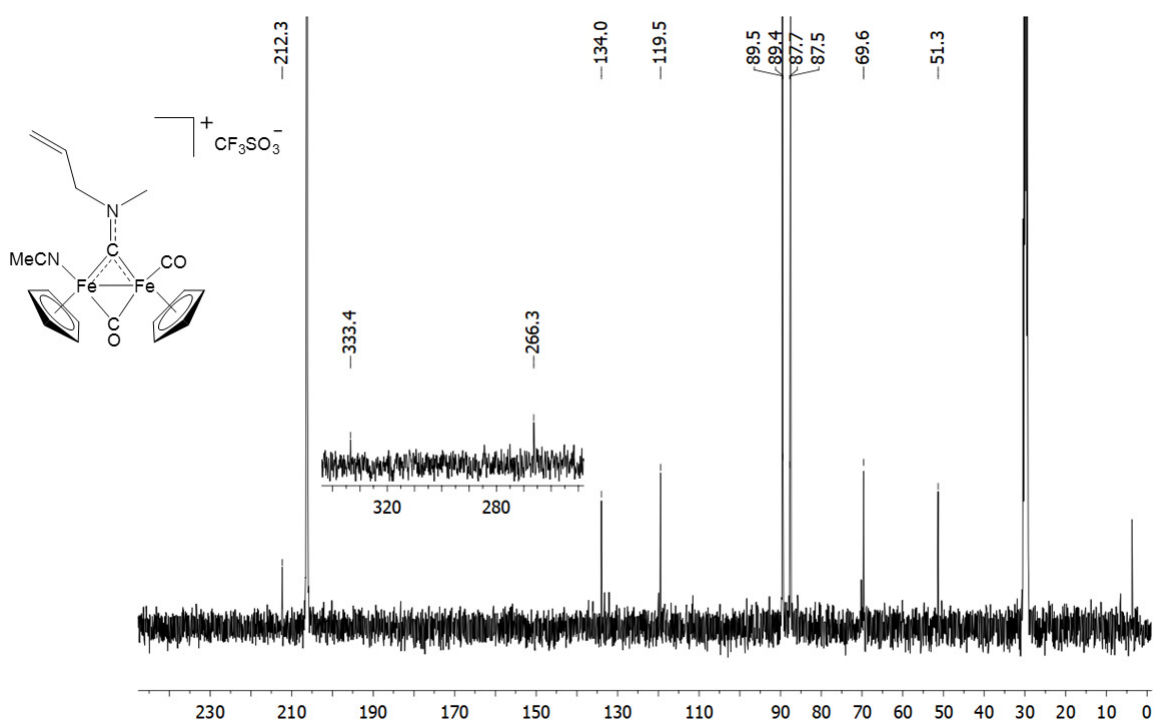

**Figure S24.**  $^1\text{H}$  NMR spectrum (401 MHz, acetone- $d_6$ ) of  $[\mathbf{12}]\text{CF}_3\text{SO}_3$ .

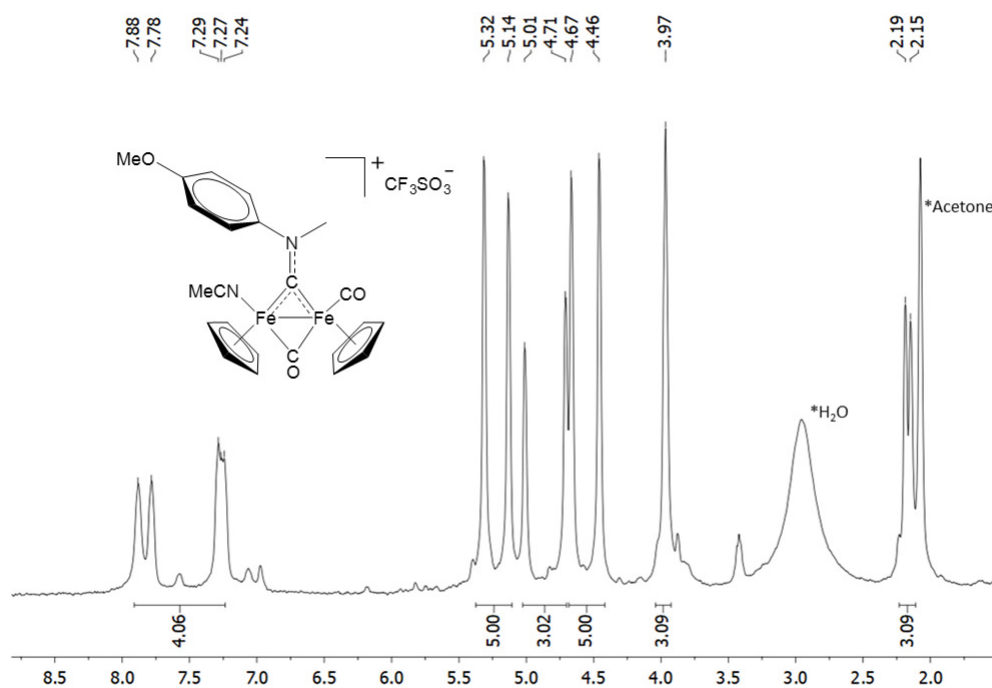

**Figure S25.**  $^{13}\text{C}\{^1\text{H}\}$  NMR spectrum (101 MHz, acetone- $d_6$ ) of  $[\mathbf{12}]\text{CF}_3\text{SO}_3$ .

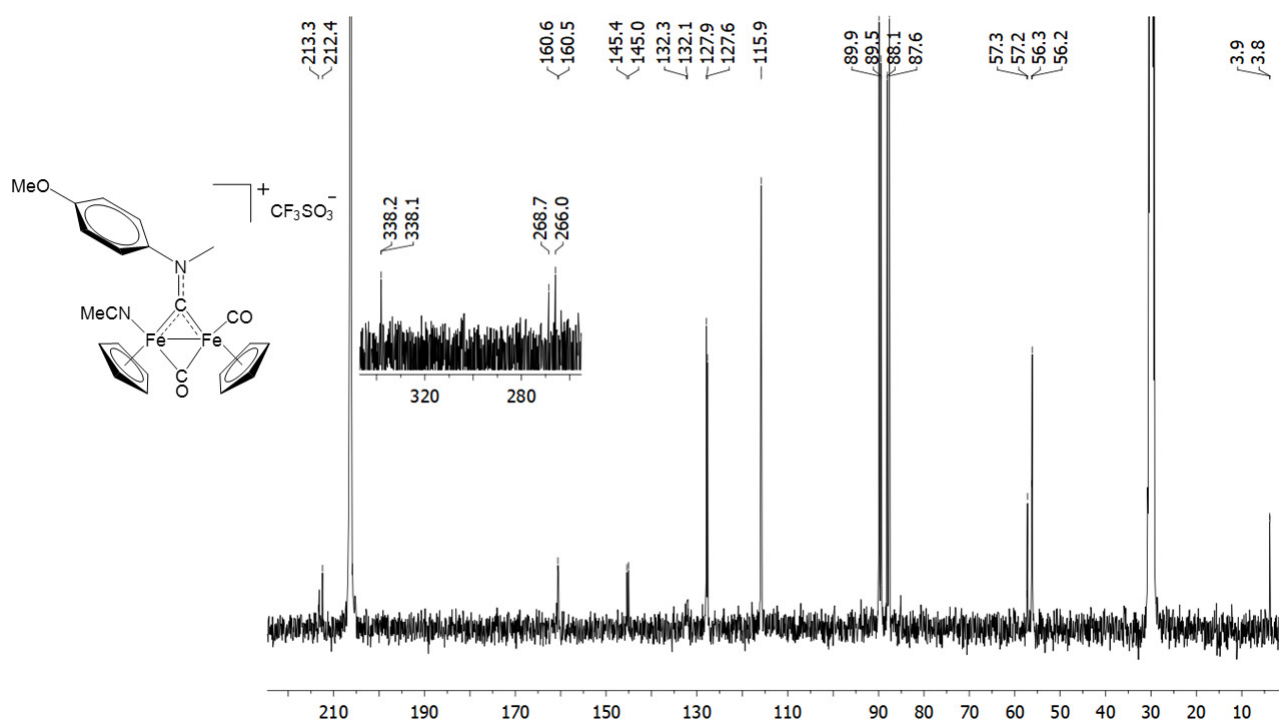

**Figure S26.** Solid state IR spectrum of **[2]CF<sub>3</sub>SO<sub>3</sub>**.

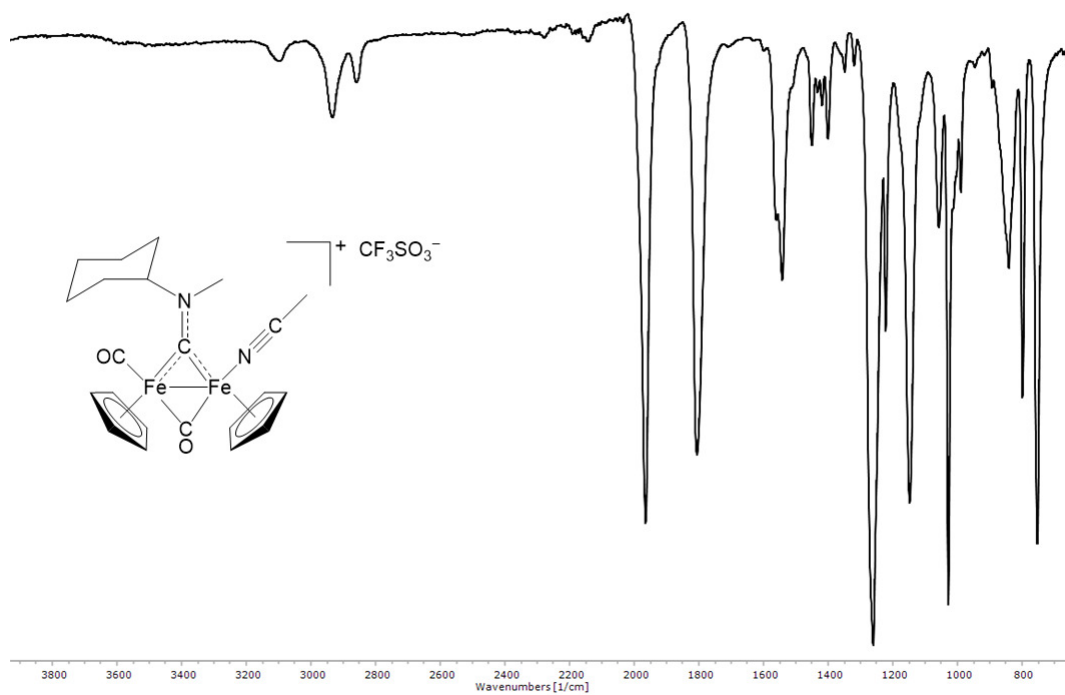

**Figure S27.** Solution (CH<sub>2</sub>Cl<sub>2</sub>) IR spectrum of **[2]CF<sub>3</sub>SO<sub>3</sub>**.

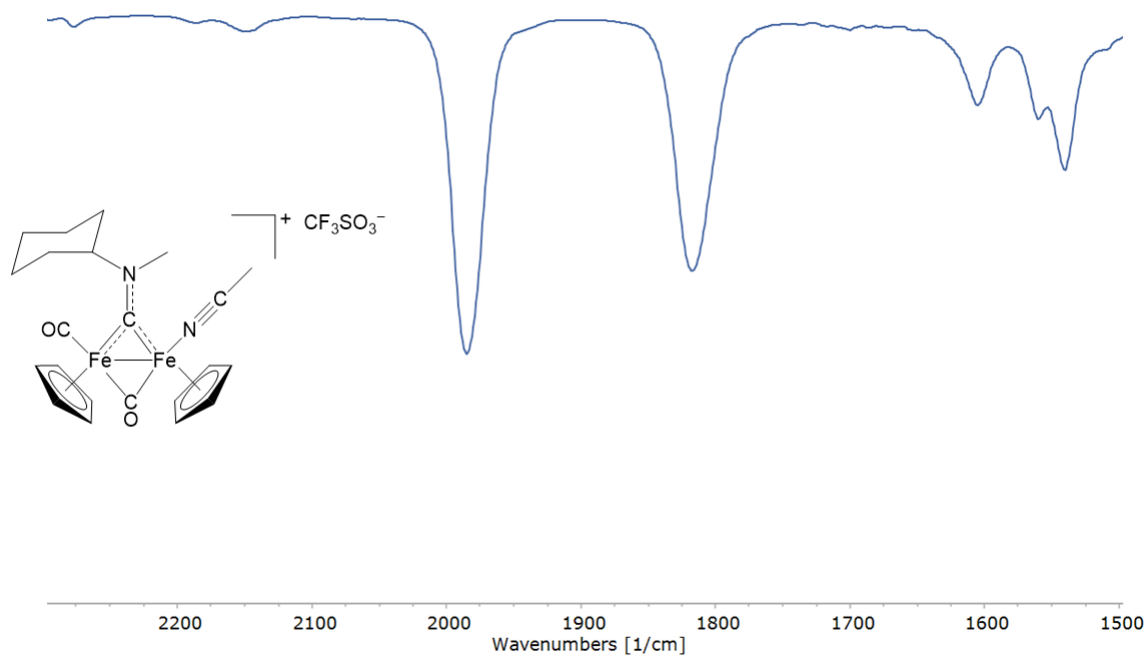

**Figure S28.** Solid state IR spectrum of **[3]CF<sub>3</sub>SO<sub>3</sub>**.

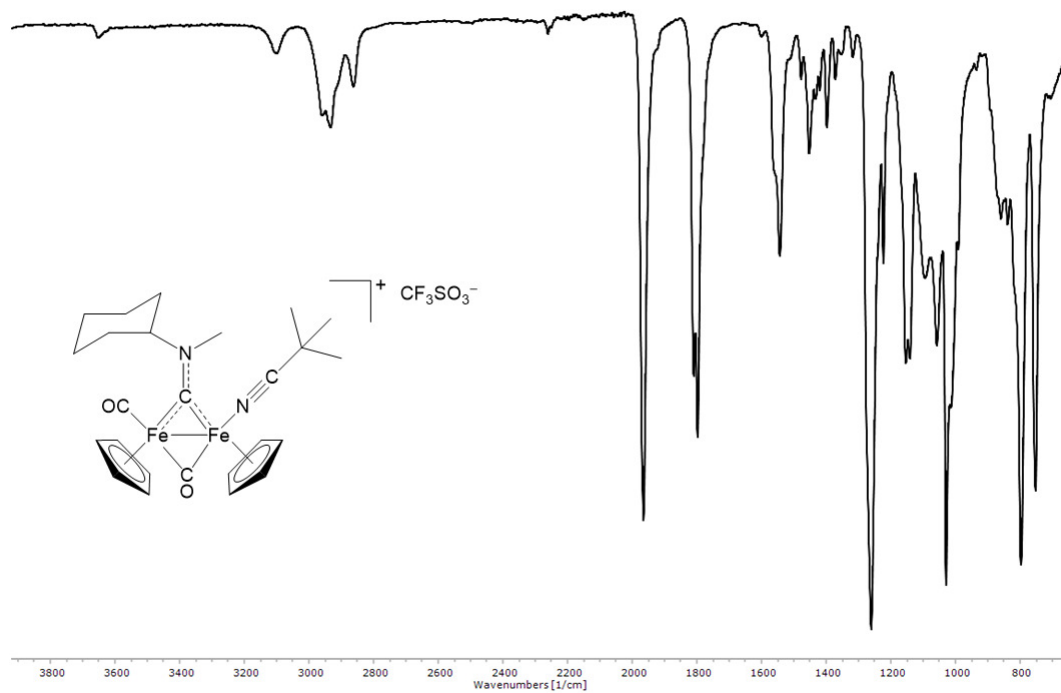

**Figure S29.** Solution (CH<sub>2</sub>Cl<sub>2</sub>) IR spectrum of **[3]CF<sub>3</sub>SO<sub>3</sub>**.

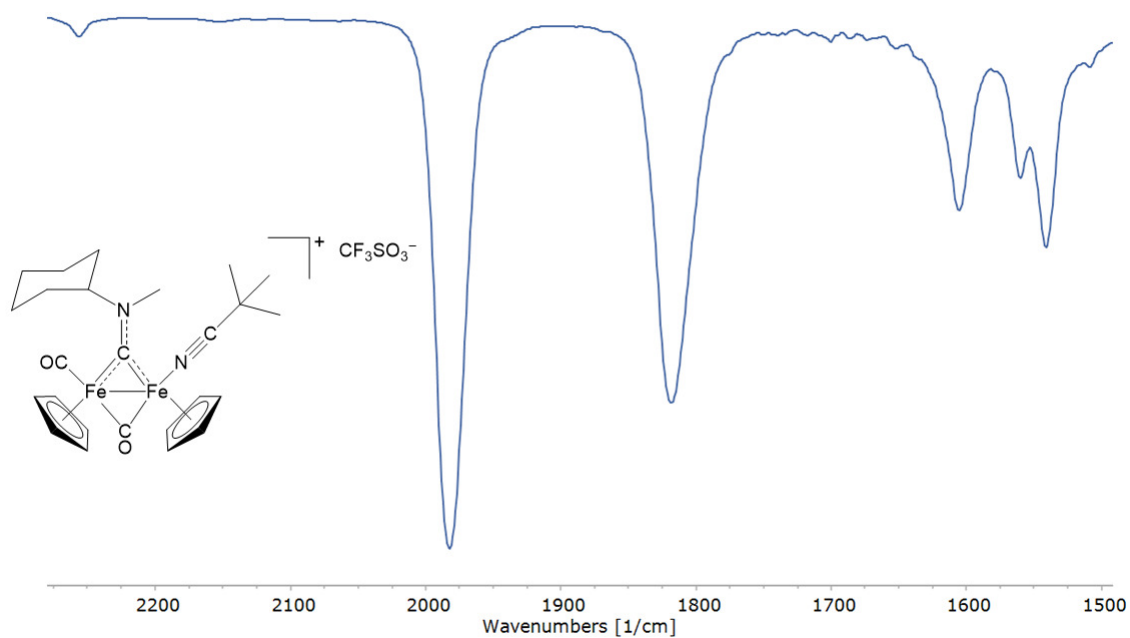

**Figure S30.** Solid state IR spectrum of **[4]CF<sub>3</sub>SO<sub>3</sub>**.

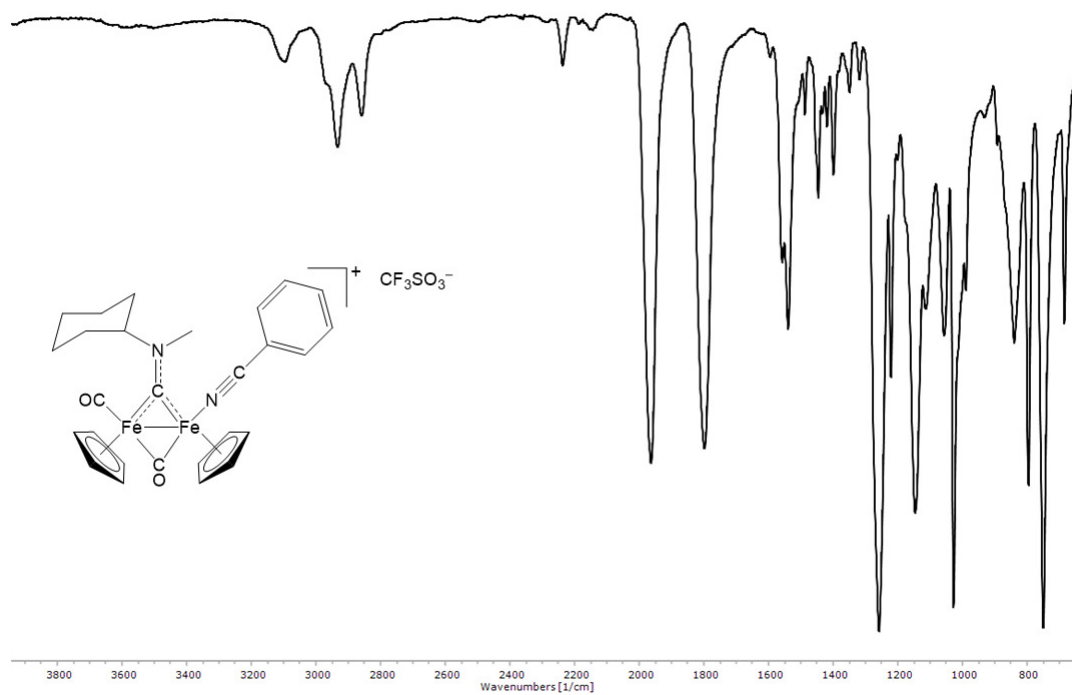

**Figure S31.** Solution (CH<sub>2</sub>Cl<sub>2</sub>) IR spectrum of **[4]CF<sub>3</sub>SO<sub>3</sub>**.

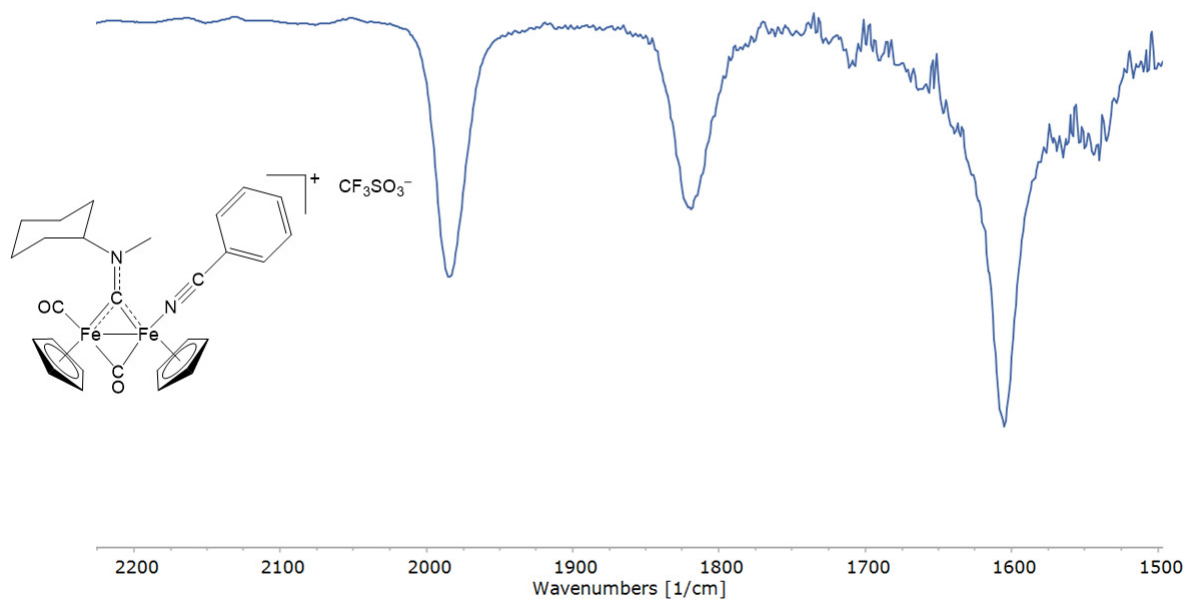



**Figure S32.** Solid state IR spectrum of **[5]CF<sub>3</sub>SO<sub>3</sub>**.

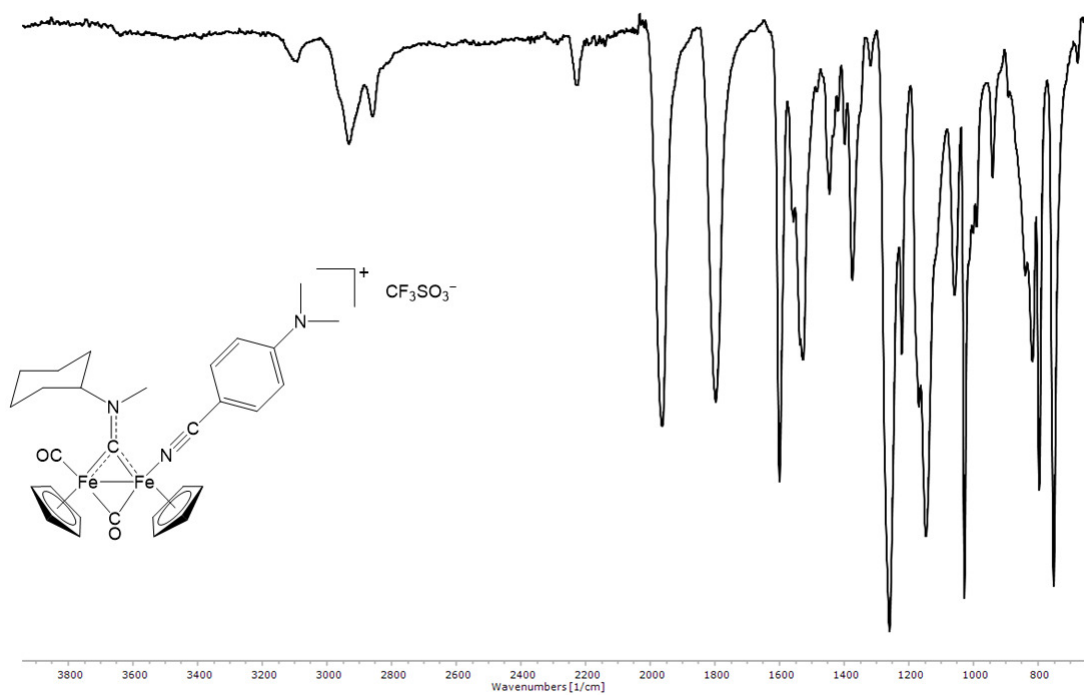

**Figure S33.** Solution (CH<sub>2</sub>Cl<sub>2</sub>) IR spectrum of **[5]CF<sub>3</sub>SO<sub>3</sub>**.

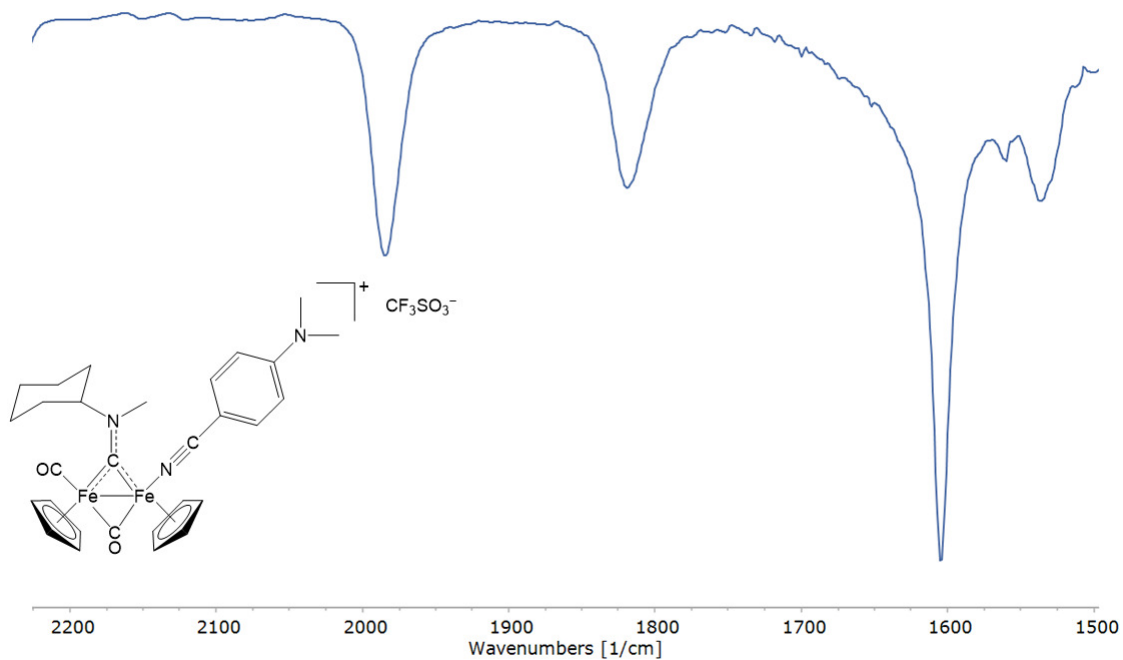

**Figure S34.** Solid state IR spectrum of **[6]CF<sub>3</sub>SO<sub>3</sub>**.

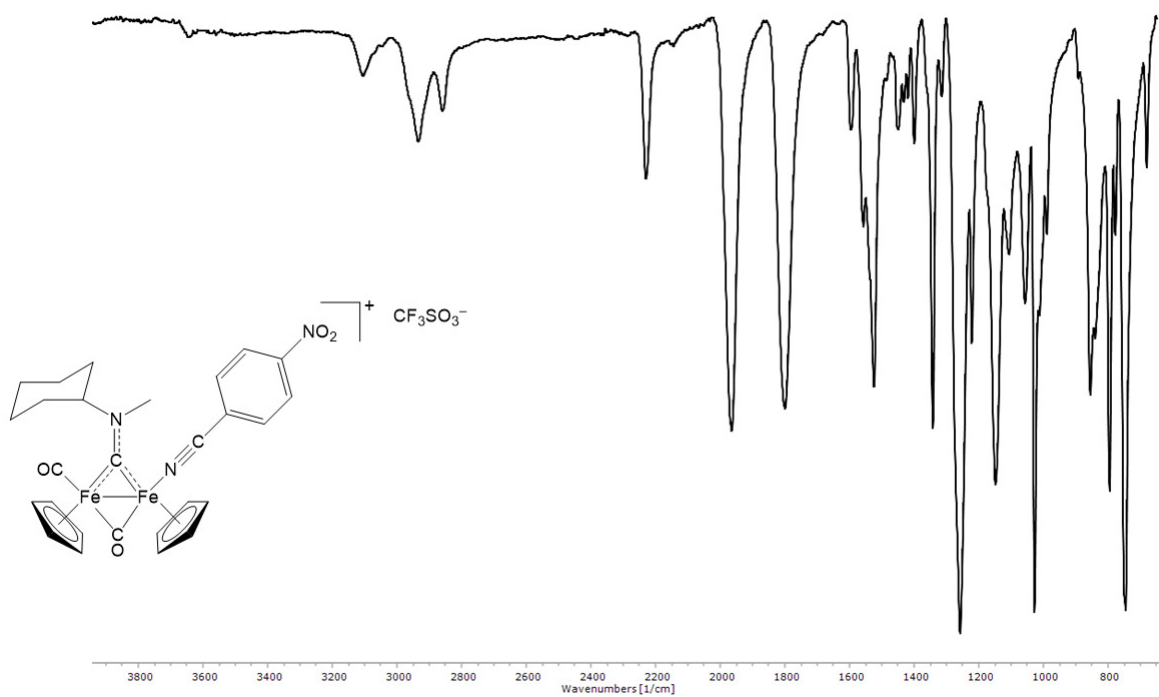

**Figure S35.** Solution (CH<sub>2</sub>Cl<sub>2</sub>) IR spectrum of **[6]CF<sub>3</sub>SO<sub>3</sub>**.

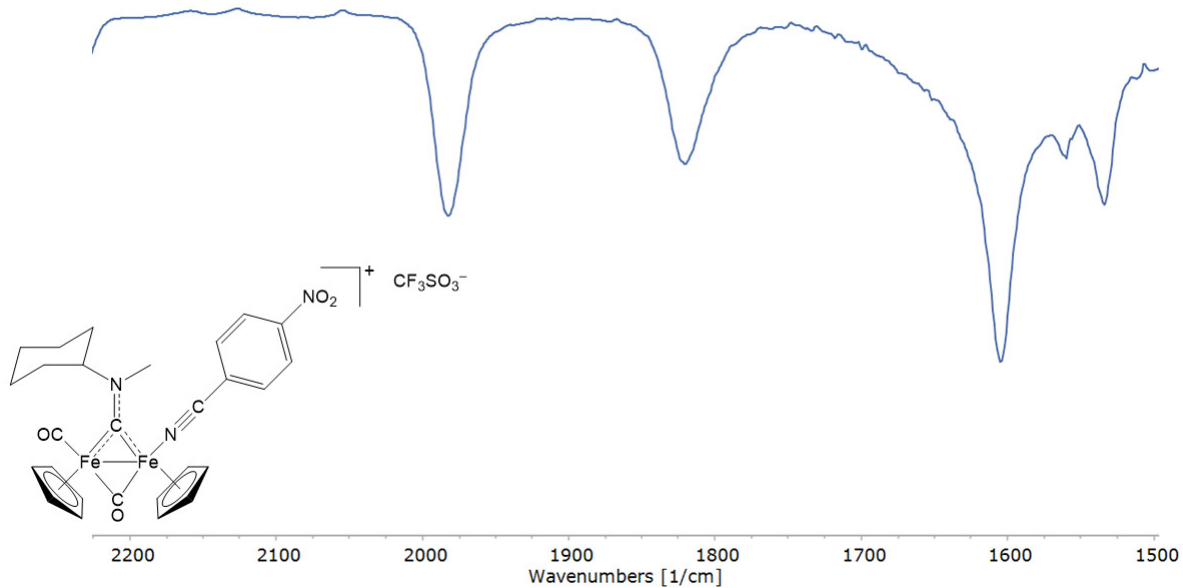

**Figure S36.** Solid state IR spectrum of **[7]CF<sub>3</sub>SO<sub>3</sub>**.

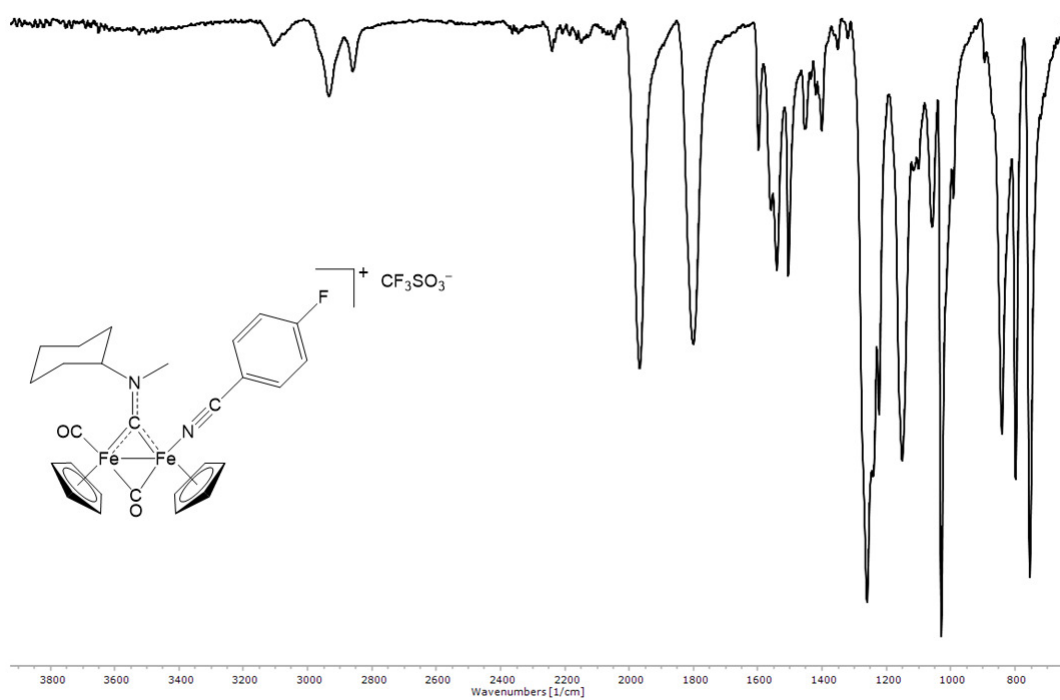

**Figure S37.** Solution (CH<sub>2</sub>Cl<sub>2</sub>) IR spectrum of **[7]CF<sub>3</sub>SO<sub>3</sub>**.

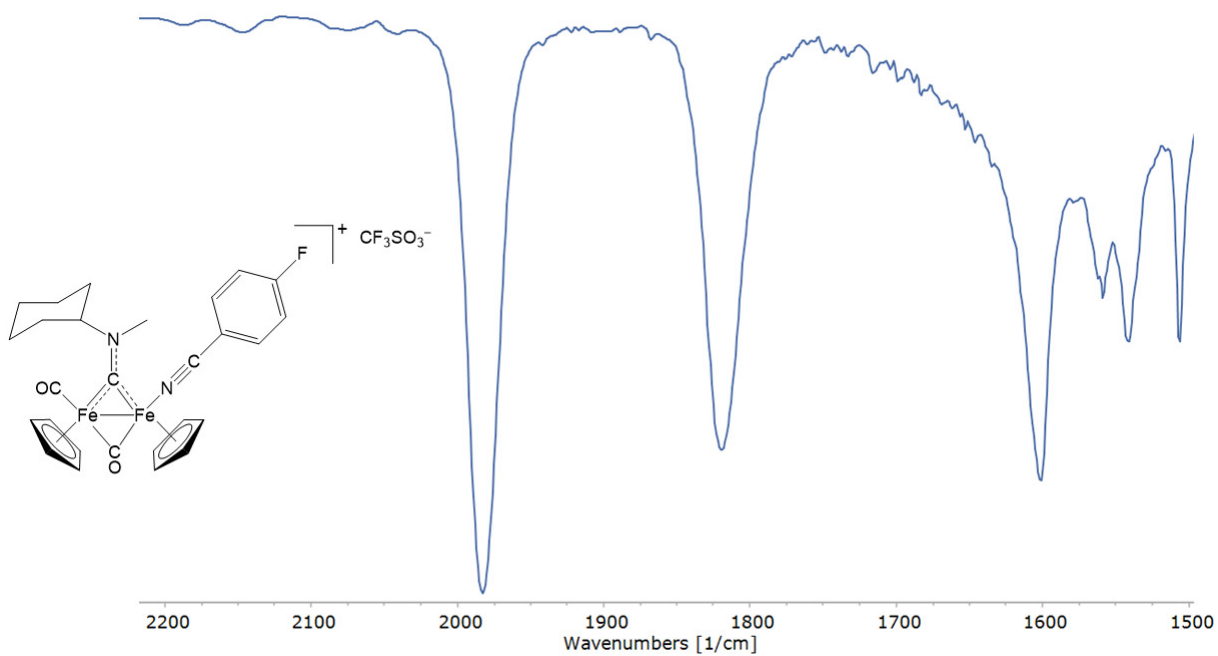

**Figure S38.** Solid state IR spectrum of **[8]CF<sub>3</sub>SO<sub>3</sub>**.

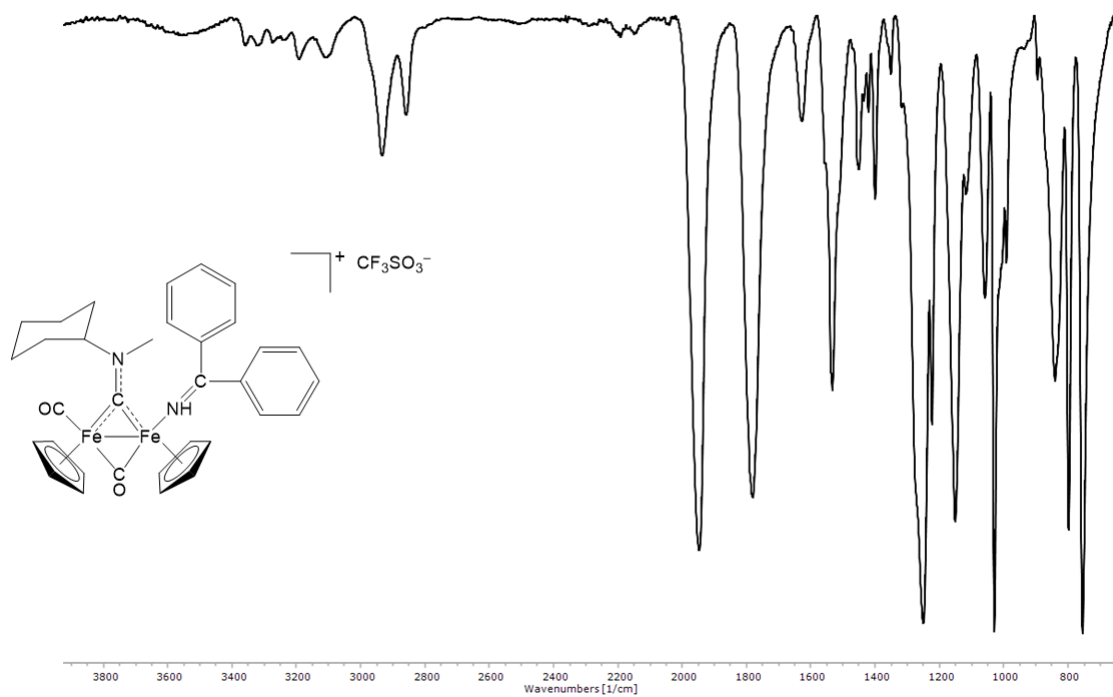

**Figure S39.** Solution (CH<sub>2</sub>Cl<sub>2</sub>) IR spectrum of **[8]CF<sub>3</sub>SO<sub>3</sub>**.

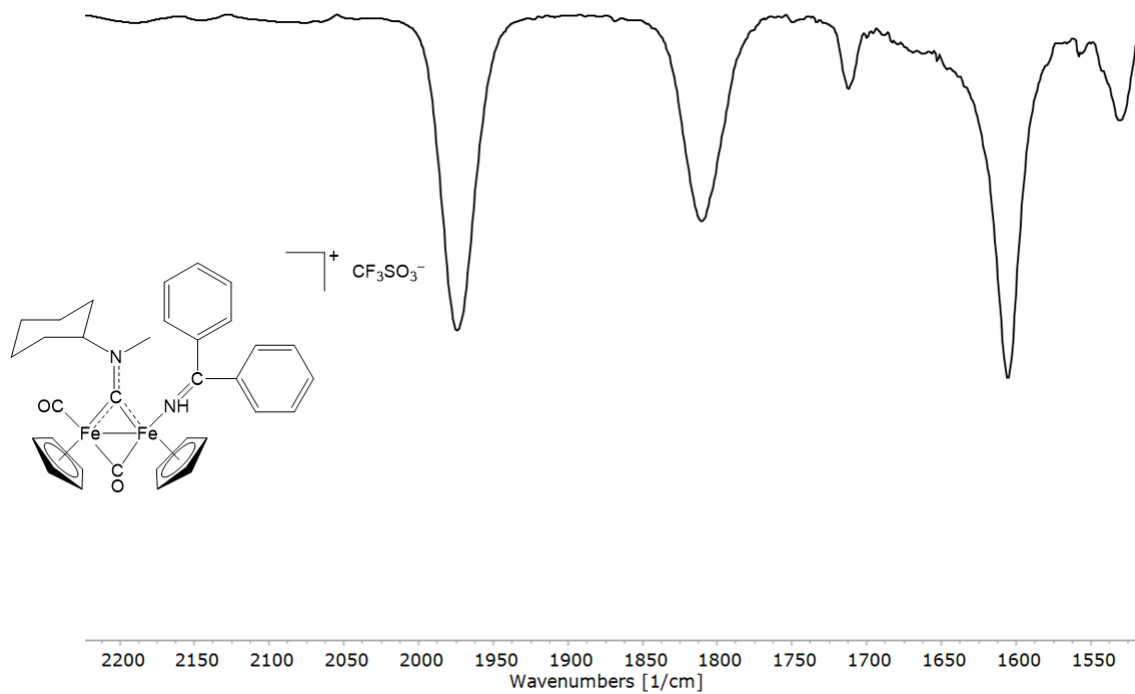

**Figure S40.** Solid state IR spectrum of **[9]CF<sub>3</sub>SO<sub>3</sub>**.

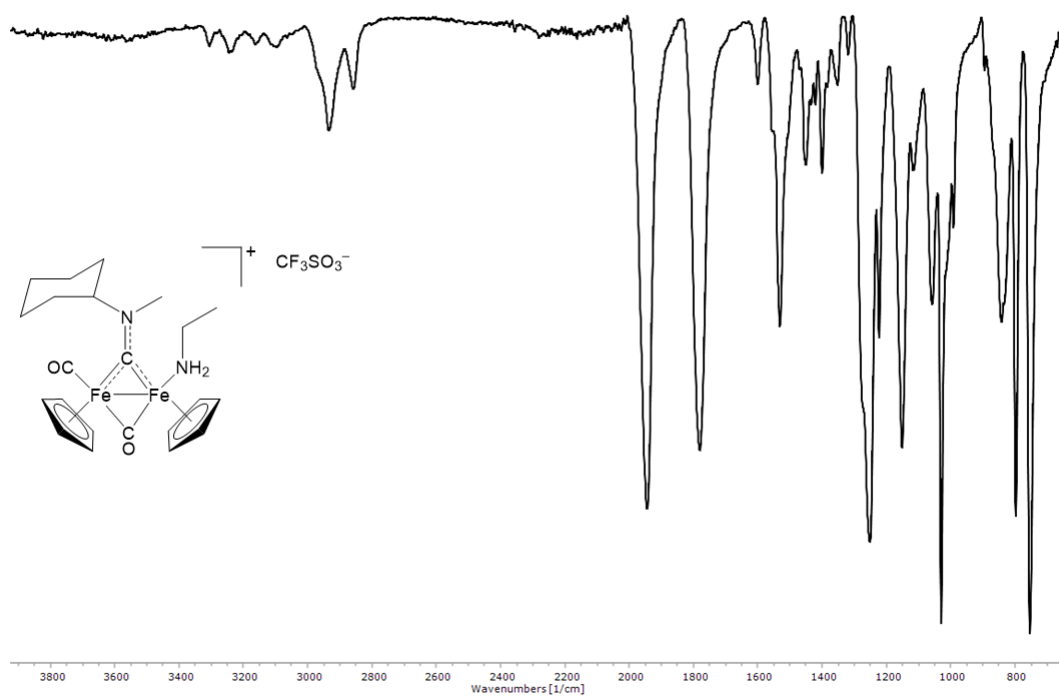

**Figure S41.** Solution (CH<sub>2</sub>Cl<sub>2</sub>) IR spectrum of **[9]CF<sub>3</sub>SO<sub>3</sub>**.

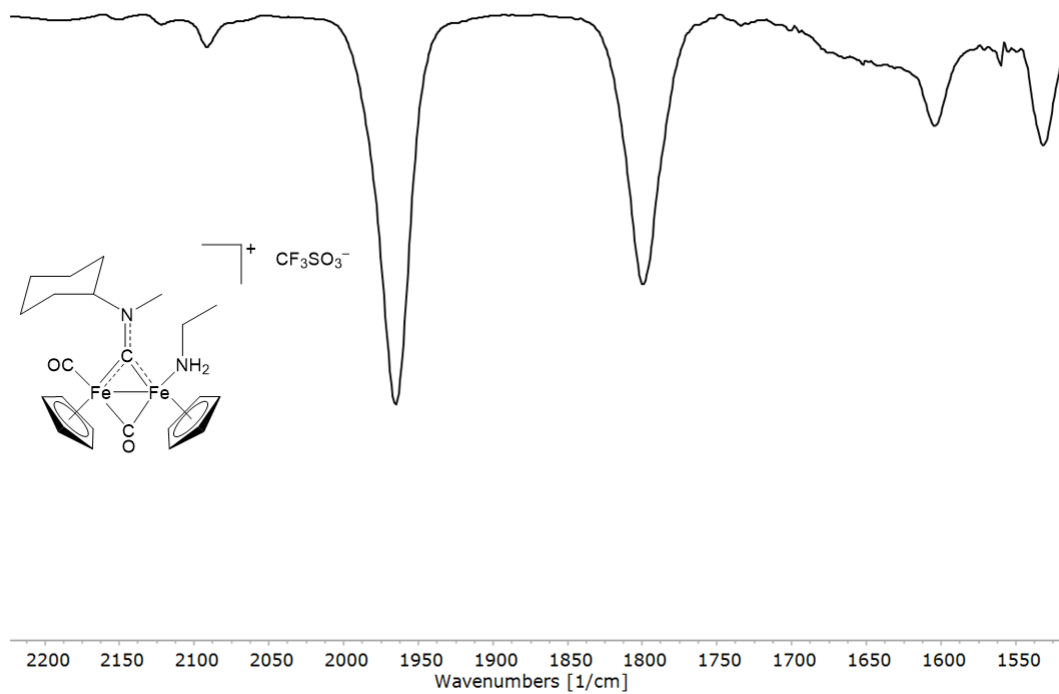

**Figure S42.** Solid state IR spectrum of  $[\mathbf{10}]\text{CF}_3\text{SO}_3$ .

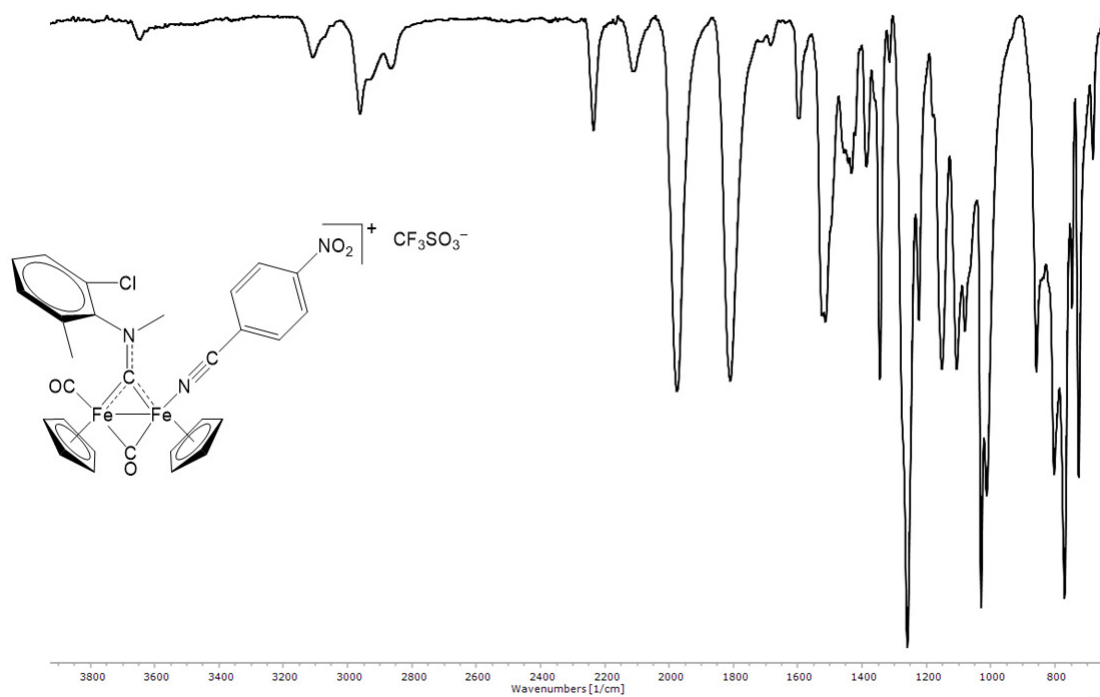

**Figure S43.** Solution ( $\text{CH}_2\text{Cl}_2$ ) IR spectrum of  $[\mathbf{10}]\text{CF}_3\text{SO}_3$ .

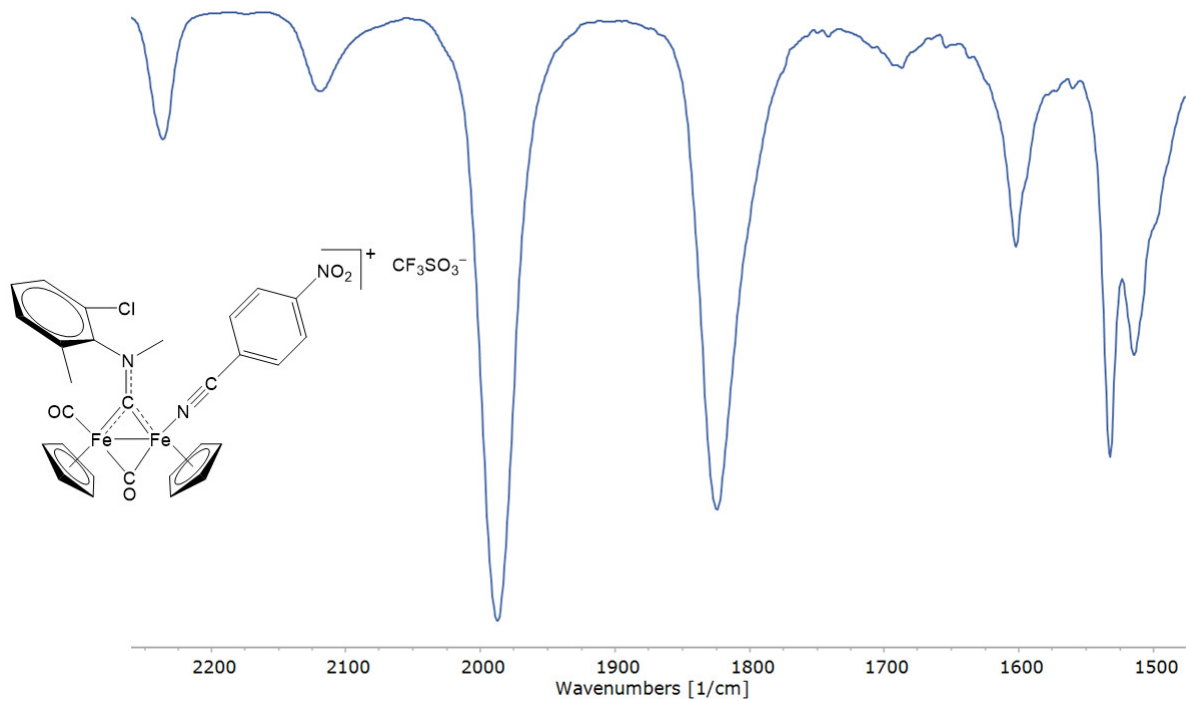

**Figure S44.** Solid state IR spectrum of **[11]CF<sub>3</sub>SO<sub>3</sub>**.

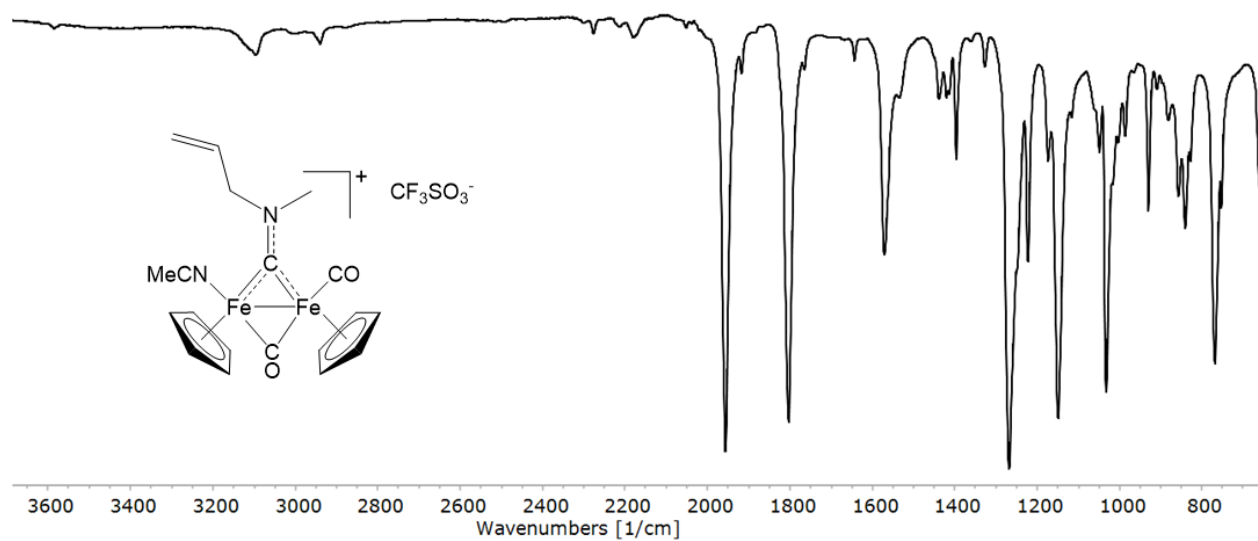

**Figure S45.** Solution ( $\text{CH}_2\text{Cl}_2$ ) IR spectrum of **[11]CF<sub>3</sub>SO<sub>3</sub>**.

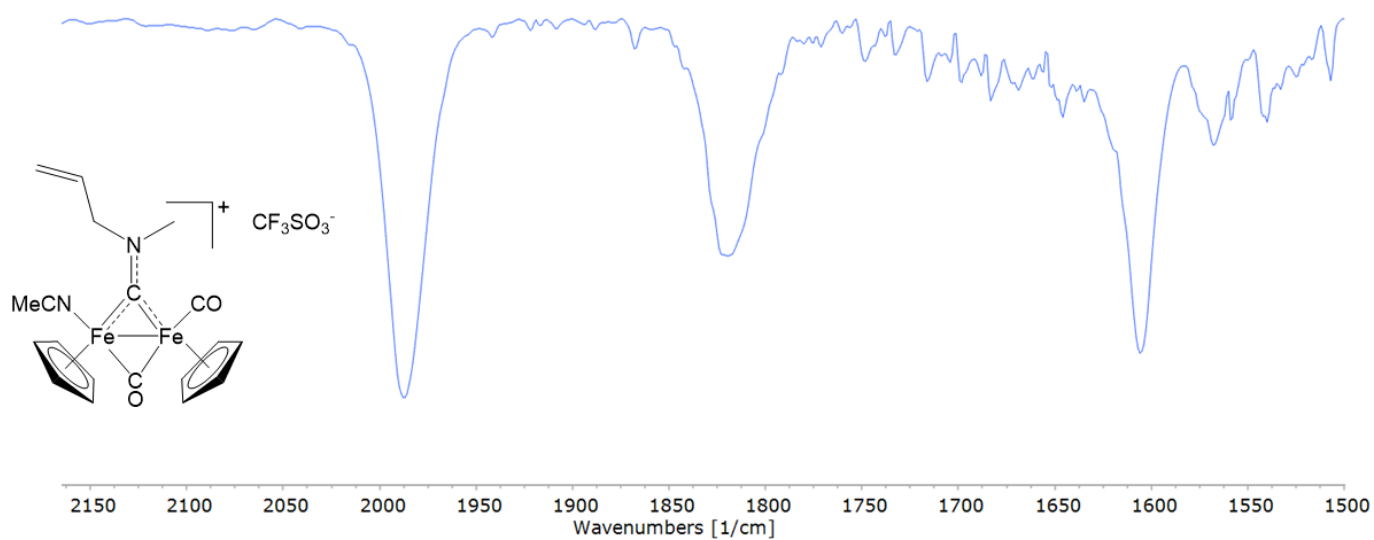

**Figure S46.** Solid state IR spectrum of **[12]CF<sub>3</sub>SO<sub>3</sub>**.

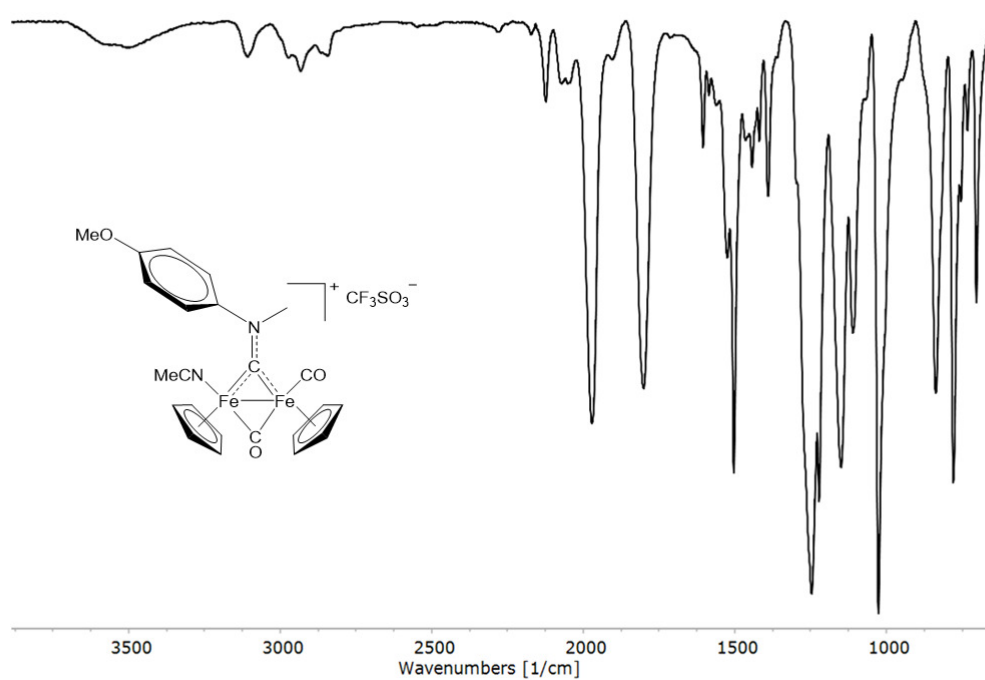

**Figure S47.** Solution (CH<sub>2</sub>Cl<sub>2</sub>) IR spectrum of **[12]CF<sub>3</sub>SO<sub>3</sub>**.

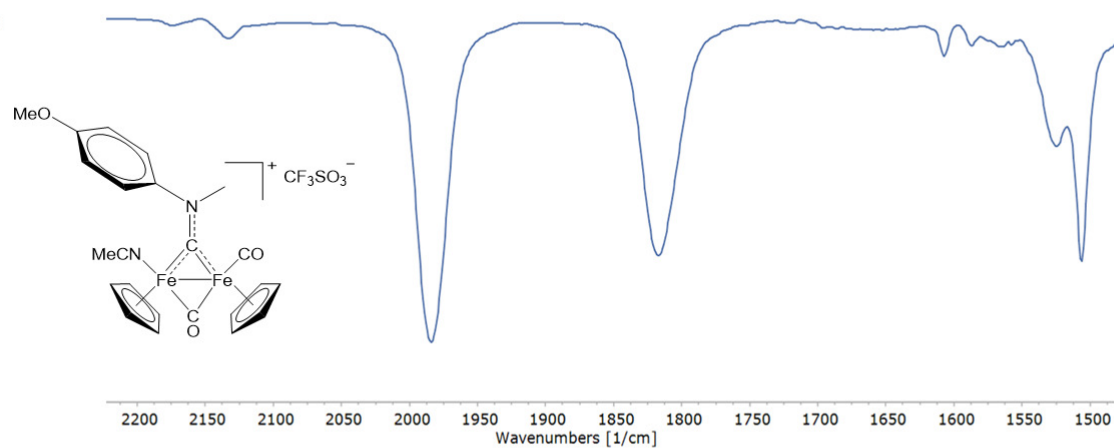



**Figure S48.** Isodensity surface plots (isodensity value 8 me a.u.<sup>-3</sup>) for the deformation maps relative to  $\Delta\rho_k$  of the  $[\text{Fe}_2\text{Cp}_2(\text{CO})(\text{CNMe}_2)(\text{NCMe})]^+\cdots[\text{CO}]$  interaction (complex **[M1]**<sup>+</sup>). The charge flux is red  $\rightarrow$  blue.  $E_{\text{int}} = -65.7$  kcal/mol;  $E_{\text{orb}} = -113.2$  kcal/mol;  $E_{\text{st}} = 55.4$ ;  $E_{\text{disp}} = -7.9$  kcal/mol.

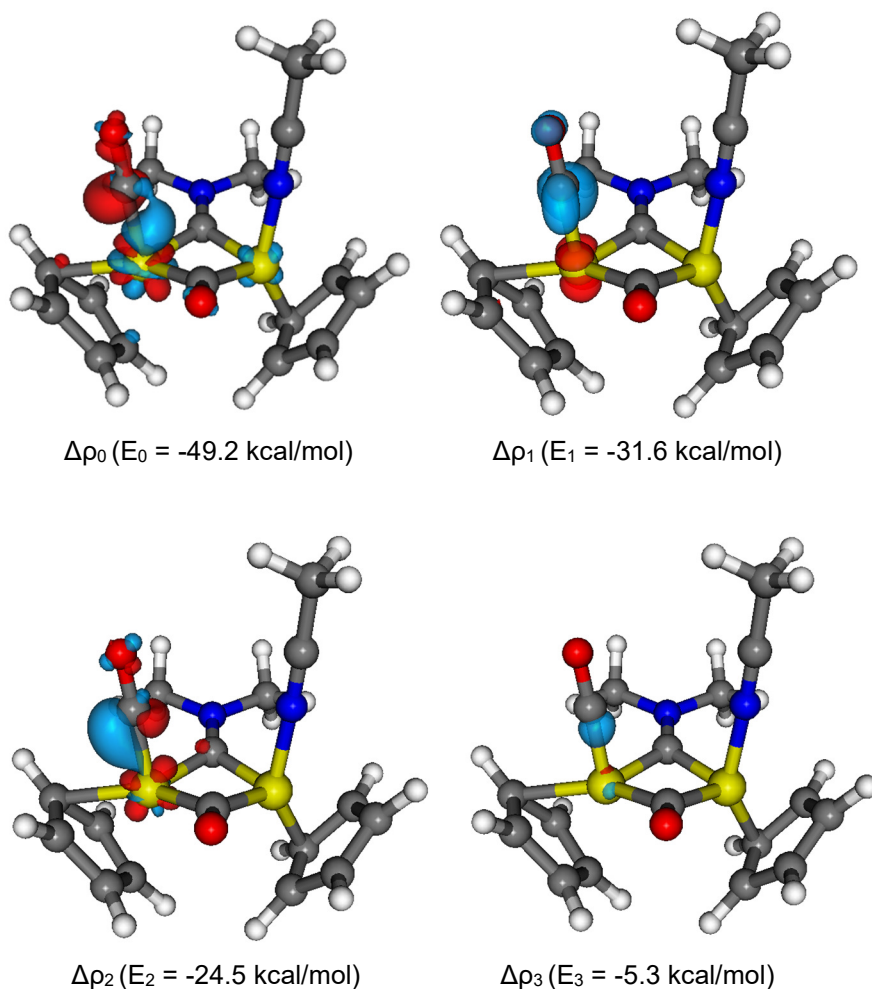

**Figure S49.** Views of the DFT optimized structures of experimental complexes. H atoms have been omitted for clarity.

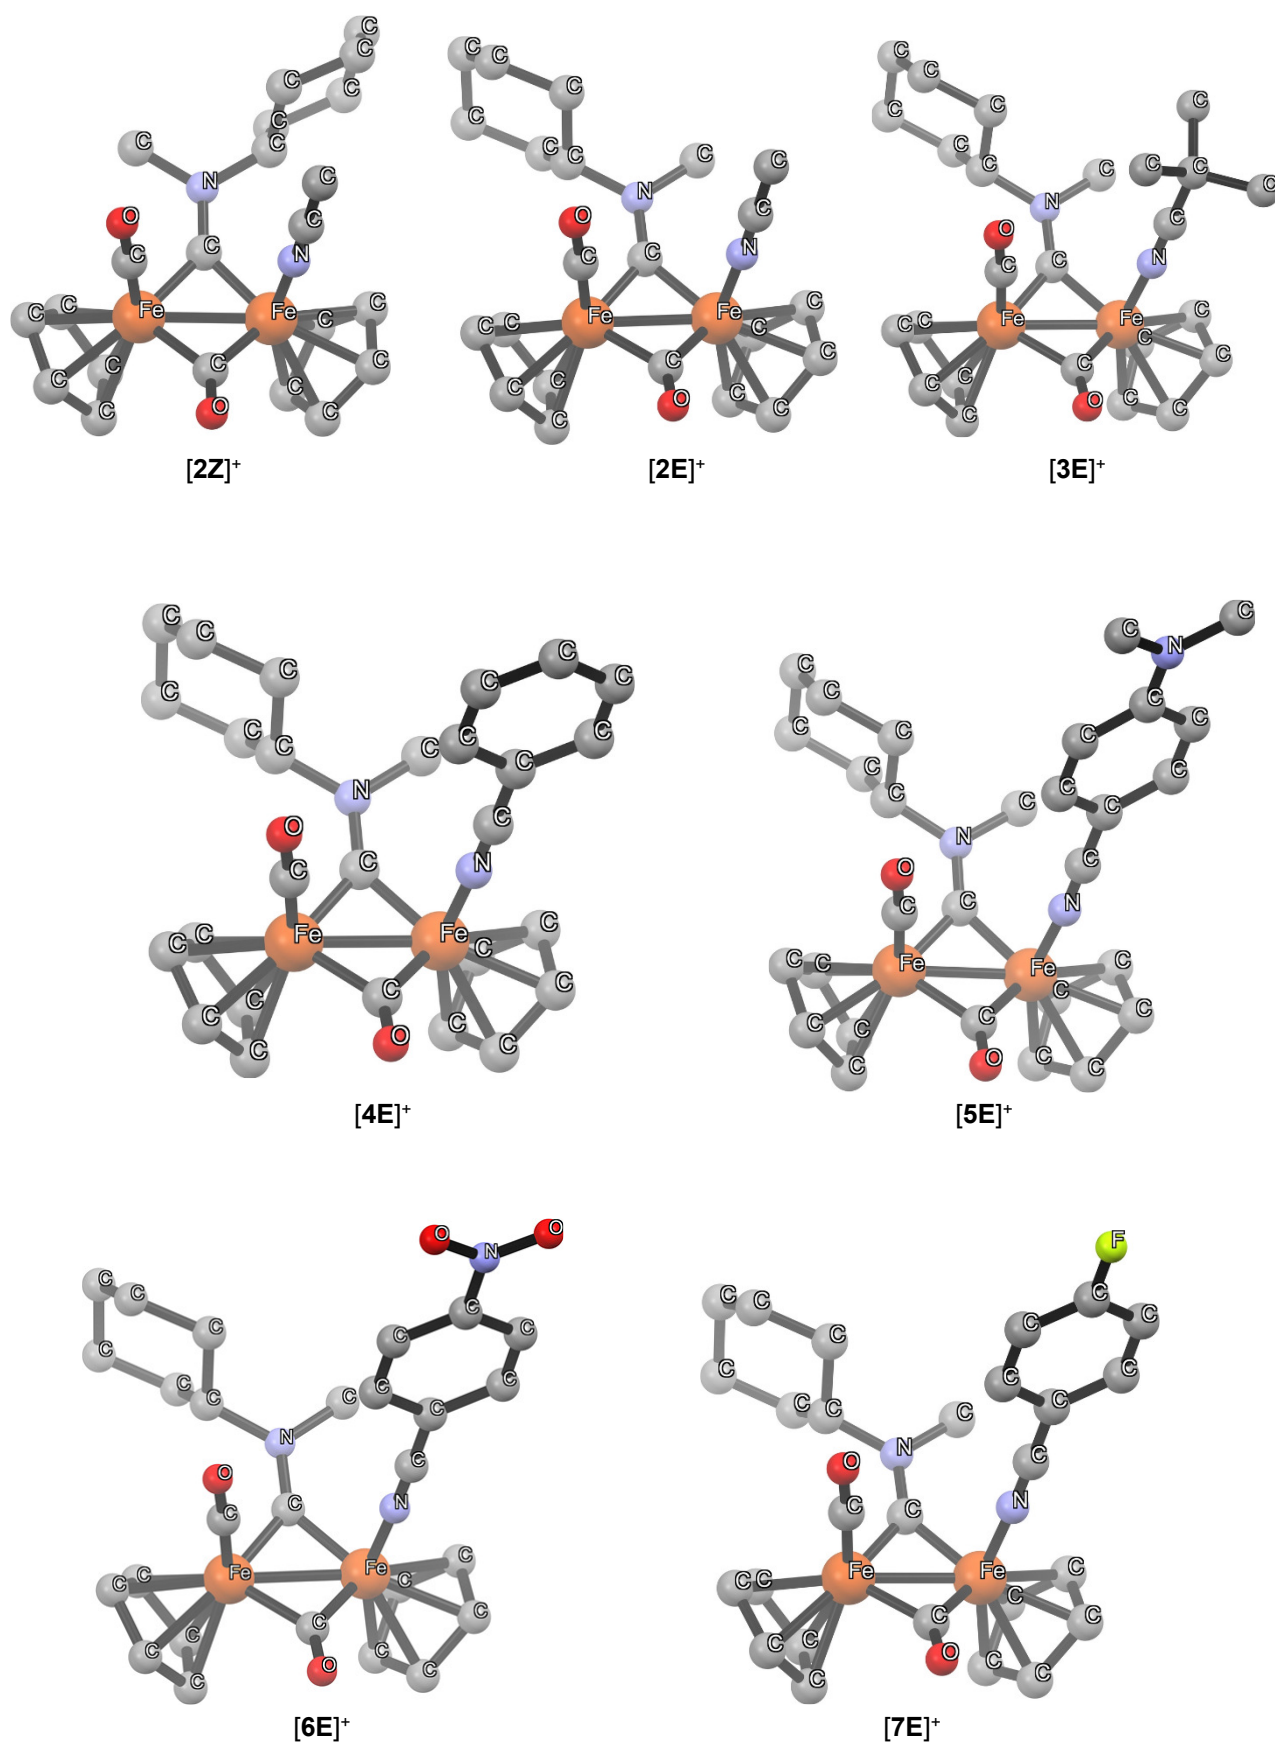

**Figure S50.** Views of the DFT optimized structures of model complexes. H atoms (except those ones belonging to the nitrile ligand, if any) have been omitted for clarity.

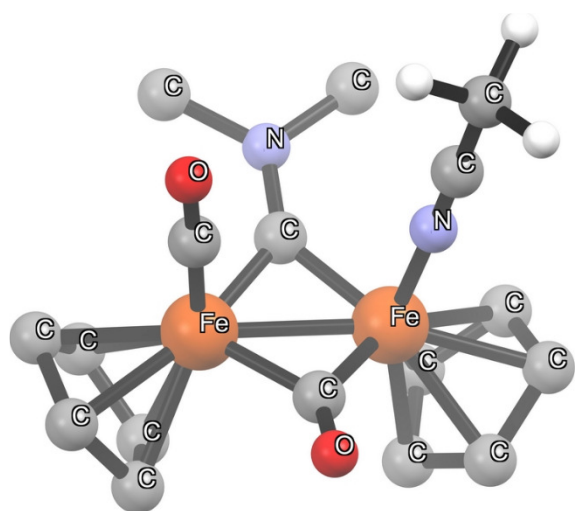

$[\text{Fe}_2\text{Cp}_2(\text{CO})_2\{\mu\text{-CNMe}_2\}(\text{N}\equiv\text{CMe})]^+$ , **[M1]<sup>+</sup>**

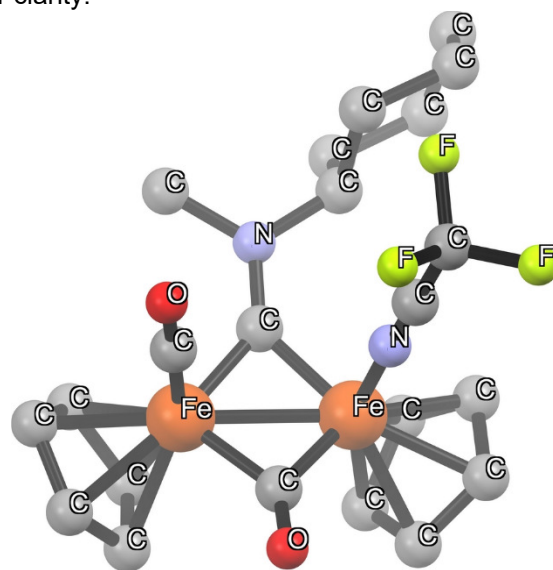

$[\text{Fe}_2\text{Cp}_2(\text{CO})_2\{\mu\text{-CNMe}(\text{Cy})\}(\text{N}\equiv\text{CCF}_3)]^+$ , **[M2]<sup>+</sup>**

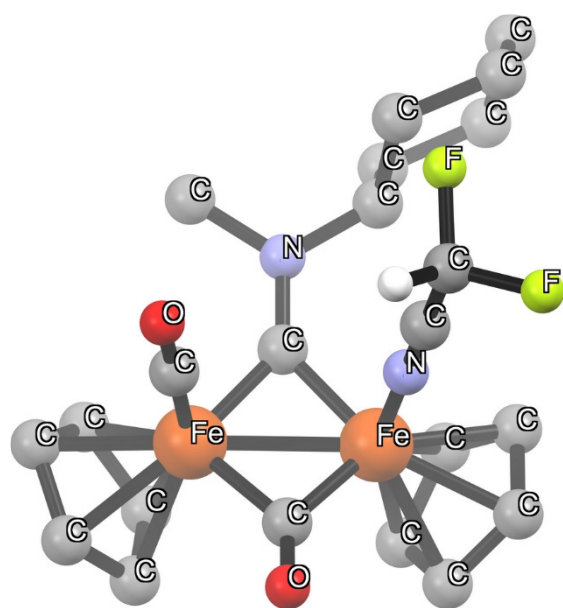

$[\text{Fe}_2\text{Cp}_2(\text{CO})_2\{\mu\text{-CNMe}(\text{Cy})\}(\text{N}\equiv\text{CCHF}_2)]^+$ , **[M3]<sup>+</sup>**

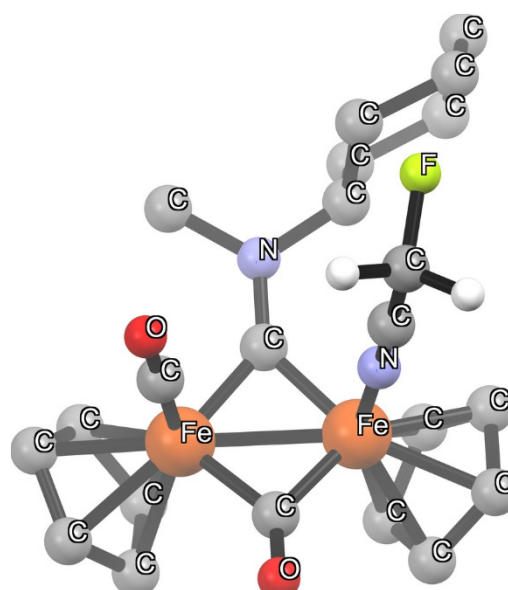

$[\text{Fe}_2\text{Cp}_2(\text{CO})_2\{\mu\text{-CNMe}(\text{Cy})\}(\text{N}\equiv\text{CCH}_2\text{F})]^+$ , **[M4]<sup>+</sup>**

# DFT optimized geometries

## [M1]<sup>+</sup>

|    |                   |                   |                   |
|----|-------------------|-------------------|-------------------|
| Fe | 0.43519305187458  | 2.47399644266526  | -0.36779944578611 |
| Fe | 0.08209635222908  | 0.02856040770164  | 0.02230328438828  |
| C  | 0.53871048335470  | 3.03754258499255  | 1.27694293383594  |
| C  | -1.15698154011235 | 1.46715873913367  | 0.10815216475674  |
| O  | 0.64060725895510  | 3.43207207988877  | 2.36497223852400  |
| O  | -2.29993876756426 | 1.69212865410754  | 0.30765300116425  |
| C  | 1.59465372734851  | 1.08109042811701  | 0.05990463704319  |
| N  | 2.86082291425296  | 0.96227267016705  | 0.37734287563163  |
| C  | 3.79847816025839  | 2.09776509040171  | 0.39474069700642  |
| H  | 4.57647449318994  | 1.95887002695391  | -0.37037083994017 |
| H  | 4.27879969299566  | 2.15597385247698  | 1.38124186500190  |
| H  | 3.24355840327105  | 3.01808731069641  | 0.20454442531130  |
| C  | 3.46083926756679  | -0.32680007892664 | 0.76484096902148  |
| H  | 4.05863369401497  | -0.73667530513303 | -0.06269824899397 |
| H  | 2.65819779357233  | -1.01905074896688 | 1.02642423599034  |
| H  | 4.11542235555235  | -0.17100019931200 | 1.63276690192361  |
| N  | 0.06609041646147  | 0.01911159572872  | 1.89127957748764  |
| C  | 0.01487305977886  | 0.07431319415998  | 3.05213365165495  |
| C  | -0.06944072718298 | 0.17510806299059  | 4.49374432923082  |
| H  | 0.71779584836382  | -0.42236225953144 | 4.97504000240047  |
| H  | -1.04877356871641 | -0.18151557057735 | 4.84416421115651  |
| H  | 0.04918621170023  | 1.22614337748287  | 4.79511555913137  |
| C  | 1.60898908711939  | 3.26054462232450  | -1.97949513469712 |
| H  | 2.65388916817051  | 3.03189526147418  | -2.16311182026101 |
| C  | 1.10739602727164  | 4.30482128463338  | -1.14969134621860 |
| H  | 1.69957251087107  | 5.02735777203755  | -0.59484616240901 |
| C  | -0.33428063900650 | 4.26228180495729  | -1.20051023026250 |
| H  | -1.01292487559475 | 4.92734731298465  | -0.67564347211340 |
| C  | -0.70232617695332 | 3.18268181340106  | -2.04422333449240 |
| H  | -1.71836873175743 | 2.87195621116955  | -2.26580894952105 |
| C  | 0.49534661536715  | 2.55870721034115  | -2.52200542845913 |
| H  | 0.55521022206476  | 1.71025910215180  | -3.19445432123488 |
| C  | 0.72623165518002  | -1.11352963896291 | -1.61462261773301 |
| H  | 1.61455498122019  | -0.90004602632852 | -2.20152250477274 |
| C  | -0.59151236448197 | -0.61631808526915 | -1.87121686044186 |
| H  | -0.88496940514949 | 0.03546430446208  | -2.68643747905584 |
| C  | -1.47896321465805 | -1.15801961358201 | -0.88553315006845 |
| H  | -2.53926728793996 | -0.94381591345798 | -0.79303737165191 |
| C  | -0.70670348127456 | -1.95594950282617 | -0.00971045682238 |
| H  | -1.07583547232384 | -2.45978134873044 | 0.87909665256374  |
| C  | 0.65928528932157  | -1.94491434680884 | -0.45568942660946 |
| H  | 1.47344751138868  | -2.50981257918856 | -0.01483561167960 |

## [2Z]<sup>+</sup>

|    |                   |                   |                   |
|----|-------------------|-------------------|-------------------|
| Fe | 0.70629924826351  | 2.34090196867153  | -0.44765616057002 |
| Fe | 0.01933963647869  | -0.00340101777971 | 0.08305390232723  |
| C  | 0.81859846753504  | 2.98540289101118  | 1.16530279112230  |
| C  | -1.02136350894149 | 1.57968379360419  | 0.00892152300918  |
| O  | 0.92688060297031  | 3.42612360862340  | 2.23565620615346  |
| O  | -2.13170087772849 | 1.96526559363175  | 0.13971074308984  |
| C  | 1.66042939558427  | 0.84581743832363  | 0.12500832451386  |
| N  | 2.88018362351933  | 0.58599636736365  | 0.52122258654119  |
| C  | 3.95088737797403  | 1.59795935728622  | 0.50053632488242  |
| H  | 4.60698978191993  | 1.44734105209046  | -0.36788199785143 |
| H  | 4.54831449955042  | 1.51487616187578  | 1.41550805832679  |
| H  | 3.49612596521604  | 2.59000936986791  | 0.45208739674981  |
| C  | 3.24565310255901  | -0.76040113053747 | 1.05698596920884  |
| H  | 2.32982769504989  | -1.34921840220824 | 0.93787830808965  |

|   |                   |                   |                   |
|---|-------------------|-------------------|-------------------|
| C | 4.36806692762013  | -1.41920127143883 | 0.25126261744765  |
| H | 5.29844902275743  | -0.83664735949233 | 0.35878118270796  |
| H | 4.11034992480644  | -1.42385689734164 | -0.81997443514875 |
| C | 4.60576781695902  | -2.84793883713698 | 0.76489931778590  |
| H | 3.71025468902796  | -3.46176348512128 | 0.56341242542223  |
| H | 5.43196485700368  | -3.31060078999445 | 0.20592045356882  |
| C | 4.90128916337069  | -2.85970073356374 | 2.27012392342983  |
| H | 5.01911422313996  | -3.89412712841916 | 2.62429400912232  |
| H | 5.86441702714837  | -2.35489362403992 | 2.45748430382432  |
| C | 3.79766617896263  | -2.15047041848248 | 3.06558044258930  |
| H | 4.04701253656873  | -2.12847597800118 | 4.13644760454278  |
| H | 2.85422708039032  | -2.71718924977735 | 2.97244810367385  |
| C | 3.57447416287494  | -0.71829561375077 | 2.55356199836971  |
| H | 4.48765208673161  | -0.12699094777575 | 2.73162792760028  |
| H | 2.75418064105000  | -0.22502208662468 | 3.09611496601447  |
| N | -0.06299048959328 | 0.11894353675838  | 1.94268753902428  |
| C | -0.13188762657961 | 0.23981872658608  | 3.09767620663500  |
| C | -0.22140732845251 | 0.42376686495561  | 4.53087732425079  |
| H | 0.35242205238900  | -0.35013914270685 | 5.06041200206179  |
| H | -1.26955576016610 | 0.37321197425308  | 4.85871387265904  |
| H | 0.18206958818124  | 1.41077678843036  | 4.80031556590508  |
| C | 1.05577902475268  | 2.27112266322033  | -2.57100247471292 |
| H | 1.21517884941558  | 1.37459971238657  | -3.15966359114756 |
| C | -0.20109485957067 | 2.90515300993071  | -2.30809566151499 |
| H | -1.17355316890307 | 2.55920222639490  | -2.64381776485364 |
| C | 0.03643118708630  | 4.05524164636755  | -1.50834487878533 |
| H | -0.71539449820148 | 4.73854765610925  | -1.12593077013308 |
| C | 1.45313825045680  | 4.12760931558074  | -1.26587392764297 |
| H | 1.95740451345220  | 4.89684908025134  | -0.68762671528814 |
| C | 2.07765104638429  | 3.03357579711306  | -1.93582898200036 |
| H | 3.14083753571742  | 2.81977124568341  | -1.96151798570689 |
| C | 0.68760337222475  | -1.57196736434307 | -1.17358785966217 |
| H | 1.71520916582979  | -1.70407960683270 | -1.49998983238165 |
| C | -0.31510542961575 | -0.81796309149078 | -1.85723333365246 |
| H | -0.19295681614563 | -0.29868701456139 | -2.80095488348688 |
| C | -1.53292688073744 | -0.90887978509327 | -1.10682871752588 |
| H | -2.47442396216777 | -0.42932139255356 | -1.35569728579067 |
| C | -1.27724021720271 | -1.68316746311929 | 0.04779119931845  |
| H | -1.98695664189152 | -1.90188736019404 | 0.83989307978366  |
| C | 0.10411391371068  | -2.09924326400696 | 0.01281040067330  |
| H | 0.59578383126434  | -2.71868738998322 | 0.75658865743038  |

[2E]<sup>+</sup>

|    |                   |                   |                   |
|----|-------------------|-------------------|-------------------|
| Fe | 0.73442712544901  | 2.30319519936636  | -0.51481542951658 |
| Fe | 0.01913895005467  | -0.03921134806939 | -0.01695443328923 |
| C  | 1.01203297745169  | 2.89055190503532  | 1.10004601964891  |
| C  | -0.97060291760558 | 1.57304935855659  | 0.07359860303187  |
| O  | 1.23028549602494  | 3.30016097679823  | 2.16615308960771  |
| O  | -2.04858260374514 | 1.99088097475910  | 0.32203387391135  |
| C  | 1.68336771171307  | 0.75540939310326  | -0.08792199839675 |
| N  | 2.92539841435926  | 0.44374314143275  | 0.17890184150947  |
| C  | 3.31628070622618  | -0.93090272583891 | 0.53656599618062  |
| H  | 3.96305619418408  | -0.91551293476733 | 1.42219286601980  |
| H  | 3.85869025021447  | -1.40480849346888 | -0.29284296368110 |
| H  | 2.40935469864007  | -1.49715567215145 | 0.75755399017409  |
| C  | 4.01723218010247  | 1.46587789310902  | 0.14532600394049  |
| H  | 3.49945372624930  | 2.39722628274011  | -0.11585192719115 |
| C  | 4.67004065470620  | 1.66681684952264  | 1.51680524808771  |
| H  | 5.19047877177962  | 0.74774356171809  | 1.83231318247355  |
| H  | 3.89707424715900  | 1.88724497239654  | 2.26781219350811  |
| C  | 5.69471918508178  | 2.80951970799134  | 1.43436546222709  |
| H  | 5.16697822611253  | 3.75524760003734  | 1.21995971269614  |

|   |                   |                   |                   |
|---|-------------------|-------------------|-------------------|
| H | 6.18014562801592  | 2.93951962179789  | 2.41232041221514  |
| C | 6.74011969361610  | 2.54625890282354  | 0.34393718330454  |
| H | 7.44108115706726  | 3.39114659998488  | 0.27735034391576  |
| H | 7.34021880164224  | 1.66150532218640  | 0.62111365568754  |
| C | 6.07888094930641  | 2.29972937857523  | -1.01774675958951 |
| H | 6.83438573874810  | 2.06728195820593  | -1.78140497746137 |
| H | 5.57256413293044  | 3.22445595939785  | -1.34854392976698 |
| C | 5.05169833416178  | 1.15958614671736  | -0.94006898555142 |
| H | 5.57553401730229  | 0.21702555216188  | -0.70904272110417 |
| H | 4.54630317667124  | 1.01625502465924  | -1.90908999451805 |
| N | 0.11934921445337  | 0.00478695639175  | 1.84573555001980  |
| C | 0.17467794983513  | 0.08831599958081  | 3.00481030927166  |
| C | 0.22425623218017  | 0.22528516179068  | 4.44529135261245  |
| H | 0.85403530141842  | -0.55785182777765 | 4.89108658760635  |
| H | -0.78692612682854 | 0.15111699433355  | 4.87070161684853  |
| H | 0.64200581059569  | 1.20842282245727  | 4.70713279354437  |
| C | 0.86528778708179  | 2.31162775358257  | -2.66638291838320 |
| H | 0.93406031706023  | 1.43663749514588  | -3.30310477246240 |
| C | -0.33527569426107 | 2.97340334429028  | -2.25194952332366 |
| H | -1.34865736186195 | 2.67119139205888  | -2.49610477076908 |
| C | 0.02291074704830  | 4.08036478431576  | -1.43677379725450 |
| H | -0.66168154449399 | 4.76958522858487  | -0.95260691169058 |
| C | 1.45918248834943  | 4.09741800291153  | -1.33882932996883 |
| H | 2.04791262211480  | 4.82361576804003  | -0.78537923122279 |
| C | 1.97219828342417  | 3.01454416704495  | -2.11248117816065 |
| H | 3.01893131615654  | 2.76988603786464  | -2.25958739824501 |
| C | 0.50763347179998  | -1.52661732509676 | -1.44244298532495 |
| H | 1.48251395197055  | -1.64006413315224 | -1.90661287348744 |
| C | -0.56820610514400 | -0.72882423561803 | -1.94189131291655 |
| H | -0.56146662395452 | -0.14883741289118 | -2.85788404633055 |
| C | -1.68233068052269 | -0.86794231407119 | -1.05093556482706 |
| H | -2.64257682172538 | -0.37088420879907 | -1.14558595508775 |
| C | -1.28672875320904 | -1.71402946253483 | 0.00998415079852  |
| H | -1.89072802637723 | -1.98020209124407 | 0.87210644710524  |
| C | 0.07530499096248  | -2.12825332449740 | -0.22587626151146 |
| H | 0.64656163030768  | -2.80353668149205 | 0.40351446508599  |

### [3E]<sup>+</sup>

|    |                   |                   |                   |
|----|-------------------|-------------------|-------------------|
| Fe | 0.76093733092635  | 2.40345925501804  | -0.44407162066850 |
| Fe | -0.14447359791189 | 0.10206074689531  | -0.09412128059693 |
| C  | 0.91728553612272  | 2.96543524873639  | 1.19447989614140  |
| C  | -1.03658606890246 | 1.76856374053067  | -0.02153193796871 |
| O  | 1.06289314394024  | 3.37816795904895  | 2.27204533134150  |
| O  | -2.10120928863259 | 2.25663511513765  | 0.14065870795815  |
| C  | 1.56214876603137  | 0.78924714872422  | 0.01905112020697  |
| N  | 2.74236292593764  | 0.38364278197355  | 0.40912231649850  |
| C  | 2.99937346331629  | -1.03052240371260 | 0.73570000044789  |
| H  | 3.71424134417632  | -1.09157526553347 | 1.56420840899851  |
| H  | 3.41719422643149  | -1.55805003648961 | -0.13252529956909 |
| H  | 2.05600220055746  | -1.49423623349925 | 1.03235014337097  |
| C  | 3.88143256940039  | 1.33351347205235  | 0.59581868060203  |
| H  | 3.48874021269008  | 2.29305991768365  | 0.23792752600601  |
| C  | 4.23669061513588  | 1.50093536702032  | 2.07791836361115  |
| H  | 4.58973024118573  | 0.54465136226953  | 2.49760455385246  |
| H  | 3.33775054081853  | 1.79746919253671  | 2.63900527719974  |
| C  | 5.34520368307107  | 2.55393907689773  | 2.22920038838210  |
| H  | 4.95558831674426  | 3.53712897655673  | 1.91253435943824  |
| H  | 5.61568603030964  | 2.65499895535549  | 3.29014006677649  |
| C  | 6.57524459079900  | 2.19580624679037  | 1.38766391225629  |
| H  | 7.34075973723967  | 2.98002886083243  | 1.48136600782014  |
| H  | 7.02755257554382  | 1.26848604092821  | 1.77981729273186  |
| C  | 6.20663835992227  | 1.99360178350457  | -0.08758671503274 |

|   |                   |                   |                   |
|---|-------------------|-------------------|-------------------|
| H | 7.08876286557315  | 1.68969056442300  | -0.66931650608688 |
| H | 5.86662033019608  | 2.95329245586778  | -0.51587537069782 |
| C | 5.09622840494499  | 0.94398527297010  | -0.24709295118305 |
| H | 5.47723338006271  | -0.03758943531879 | 0.08041690249604  |
| H | 4.80230995422075  | 0.83689688588814  | -1.30382222445905 |
| C | 1.08983834853028  | 2.42579620660505  | -2.57207097879124 |
| H | 1.14164699841125  | 1.55305532644372  | -3.21403963753337 |
| C | -0.08395808932905 | 3.18326145284742  | -2.25531851637473 |
| H | -1.09298486857509 | 2.97185492102463  | -2.59520485529833 |
| C | 0.28951726421445  | 4.24548335753060  | -1.39022041222581 |
| H | -0.37549175253576 | 4.98666164496151  | -0.95836340283354 |
| C | 1.70722348371058  | 4.13778828220342  | -1.16041055682121 |
| H | 2.30089047105394  | 4.80424306054760  | -0.54122991610577 |
| C | 2.19673298035369  | 3.02379911345948  | -1.90415775983746 |
| H | 3.22700484800413  | 2.68633946297164  | -1.94996131942425 |
| C | 0.34177754097780  | -1.27903267914170 | -1.61354935107669 |
| H | 1.32192948656800  | -1.37178362835662 | -2.07088325066440 |
| C | -0.71724556075943 | -0.43265258526466 | -2.06774191710983 |
| H | -0.69096328747386 | 0.21841155484539  | -2.93477141219320 |
| C | -1.84673912055992 | -0.62349404007945 | -1.20594331603067 |
| H | -2.79768939304397 | -0.10484017384305 | -1.27507210917178 |
| C | -1.47617257730574 | -1.55169892305432 | -0.20692072255264 |
| H | -2.09448796608696 | -1.86914366704606 | 0.62741754558689  |
| C | -0.11825332089600 | -1.96805394528451 | -0.45312690408898 |
| H | 0.43431331684696  | -2.70011762600938 | 0.12664497351251  |
| N | -0.15238862131100 | 0.04465939648309  | 1.77184920185620  |
| C | -0.09823309857519 | 0.02253453482683  | 2.93461907394751  |
| C | -0.01118187044461 | -0.02348571964189 | 4.39774609074431  |
| C | -1.21505362188088 | -0.83146503262891 | 4.93560062375471  |
| H | -2.16621229617383 | -0.35705062160158 | 4.66009725327240  |
| H | -1.15290690646010 | -0.87287406094365 | 6.03199075359857  |
| H | -1.20870631279095 | -1.86004101597406 | 4.55096401753925  |
| C | -0.04367319808869 | 1.42472480544843  | 4.93749687430590  |
| H | 0.79515646911706  | 2.01662903872226  | 4.54942942822753  |
| H | 0.02741654310746  | 1.39180643165707  | 6.03382400504483  |
| H | -0.97995956005862 | 1.92987523026755  | 4.66532203036871  |
| C | 1.32004337514916  | -0.71321484533199 | 4.77995458247785  |
| H | 1.36570209523511  | -1.73809735071647 | 4.38780850132652  |
| H | 1.39641244153501  | -0.75949754337732 | 5.87505922060264  |
| H | 2.18100336968431  | -0.14756341563650 | 4.39865681213162  |

[4E]<sup>+</sup>

|    |                   |                   |                   |
|----|-------------------|-------------------|-------------------|
| Fe | 0.69968232139506  | 2.30086123302583  | -0.52124083522523 |
| Fe | -0.02772854545227 | -0.03956244565040 | -0.03286295388101 |
| C  | 0.95889190291182  | 2.90422176722804  | 1.08942549330723  |
| C  | -1.01200503930586 | 1.57698077677656  | 0.06022515119402  |
| O  | 1.16307736276089  | 3.33752645773665  | 2.14944609935943  |
| O  | -2.09017048007220 | 1.99902490087570  | 0.29713637668675  |
| C  | 1.63869859221114  | 0.75269911223940  | -0.07917522688743 |
| N  | 2.87211074626380  | 0.43851858642498  | 0.21874818493911  |
| C  | 3.25054775275953  | -0.93653173628200 | 0.58830121841959  |
| H  | 3.85356852928843  | -0.92304020087913 | 1.50408455766629  |
| H  | 3.83125537822834  | -1.40486234237649 | -0.21775145547094 |
| H  | 2.33616577547806  | -1.50544945487761 | 0.76676446208674  |
| C  | 3.96357274582676  | 1.46115618913999  | 0.22371005384510  |
| H  | 3.45282682577702  | 2.39399374537462  | -0.04628036673427 |
| C  | 4.57604587765885  | 1.64890891346156  | 1.61519134903731  |
| H  | 5.09091105437136  | 0.72785576274349  | 1.93399827462526  |
| H  | 3.78204531221360  | 1.85566146219243  | 2.34792140961843  |
| C  | 5.59896667790213  | 2.79499174132821  | 1.57386654001828  |
| H  | 5.07505540918937  | 3.74224196072824  | 1.35632981365552  |
| H  | 6.05680222299040  | 2.91515367875209  | 2.56636617405679  |

|   |                   |                   |                   |
|---|-------------------|-------------------|-------------------|
| C | 6.67547705082554  | 2.54543185739099  | 0.51095560732129  |
| H | 7.37441245322602  | 3.39388006792788  | 0.47145634342229  |
| H | 7.27193147056354  | 1.66135886574654  | 0.79798209016805  |
| C | 6.05524714187425  | 2.30820185118389  | -0.87174285838743 |
| H | 6.83377429465511  | 2.08485955756662  | -1.61476892300097 |
| H | 5.55657373077400  | 3.23483308961109  | -1.20919905418957 |
| C | 5.02858358444048  | 1.16545047602211  | -0.83423100048873 |
| H | 5.54719522129198  | 0.22127608141984  | -0.59802058921702 |
| H | 4.55079357964704  | 1.03038671588968  | -1.81832671844387 |
| N | 0.08920712318644  | -0.02864860323196 | 1.81992196927700  |
| C | 0.19845832451676  | 0.00311939975328  | 2.98252765987043  |
| C | 0.89293640182318  | 2.29443958372622  | -2.66656520064103 |
| H | 1.00018087545444  | 1.41411036464673  | -3.29079244870925 |
| C | -0.33443645881267 | 2.93150239514602  | -2.29368239658196 |
| H | -1.33299043634556 | 2.60353506058731  | -2.56413099980441 |
| C | -0.02670816346221 | 4.05442363784250  | -1.47936829416226 |
| H | -0.74148279028020 | 4.73003781613584  | -1.02031754134410 |
| C | 1.40425041377762  | 4.10606562269613  | -1.33938927267100 |
| H | 1.95917828528404  | 4.85050567924973  | -0.77525391796785 |
| C | 1.96633311499545  | 3.02808640929477  | -2.08642650561456 |
| H | 3.02272823953071  | 2.80734707696063  | -2.19916529290469 |
| C | 0.46550371915036  | -1.52316585959804 | -1.46397662425182 |
| H | 1.44453730828877  | -1.64000072037009 | -1.91859262678139 |
| C | -0.60154316964480 | -0.71794125929043 | -1.96930087516992 |
| H | -0.58351070488040 | -0.13454928251410 | -2.88305543925515 |
| C | -1.72384692874382 | -0.85438785026011 | -1.08805542299991 |
| H | -2.68047451269247 | -0.35150185954596 | -1.18864534414075 |
| C | -1.34263903420410 | -1.70761298469728 | -0.02743356566887 |
| H | -1.95459810187447 | -1.97155734765369 | 0.82970946619837  |
| C | 0.01890701478784  | -2.12749548810855 | -0.25413152707833 |
| H | 0.58297432256938  | -2.80572040422252 | 0.37863745679578  |
| C | 0.34240323355725  | 0.05973976402948  | 4.39059873629796  |
| C | 0.63312898950514  | 0.18775781967741  | 7.16284675062525  |
| C | 0.21432415686841  | -1.11372937562999 | 5.16477334786929  |
| C | 0.61542823366445  | 1.29881401133053  | 5.01064818836263  |
| C | 0.75953031476830  | 1.35054229542140  | 6.39443305178545  |
| C | 0.36047716900535  | -1.03941118307686 | 6.54716210776481  |
| H | -0.00170872803067 | -2.06491776558110 | 4.67845013665928  |
| H | 0.70866779481807  | 2.19841568863142  | 4.40334723047698  |
| H | 0.96870080412191  | 2.30539108311544  | 6.87752082315300  |
| H | 0.25933278894406  | -1.94310483750393 | 7.14877172718971  |
| H | 0.74544145065910  | 0.23788244231889  | 8.24662542592023  |

[5E]<sup>+</sup>

|    |                   |                   |                   |
|----|-------------------|-------------------|-------------------|
| Fe | 1.81254841788588  | 1.60304166034020  | -0.36513404613825 |
| Fe | 0.05352576851955  | -0.12747602256602 | 0.02352386036907  |
| C  | 2.19651613517791  | 2.05026637590216  | 1.26984946901727  |
| C  | -0.08306686404578 | 1.75417721996550  | 0.09518104079161  |
| O  | 2.49634112803925  | 2.37951002402649  | 2.34491817072381  |
| O  | -0.85107692472655 | 2.63621640814382  | 0.27020292076296  |
| C  | 1.89125250661952  | -0.20097121836605 | 0.08964050710186  |
| N  | 2.81352096434754  | -1.05104514320614 | 0.45914201423395  |
| C  | 2.47602541790253  | -2.43659900274740 | 0.83444558133399  |
| H  | 3.12493494227080  | -2.76543875120744 | 1.65444462499922  |
| H  | 2.61084667802961  | -3.11182115822290 | -0.02148047080624 |
| H  | 1.43596047214806  | -2.45785691622825 | 1.16610527130892  |
| C  | 4.24610215489254  | -0.64833312031467 | 0.58993193856916  |
| H  | 4.27945811716821  | 0.36647280755514  | 0.17488117203999  |
| C  | 4.67495479703095  | -0.57114335759248 | 2.05999012716443  |
| H  | 4.61785386805866  | -1.57050323096519 | 2.52380801269405  |
| H  | 3.98825301010908  | 0.08513734814288  | 2.61311119676492  |
| C  | 6.12136120502532  | -0.06436576498533 | 2.15519788705325  |



|   |                   |                   |                   |
|---|-------------------|-------------------|-------------------|
| H | 6.16673611364016  | 0.97432359989101  | 1.78442404194796  |
| H | 6.43365740928189  | -0.03270023036212 | 3.20925459925752  |
| C | 7.07475859475330  | -0.94321174100997 | 1.33585453154468  |
| H | 8.09864789994577  | -0.54511963651228 | 1.38666654533907  |
| H | 7.10719297333194  | -1.95396441625600 | 1.77854224710527  |
| C | 6.62071734378339  | -1.04644500054856 | -0.12578003448979 |
| H | 7.28617511620948  | -1.71213631649834 | -0.69409320342746 |
| H | 6.69220488723932  | -0.05227114532489 | -0.60223686240083 |
| C | 5.17284598425491  | -1.55050281087090 | -0.22840197322716 |
| H | 4.84041323236465  | -1.57940033954061 | -1.27854743333143 |
| H | 5.12035793619011  | -2.58321154085700 | 0.15414652547425  |
| N | 0.08257889737028  | -0.17819253576564 | 1.89154631057816  |
| C | 0.19852424446782  | -0.22779348219048 | 3.05483315936847  |
| C | 0.33921659140388  | -0.28104383500564 | 4.45323637295101  |
| C | 0.95692289495689  | 0.78322482439905  | 5.15305342458624  |
| H | 1.31925162597472  | 1.65058004412959  | 4.60153667459280  |
| C | 1.10259018786887  | 0.73274511866434  | 6.52585375739524  |
| H | 1.57604156320364  | 1.57243806912188  | 7.03009387689670  |
| C | 0.63728581811878  | -0.38492191085424 | 7.27740048768160  |
| C | 0.01098337334781  | -1.44626833514805 | 6.56205893608025  |
| H | -0.37280780888094 | -2.31399047181413 | 7.09384563304866  |
| C | -0.13106827422198 | -1.39481216174588 | 5.18894587737557  |
| H | -0.61702016455080 | -2.22029231272705 | 4.66724531465782  |
| N | 0.78612319492582  | -0.43771256249140 | 8.63373822767462  |
| C | 1.37671392822517  | 0.68673683715560  | 9.35282050859648  |
| H | 2.39865426264411  | 0.89400782256883  | 8.99919933957389  |
| H | 1.43142322086372  | 0.43797106494166  | 10.41697953020404 |
| H | 0.77319889406675  | 1.60328925122393  | 9.24343116013929  |
| C | 0.25797338129050  | -1.56772007354864 | 9.39100295843441  |
| H | -0.84097558752583 | -1.62973605102181 | 9.32160976238656  |
| H | 0.52939894432806  | -1.44617669495599 | 10.44412997785632 |
| H | 0.68634636125982  | -2.51854005078599 | 9.03898247430402  |
| C | 2.25934420234818  | 3.47875312425692  | -1.23851769710685 |
| H | 2.08182486970705  | 4.42905190779521  | -0.74531357292017 |
| C | 3.45031843015975  | 2.67127225100350  | -1.12586921388946 |
| H | 4.33494659167653  | 2.92191036235616  | -0.54698482260010 |
| C | 3.27131064137969  | 1.50645367071576  | -1.92717375388265 |
| H | 3.98716142493815  | 0.70146814436801  | -2.05912170421379 |
| C | 1.97440960195026  | 1.57392267443152  | -2.51409218938920 |
| H | 1.54344037382669  | 0.82861437643719  | -3.17314546852368 |
| C | 1.35444111243197  | 2.79360356379099  | -2.09015822495181 |
| H | 0.35537073940278  | 3.12811828211447  | -2.35067612286901 |
| C | -0.11392721720923 | -1.55762492212480 | -1.51313500639344 |
| H | 0.73298883042950  | -2.00923795851027 | -2.02004275504681 |
| C | -0.78726208968599 | -0.36007791160707 | -1.91124886559063 |
| H | -0.55696265699147 | 0.24807588664476  | -2.77872789308595 |
| C | -1.85941459693903 | -0.11847178389655 | -0.99056778775572 |
| H | -2.53711556023540 | 0.72949932369266  | -1.00766048074749 |
| C | -1.82432420669193 | -1.13614441155622 | -0.01143080233532 |
| H | -2.46922559327929 | -1.20212299487426 | 0.85994618501104  |
| C | -0.74664069961228 | -2.03870763351325 | -0.32856282148279 |
| H | -0.49205903219130 | -2.93777708545936 | 0.22235097161540  |

[6E]<sup>+</sup>

|    |                   |                   |                   |
|----|-------------------|-------------------|-------------------|
| Fe | 0.69063353379871  | 2.29112488056292  | -0.49767767268333 |
| Fe | -0.02814937820676 | -0.05798137023422 | -0.02673190952765 |
| C  | 0.94861262939956  | 2.87905764024973  | 1.11905317202565  |
| C  | -1.01759258771418 | 1.56217819033543  | 0.07181946219897  |
| O  | 1.15118812346040  | 3.29941354759002  | 2.18443034900330  |
| O  | -2.09859597891503 | 1.97267787871402  | 0.31318408312075  |
| C  | 1.63848705753008  | 0.74359652757127  | -0.07379967717938 |
| N  | 2.87287586490554  | 0.42930105529239  | 0.21586312870259  |

|   |                   |                   |                   |
|---|-------------------|-------------------|-------------------|
| C | 3.25866879505453  | -0.95019263059435 | 0.56141840937221  |
| H | 3.87505064783529  | -0.94695209854121 | 1.46834568939554  |
| H | 3.82977019688261  | -1.40566888599466 | -0.25866649142902 |
| H | 2.34838639016182  | -1.52433169096807 | 0.74457045977199  |
| C | 3.96209782899087  | 1.45621335458504  | 0.23676245115557  |
| H | 3.44930574438518  | 2.39023256698283  | -0.02473582446810 |
| C | 4.56605401418938  | 1.62994526660985  | 1.63376872586173  |
| H | 5.08152992779473  | 0.70711223556166  | 1.94616531946864  |
| H | 3.76694779605954  | 1.82690207839470  | 2.36388247530531  |
| C | 5.58520396506460  | 2.77989159308295  | 1.61115402627897  |
| H | 5.05908081654718  | 3.72792275209277  | 1.40235749817274  |
| H | 6.03727480547749  | 2.88951446171310  | 2.60739361939072  |
| C | 6.66780312188149  | 2.54619951901051  | 0.55098053335548  |
| H | 7.36377023065205  | 3.39748478412026  | 0.52490565161009  |
| H | 7.26610470436607  | 1.66120068797585  | 0.83097171755437  |
| C | 6.05574884476642  | 2.32281014905727  | -0.83761894629459 |
| H | 6.83896393881625  | 2.10986896434131  | -1.57867713324890 |
| H | 5.55634285513103  | 3.25164167707173  | -1.16803649737094 |
| C | 5.03298034640896  | 1.17594230022793  | -0.81901549856442 |
| H | 5.55453730630735  | 0.23130308157614  | -0.59167484612155 |
| H | 4.56077009430597  | 1.05091478582097  | -1.80724835304695 |
| N | 0.08226042316160  | -0.05555621685694 | 1.81586178047624  |
| C | 0.17860249428691  | -0.02336393351128 | 2.98047824956364  |
| C | 0.88522310855302  | 2.31084142451992  | -2.64306701028006 |
| H | 0.99344346508947  | 1.43921745865960  | -3.27919280788929 |
| C | -0.34273702720697 | 2.94265458894262  | -2.26321064565477 |
| H | -1.34092966575262 | 2.61846682229297  | -2.53961293406102 |
| C | -0.03583755399814 | 4.05570385257044  | -1.43494861916815 |
| H | -0.75105167359993 | 4.72640530041093  | -0.96934687218335 |
| C | 1.39511205088560  | 4.10672686927859  | -1.29408048864912 |
| H | 1.94952418264031  | 4.84506743110309  | -0.72145520925051 |
| C | 1.95781305260350  | 3.03790099891962  | -2.05360305278811 |
| H | 3.01434512738649  | 2.81929082655990  | -2.16893759297954 |
| C | 0.47445192180754  | -1.52900431698962 | -1.47027257466306 |
| H | 1.45516502057655  | -1.64199093781095 | -1.92216331411126 |
| C | -0.59033511814986 | -0.71936104945600 | -1.97301835089293 |
| H | -0.56794935565943 | -0.12774332503368 | -2.88131413803179 |
| C | -1.71656814585054 | -0.86373587213047 | -1.09825865880264 |
| H | -2.67364500935640 | -0.36182611340987 | -1.19959261610394 |
| C | -1.34030760212366 | -1.72805315139457 | -0.04427104004811 |
| H | -1.95776272041980 | -2.00321452838928 | 0.80543530537406  |
| C | 0.02214688708915  | -2.14524487170036 | -0.26864815245493 |
| H | 0.58389904160818  | -2.82920810873141 | 0.36012831477095  |
| C | 0.31065266542003  | 0.03940541681251  | 4.38872178914680  |
| C | 0.58560491836629  | 0.17954596486862  | 7.13275684460152  |
| C | 0.15884258794702  | -1.12831757387005 | 5.16944047969128  |
| C | 0.59812989554432  | 1.28003093043175  | 5.00186083412002  |
| C | 0.73618965395313  | 1.34615274878369  | 6.38333869028729  |
| C | 0.29735284182734  | -1.05471897580624 | 6.55047786791535  |
| H | -0.06837951642478 | -2.07992167462414 | 4.69013208780099  |
| H | 0.70835149969314  | 2.17498037174665  | 4.39120093714307  |
| H | 0.95680313749970  | 2.28444516420909  | 6.89011645351588  |
| H | 0.18668842984620  | -1.93356488786708 | 7.18402843707777  |
| N | 0.74320577266605  | 0.25343781390548  | 8.61775049984445  |
| O | 1.00939869010781  | 1.35755839974298  | 9.10052223093332  |
| O | 0.59844488464548  | -0.79533014838476 | 9.25159935394006  |

[7E]\*

|    |                   |                   |                   |
|----|-------------------|-------------------|-------------------|
| Fe | 0.70521495946439  | 2.29883431356965  | -0.49714872036007 |
| Fe | -0.01438517127656 | -0.04777443041627 | -0.02876918685662 |
| C  | 0.96897484452401  | 2.89089722939474  | 1.11615650615013  |
| C  | -1.00180094359557 | 1.56677045806606  | 0.08035768356836  |

|   |                   |                   |                   |
|---|-------------------|-------------------|-------------------|
| O | 1.17254598206182  | 3.31682888800229  | 2.17962638380177  |
| O | -2.08049684602821 | 1.98298343157809  | 0.32550666232623  |
| C | 1.64924034939927  | 0.74869566392570  | -0.07056076408443 |
| N | 2.88343676763333  | 0.43447201725951  | 0.22342232683653  |
| C | 3.26607203258919  | -0.94654744050632 | 0.56590491376737  |
| H | 3.90529499991233  | -0.94412372174020 | 1.45674556318171  |
| H | 3.81199664664703  | -1.41143106559898 | -0.26604232284534 |
| H | 2.35406048757753  | -1.50921338098468 | 0.77391312372982  |
| C | 3.97650849331900  | 1.45630264438907  | 0.22111491513283  |
| H | 3.46170805494570  | 2.39156712724120  | -0.03215612323475 |
| C | 4.60949973831698  | 1.63150104104095  | 1.60495725176096  |
| H | 5.12500526467490  | 0.70663025277473  | 1.91165378567032  |
| H | 3.82678365182193  | 1.83719855960253  | 2.35004231303892  |
| C | 5.63694249680553  | 2.77344468148177  | 1.55618522065164  |
| H | 5.11484053373804  | 3.72345605138877  | 1.34604072448976  |
| H | 6.10555968354971  | 2.89019721223904  | 2.54406218806244  |
| C | 6.69891920663569  | 2.52212806805759  | 0.47950133766136  |
| H | 7.40768628977640  | 3.36235589640549  | 0.43904963881554  |
| H | 7.28868871972766  | 1.62897339260207  | 0.75208733234720  |
| C | 6.05812372514140  | 2.30335288870832  | -0.89661445519103 |
| H | 6.82352471984813  | 2.08383012716382  | -1.65423085458393 |
| H | 5.56003799834797  | 3.23656942133537  | -1.21665894071988 |
| C | 5.02451211072211  | 1.16733223220482  | -0.85607941340547 |
| H | 5.53877557783933  | 0.21620805370576  | -0.63950117685328 |
| H | 4.53080420903676  | 1.04734644717855  | -1.83456414404486 |
| N | 0.09573366111258  | -0.04538040380877 | 1.82401807152643  |
| C | 0.19507874479333  | -0.00775554872828 | 2.98758700604062  |
| C | 0.89606507953497  | 2.30892254216983  | -2.64464417508859 |
| H | 1.00810747893616  | 1.43260929230775  | -3.27373478000307 |
| C | -0.33347988245982 | 2.93780939936947  | -2.26570547673118 |
| H | -1.33100495217213 | 2.60687069912831  | -2.53656438341385 |
| C | -0.03042012638205 | 4.05653874039375  | -1.44410549896204 |
| H | -0.74776813142215 | 4.72609850580224  | -0.98019175894333 |
| C | 1.40000495204348  | 4.11343307943809  | -1.30492460918862 |
| H | 1.95160863706132  | 4.85617925420122  | -0.73521019576194 |
| C | 1.96650211991384  | 3.04318114068476  | -2.05987891962479 |
| H | 3.02391374740431  | 2.82818193667047  | -2.17391334465108 |
| C | 0.46636389186488  | -1.51505560600817 | -1.48212354620109 |
| H | 1.44211045299604  | -1.62258462506194 | -1.94604845255233 |
| C | -0.60611570876040 | -0.70479152126755 | -1.96776218363559 |
| H | -0.59809962888058 | -0.11002949163091 | -2.87437327464842 |
| C | -1.72052312108676 | -0.85467092005715 | -1.07860147762452 |
| H | -2.67861870911904 | -0.35160806117175 | -1.16352839972633 |
| C | -1.32816192997721 | -1.71918440676871 | -0.03170072908208 |
| H | -1.93156943825223 | -1.99437939441757 | 0.82801119078989  |
| C | 0.03224138036903  | -2.13346018422146 | -0.27484572413803 |
| H | 0.60169056548370  | -2.82108421704078 | 0.34282677695432  |
| C | 0.32083391939816  | 0.06327857014678  | 4.39502517986486  |
| C | 0.56760718683544  | 0.22228432248225  | 7.14519594246397  |
| C | 0.26169590767467  | -1.11146873470898 | 5.17728744869919  |
| C | 0.50455253400924  | 1.32024066179588  | 5.01428235161731  |
| C | 0.63028508138933  | 1.39830842230843  | 6.39617547445818  |
| C | 0.38469476692887  | -1.03140964916543 | 6.55932521045556  |
| H | 0.11495875570154  | -2.07876467634265 | 4.69748161356945  |
| H | 0.54843310618861  | 2.22278638568779  | 4.40617942438917  |
| H | 0.77122975543020  | 2.35379914407612  | 6.90040914016415  |
| H | 0.33965503669612  | -1.92048836038117 | 7.18721401163663  |
| F | 0.68832028359061  | 0.29880764404861  | 8.48483631853390  |

[M2]<sup>+</sup>

|    |                  |                  |                   |
|----|------------------|------------------|-------------------|
| Fe | 0.71831901659827 | 2.35673212675592 | -0.47320441432354 |
| Fe | 0.01197382343487 | 0.02714940330775 | 0.10730998121627  |

|   |                   |                   |                   |
|---|-------------------|-------------------|-------------------|
| C | 0.84712390674251  | 3.04459747859589  | 1.12661531413425  |
| C | -1.01086382720677 | 1.64400562823374  | -0.00656449125109 |
| O | 0.96735611381311  | 3.51657732076218  | 2.17867337285207  |
| O | -2.12142180032116 | 2.02437482806838  | 0.11884669069141  |
| C | 1.66949346415548  | 0.87255512256203  | 0.12450999742317  |
| N | 2.88247540789737  | 0.60223041399973  | 0.52380721159657  |
| C | 3.96474019246055  | 1.60391619825207  | 0.49821286485431  |
| H | 4.62027763866460  | 1.43606032401958  | -0.36681546223754 |
| H | 4.55651174699403  | 1.51905160275959  | 1.41614940368852  |
| H | 3.52238702521227  | 2.60078608536142  | 0.44123212788052  |
| C | 3.23965843045821  | -0.74787516320761 | 1.06410396195944  |
| H | 2.31585933254740  | -1.32667735738193 | 0.95951523071987  |
| C | 4.34249029813423  | -1.42185755345521 | 0.24433413650656  |
| H | 5.28136287740962  | -0.85144078571029 | 0.33879011214861  |
| H | 4.07130980700667  | -1.42641943130375 | -0.82362753201718 |
| C | 4.56736359260899  | -2.85264304122719 | 0.75953778991015  |
| H | 3.66243595043004  | -3.45567171590552 | 0.56840469333738  |
| H | 5.38150470578214  | -3.32586439070457 | 0.19212059190637  |
| C | 4.87895049765572  | -2.86554758500746 | 2.26157709011373  |
| H | 4.98307063257127  | -3.90115585469443 | 2.61583838402225  |
| H | 5.85238274444573  | -2.37688296985624 | 2.43703578474002  |
| C | 3.79688799771815  | -2.13666341877978 | 3.06830009124699  |
| H | 4.05897815377253  | -2.11231682440355 | 4.13539671251613  |
| H | 2.84309935641619  | -2.68800948701479 | 2.99221318580605  |
| C | 3.59055047953329  | -0.70210947060236 | 2.55499419830697  |
| H | 4.51825948497640  | -0.12908561610915 | 2.71517756401334  |
| H | 2.79186544908463  | -0.19427752879393 | 3.11387103566218  |
| C | 1.09173097893103  | 2.24992874471342  | -2.59046219650469 |
| H | 1.25913325890077  | 1.34476664483629  | -3.16359482096824 |
| C | -0.16846268289039 | 2.88720071136356  | -2.35229613389827 |
| H | -1.13704320098817 | 2.53654574624676  | -2.69439446593720 |
| C | 0.05967628187778  | 4.05236420195492  | -1.57058892900973 |
| H | -0.69670570582376 | 4.74209700677140  | -1.20901056463966 |
| C | 1.47302616074896  | 4.13113144054441  | -1.31559006580340 |
| H | 1.97071120858916  | 4.91082326359793  | -0.74566923616592 |
| C | 2.10553049146806  | 3.02551820968200  | -1.95874809717595 |
| H | 3.16908633800612  | 2.81273907844200  | -1.96899005301120 |
| C | 0.66946763313320  | -1.55974149611687 | -1.14128665449509 |
| H | 1.69705348351992  | -1.70783396193177 | -1.46028635357505 |
| C | -0.31995356471427 | -0.79708446568100 | -1.83393558406940 |
| H | -0.18593109397073 | -0.28583340548186 | -2.78021298202144 |
| C | -1.54312201767115 | -0.86630680466070 | -1.09020362701284 |
| H | -2.47765114707177 | -0.37798956195467 | -1.34792348260261 |
| C | -1.30421578285057 | -1.63916710833276 | 0.06933354217933  |
| H | -2.02160620767000 | -1.84711809022620 | 0.85777061620932  |
| C | 0.07220026739103  | -2.07245753583980 | 0.04410494958823  |
| H | 0.55326620477137  | -2.69138475753685 | 0.79543226389665  |
| N | -0.07037908017963 | 0.15190723820454  | 1.91837767567294  |
| C | -0.14339563075115 | 0.21705573468428  | 3.08197156434327  |
| C | -0.22861895860709 | 0.28750429130468  | 4.55293933366151  |
| F | 1.00208686627844  | 0.12538624884658  | 5.10209982027736  |
| F | -1.03569636805598 | -0.69057469041773 | 5.01797679976967  |
| F | -0.71511023136770 | 1.48233497846689  | 4.94092105386861  |

[M3]<sup>+</sup>

|    |                   |                  |                   |
|----|-------------------|------------------|-------------------|
| Fe | 0.71501455630562  | 2.35754013127738 | -0.47189915232317 |
| Fe | 0.00826804396147  | 0.02594798605598 | 0.09725112356612  |
| C  | 0.82016118177131  | 3.03303990824193 | 1.13171621894706  |
| C  | -1.01889836442256 | 1.62899019572174 | -0.01697573056513 |
| O  | 0.91612701875759  | 3.49243847565542 | 2.19360920732893  |
| O  | -2.12874435229311 | 2.01566204851187 | 0.10300212745750  |
| C  | 1.66427325837281  | 0.87199195375565 | 0.12556605346237  |

|   |                   |                   |                   |
|---|-------------------|-------------------|-------------------|
| N | 2.87545732865479  | 0.60347008079042  | 0.53194988587678  |
| C | 3.95489111249879  | 1.60795850884115  | 0.51484841593954  |
| H | 4.61823534732831  | 1.44236507718628  | -0.34492501475954 |
| H | 4.53957157352406  | 1.52454326055738  | 1.43758097928711  |
| H | 3.50976875743374  | 2.60359745903800  | 0.45404954862201  |
| C | 3.23282907632299  | -0.74700865940418 | 1.07129955293442  |
| H | 2.30831595024220  | -1.32479827532143 | 0.96751617665322  |
| C | 4.33360026228906  | -1.42056747560410 | 0.24825505381389  |
| H | 5.27336585519515  | -0.85112536438274 | 0.34233330723281  |
| H | 4.06063588876410  | -1.42289501617843 | -0.81942465476596 |
| C | 4.55837865067344  | -2.85250388225313 | 0.76011144327608  |
| H | 3.65207923641781  | -3.45419478398558 | 0.57018093002569  |
| H | 5.37064903958201  | -3.32574085166934 | 0.18973857966233  |
| C | 4.87287626099394  | -2.86833990292736 | 2.26157340257224  |
| H | 4.97722584458124  | -3.90471355246930 | 2.61393833326623  |
| H | 5.84723487452763  | -2.38039468340964 | 2.43541711962617  |
| C | 3.79302519955113  | -2.13979106044319 | 3.07135625326163  |
| H | 4.05651870349189  | -2.11718769796837 | 4.13821875487228  |
| H | 2.83823208047237  | -2.68970023233502 | 2.99626298434873  |
| C | 3.58648769904814  | -0.70411837190694 | 2.56156685298885  |
| H | 4.51523302775981  | -0.13200947684040 | 2.72084118614668  |
| H | 2.78872362696878  | -0.19869919951552 | 3.12400542096044  |
| C | 1.08807082058511  | 2.25512656679582  | -2.59006252895942 |
| H | 1.25208706905536  | 1.35049914578889  | -3.16503259200326 |
| C | -0.16963986393772 | 2.89710608295870  | -2.35098524629798 |
| H | -1.13947636655730 | 2.55088718011454  | -2.69413859353545 |
| C | 0.06287589533090  | 4.05859700870199  | -1.56559028121477 |
| H | -0.69078505710813 | 4.75121347889556  | -1.20379904819147 |
| C | 1.47682871619825  | 4.13035395645362  | -1.30865672263146 |
| H | 1.97743621588903  | 4.90636932995627  | -0.73627235991130 |
| C | 2.10490851267715  | 3.02419622238497  | -1.95512173063703 |
| H | 3.16749134369801  | 2.80621108693766  | -1.96465971964377 |
| C | 0.67419667872716  | -1.56290771131616 | -1.14401975731961 |
| H | 1.70294983530686  | -1.70879759943025 | -1.46038633495189 |
| C | -0.31592464051610 | -0.80524504582222 | -1.84130468394369 |
| H | -0.18178950262092 | -0.29582148797580 | -2.78868033716930 |
| C | -1.54022443651564 | -0.87581514449904 | -1.09937470419317 |
| H | -2.47562074249459 | -0.39091348590337 | -1.36059861290128 |
| C | -1.30138998691195 | -1.64416684457968 | 0.06357685449964  |
| H | -2.01941089890023 | -1.85207991217369 | 0.85143732681557  |
| C | 0.07615447018496  | -2.07388758117360 | 0.04199113775615  |
| H | 0.55716095994027  | -2.68892348550246 | 0.79653235127183  |
| N | -0.07088445706731 | 0.15553549709362  | 1.91638037080693  |
| C | -0.11786753654652 | 0.23417742461017  | 3.07943724979982  |
| C | -0.20440700108556 | 0.35573052985378  | 4.54403781872086  |
| F | 1.04543211561597  | 0.16938865138180  | 5.08973732406103  |
| F | -1.04195781415861 | -0.61135640501630 | 5.02966740754035  |
| H | -0.57627106756321 | 1.34611594244660  | 4.85101105251731  |

**[M4]<sup>+</sup>**

|    |                   |                  |                   |
|----|-------------------|------------------|-------------------|
| Fe | 0.69760053429386  | 2.34855477111040 | -0.46301492106808 |
| Fe | -0.00093000692692 | 0.01011813589058 | 0.08338927644090  |
| C  | 0.78943354507673  | 3.01292364125117 | 1.14491288335639  |
| C  | -1.03489726670140 | 1.60707029271044 | -0.02707042178022 |
| O  | 0.87898154239965  | 3.46814854911244 | 2.20976902211231  |
| O  | -2.14796780166112 | 1.98816983158506 | 0.08634537733803  |
| C  | 1.64719612509383  | 0.86016305811408 | 0.13221753937728  |
| N  | 2.85843052337050  | 0.59844767792647 | 0.54491293221300  |
| C  | 3.93005007275043  | 1.61077688354293 | 0.54248930540060  |
| H  | 4.60095714398268  | 1.45759927838450 | -0.31387755745586 |
| H  | 4.50921191364764  | 1.52485025708768 | 1.46845934370261  |
| H  | 3.47781041592965  | 2.60349330812906 | 0.48645167231003  |

|   |                   |                   |                   |
|---|-------------------|-------------------|-------------------|
| C | 3.22167679745255  | -0.75194508776370 | 1.07948780386637  |
| H | 2.30088173100074  | -1.33478687652002 | 0.97003755355009  |
| C | 4.32933336941580  | -1.41538417896610 | 0.25717942587567  |
| H | 5.26522650822891  | -0.84048948485024 | 0.35693791219239  |
| H | 4.06009352395308  | -1.41484875774004 | -0.81147890520674 |
| C | 4.56162436683640  | -2.84805335034437 | 0.76346701551230  |
| H | 3.65913948537783  | -3.45402840553078 | 0.56876846046810  |
| H | 5.37813071461246  | -3.31432046556403 | 0.19329694616626  |
| C | 4.87184084268998  | -2.86829409683297 | 2.26582508338031  |
| H | 4.98217124419765  | -3.90552085550529 | 2.61408866351419  |
| H | 5.84250175810959  | -2.37466777226213 | 2.44449317765696  |
| C | 3.78477966355524  | -2.14994456210702 | 3.07495489700326  |
| H | 4.04363726973497  | -2.13020499259356 | 4.14299251558908  |
| H | 2.83355430363059  | -2.70499237838285 | 2.99373337726215  |
| C | 3.57044656046010  | -0.71364953319544 | 2.57093952748792  |
| H | 4.49526560220148  | -0.13641906328173 | 2.73523387534451  |
| H | 2.76750961979089  | -0.21783138364122 | 3.13413463640185  |
| C | 1.09073629358378  | 2.26140226042264  | -2.57884275113863 |
| H | 1.26491186714345  | 1.36051569450509  | -3.15672120509840 |
| C | -0.17288949800667 | 2.89410193590948  | -2.34711318109710 |
| H | -1.13749180341286 | 2.54369776791274  | -2.70056268766641 |
| C | 0.04549407774198  | 4.05232673773375  | -1.55285123071360 |
| H | -0.71563537196265 | 4.73806631531095  | -1.19369645517086 |
| C | 1.45657105771145  | 4.13099618873243  | -1.28280993158128 |
| H | 1.94750065870494  | 4.90645684750040  | -0.70138682548275 |
| C | 2.09722203815407  | 3.03263761385166  | -1.93028138324163 |
| H | 3.16110077289466  | 2.82103205175976  | -1.93178613055753 |
| C | 0.68091239407458  | -1.56903939954679 | -1.15684325905123 |
| H | 1.71316737618184  | -1.70806198814330 | -1.46472308293039 |
| C | -0.30704935405350 | -0.81365661112981 | -1.85941552510034 |
| H | -0.16748056830354 | -0.29931607379093 | -2.80338154443803 |
| C | -1.53661851973626 | -0.89308001341023 | -1.12736281900154 |
| H | -2.47189019668659 | -0.41085124073744 | -1.39388556427132 |
| C | -1.30333687010626 | -1.66498606930290 | 0.03446920061331  |
| H | -2.02702660127715 | -1.87861183286710 | 0.81535007096821  |
| C | 0.07561165286238  | -2.08815251616394 | 0.02252820329392  |
| H | 0.55448062703192  | -2.70312950141467 | 0.77841066617684  |
| N | -0.09045871289654 | 0.14053418830612  | 1.91435203421840  |
| C | -0.13732405662976 | 0.25341636378559  | 3.07426736203680  |
| C | -0.14321274776823 | 0.38482879867518  | 4.52470103788590  |
| F | 1.04017886091733  | -0.13930091221149 | 5.06475863535389  |
| H | -0.99785590840695 | -0.16165821560909 | 4.95268979898969  |
| H | -0.21382757025944 | 1.45024717015856  | 4.795150148992    |
